# Supplementary material for: Modification of Gene Expression, DNA Methylation and Small RNAs Expression in Rice Plants under In Vitro Culture
Source: MDPI journal article supplement (doi:10.3390/agronomy12071675), 2022-07-14
Supplement: s1 [file s1]

Archive with 12 entries (12 files):
- Figure_S1.tif
- Figure_S2.tif
- Figure_S3.tif
- Figure_S4.tif
- Figure_S5.tif
- SupplementaryMaterialsLegends.pdf
- Table_S1.pdf
- Table_S2.pdf
- Table_S3.pdf
- Table_S4.xlsx
- Table_S5.xlsx
- Table_S6.xlsx
