# Supplementary material for: Modification of Gene Expression, DNA Methylation and Small RNAs Expression in Rice Plants under In Vitro Culture
Source: MDPI journal article supplement (doi:10.3390/agronomy12071675), 2022-07-14
Supplement: s1 [file s1 › Table_S1.pdf]

Supplementary Table S1. List of primers for MSAP amplification.

|          |                     |
|----------|---------------------|
| E ad 1   | CTCGTAGACTGCGTACC   |
| E ad 2   | AATTGGTACGCAGTCTAC  |
| H/M ad 1 | GACGATGAGTCTAGAA    |
| H/M ad 2 | CGTTCTAGACTCATC     |
| E+A      | GACTGCGTACCAATTCA   |
| H/M+T    | GATGAGTCTAGAACGGT   |
| E a      | GACTGCGTACCAATTCAAC |
| E b      | GACTGCGTACCAATTCAAG |
| E c      | GACTGCGTACCAATTCACA |
| E d      | GACTGCGTACCAATTCACT |
| E e      | GACTGCGTACCAATTCACC |
| E f      | GACTGCGTACCAATTCACG |
| E g      | GACTGCGTACCAATTCAGC |
| E h      | GACTGCGTACCAATTCAGG |
| E i      | GACTGCGTACCAATTCAGA |
| E j      | GACTGCGTACCAATTCATC |
| H/M 1    | GATGAGTCTAGAACGGTAC |
| H/M 2    | GATGAGTCTAGAACGGTAG |
| H/M 3    | GATGAGTCTAGAACGGTCT |
| H/M 4    | GATGAGTCTAGAACGGTCG |
| H/M 5    | GATGAGTCTAGAACGGTTC |
| H/M 6    | GATGAGTCTAGAACGGTTG |
| H/M 7    | GATGAGTCTAGAACGGTTA |
| H/M 8    | GATGAGTCTAGAACGGTGA |
| H/M 9    | GATGAGTCTAGAACGGTGC |
| H/M 10   | GATGAGTCTAGAACGGTGT |
