# Supplementary material for: Modification of Gene Expression, DNA Methylation and Small RNAs Expression in Rice Plants under In Vitro Culture
Source: MDPI journal article supplement (doi:10.3390/agronomy12071675), 2022-07-14
Supplement: s1 [file s1 › Table_S2.pdf]

Supplementary Table S2. List of genes and primers for identify data from microarray results.

| NO.    | Probeset             | Sequences (5'-3')                                                        |
|--------|----------------------|--------------------------------------------------------------------------|
| Gene1  | Os.18955.1.S1_at     | For: 5' GAGCCACTCATCCGAATCAA 3'<br>Rev: 5' TTATAAGGCACAAATCCCCTTA 3'     |
| Gene2  | Os.10356.1.S1_at     | For: 5' GAGTCGGAGAAGAAGGAGGC 3'<br>Rev: 5' CGTGGAAATCAAATGGTAAATC 3'     |
| Gene3  | Os.9642.1.S1_at      | For: 5' CTTACACACGCGGAAACACTC 3'<br>Rev: 5' CTGCCCTGGTTAAAGACATCAG 3'    |
| Gene4  | Os.17921.1.S1_at     | For: 5' AAGATGCTTGAGGATGCTGGTT 3'<br>Rev: 5' CCGTTCACAATGTCATCGTAGTC 3'  |
| Gene5  | OsAffx.15765.1.S1_at | For: 5' GATGGGAGGCCTGTGTTTAAT 3'<br>Rev: 5' AGCTATCGTCCGTCGATGATG 3'     |
| Gene6  | Os.20602.2.S1_x_at   | For: 5' GGTGGCAGTTCGTCGGCT 3'<br>Rev: 5' CACCGTCAACACATCCCGT 3'          |
| Gene7  | Os.12046.1.S1_at     | For: 5' TGCAATGCAAGTCCTCGAAAC 3'<br>Rev: 5' AGGGCTGTCATGGTAGAAATGG 3'    |
| Gene8  | Os.49726.1.S1_at     | For: 5' GCTATGAGAGTCCAAAGCCGAA 3'<br>Rev: 5' GGTGTTGAAATGGTCCCTGAAG 3'   |
| Gene9  | OsAffx.19820.1.S1_at | For: 5' ATGACTGGGGTGATGACGAAT 3'<br>Rev: 5' CAAACAAGGCTTGCAGCTCTA 3'     |
| Gene10 | Os.6723.1.S1_s_at    | For: 5' GCAAGAGATCGAGGAGAAGCAT 3'<br>Rev: 5' TGGGGCCTAGAACTAATTAAGTGT 3' |
| Gene11 | Os.55961.1.S1_at     | For: 5' CCTCGCAGATTCTTCTTGGC 3'<br>Rev: 5' TTGTCTTTGATGCTTTCCCG 3'       |
| Gene12 | Os.55913.1.S1_at     | For: 5' GCGACATGTTCGTGTTCCC 3'<br>Rev: 5' CCTGGTCTTGCTTGAGCTGG 3'        |
