# Supplementary material for: Modification of Gene Expression, DNA Methylation and Small RNAs Expression in Rice Plants under In Vitro Culture
Source: MDPI journal article supplement (doi:10.3390/agronomy12071675), 2022-07-14
Supplement: s1 [file s1 › Table_S3.pdf]

Supplementary Table S3. Differential expression of known miRNAs

| sRNA            | RL          | W_T         | log2.Fold<br>change. | p.value   | q.value.<br>Storey.et.al.,2003. |
|-----------------|-------------|-------------|----------------------|-----------|---------------------------------|
| osa-miR159a.1   | 741.4141164 | 5383.971417 | -2.8603              | 0         | 0                               |
| osa-miR166g-3p  | 13022.83876 | 4650.934839 | 1.4855               | 0         | 0                               |
| osa-miR166m     | 7892.052696 | 1675.859314 | 2.2355               | 0         | 0                               |
| osa-miR528-5p   | 8712.617779 | 1745.518039 | 2.3195               | 0         | 0                               |
| osa-miR1425-5p  | 88.1681652  | 1261.956893 | -3.8393              | 2.24E-260 | 5.48E-259                       |
| osa-miR169b     | 926.7676456 | 2015.2431   | -1.1207              | 1.55E-93  | 2.76E-92                        |
| osa-miR159a.2   | 15.02866452 | 218.6959956 | -3.8631              | 7.21E-47  | 8.82E-46                        |
| osa-miR397b     | 790.5077539 | 319.1341565 | 1.3086               | 3.93E-46  | 4.53E-45                        |
| osa-miR164e     | 216.4127691 | 21.05961439 | 3.3612               | 1.72E-41  | 1.87E-40                        |
| osa-miR156k     | 83.15861036 | 349.1036077 | -2.0697              | 1.97E-40  | 2.03E-39                        |
| osa-miR408-5p   | 335.6401743 | 79.37854654 | 2.0801               | 2.10E-38  | 2.06E-37                        |
| osa-miR397a     | 511.9765047 | 179.0067223 | 1.5161               | 9.99E-38  | 9.32E-37                        |
| osa-miR169f.2   | 409.781586  | 169.2869003 | 1.2754               | 8.30E-24  | 7.06E-23                        |
| osa-miR396a-5p  | 338.6459072 | 125.5477012 | 1.4315               | 1.52E-23  | 1.24E-22                        |
| osa-miR396c-5p  | 358.6841266 | 140.1274342 | 1.356                | 5.47E-23  | 4.28E-22                        |
| osa-miR5157a-3p | 0           | 81.80850204 | -7.3542              | 6.91E-20  | 4.83E-19                        |
| osa-miR394      | 1.001910968 | 75.32862069 | -6.2324              | 1.89E-19  | 1.28E-18                        |
| osa-miR5337a    | 150.2866452 | 35.63934743 | 2.0762               | 4.71E-18  | 3.07E-17                        |
| osa-miR160a-5p  | 7.013376777 | 63.98882833 | -3.1896              | 5.20E-13  | 3.18E-12                        |
| osa-miR156l-5p  | 179.3420633 | 69.65872451 | 1.3643               | 2.32E-12  | 1.37E-11                        |
| osa-miR169q     | 20.03821936 | 80.18853171 | -2.0006              | 4.32E-10  | 2.35E-09                        |
| osa-miR171d-5p  | 94.17963101 | 34.01937709 | 1.4691               | 7.56E-08  | 3.61E-07                        |
| osa-miR529b     | 119.2274052 | 50.21908046 | 1.2474               | 9.73E-08  | 4.54E-07                        |
| osa-miR5807     | 126.240782  | 56.69896181 | 1.1548               | 2.50E-07  | 1.11E-06                        |
| osa-miR160c-3p  | 92.17580907 | 34.82936226 | 1.4041               | 2.74E-07  | 1.19E-06                        |
| osa-miR5805     | 80.15287745 | 29.96945124 | 1.4193               | 1.35E-06  | 5.61E-06                        |
| osa-miR1428e-5p | 2.003821936 | 25.10954023 | -3.6474              | 1.79E-06  | 7.17E-06                        |
| osa-miR827      | 22.0420413  | 63.98882833 | -1.5376              | 3.30E-06  | 1.27E-05                        |
| osa-miR390      | 3.005732905 | 26.72951057 | -3.1526              | 3.45E-06  | 1.27E-05                        |
| osa-miR812r     | 12.02293162 | 46.16915462 | -1.9411              | 3.42E-06  | 1.27E-05                        |
| osa-miR1429-3p  | 31.05924001 | 5.669896181 | 2.4536               | 1.29E-05  | 4.68E-05                        |
| osa-miR444d.3   | 2.003821936 | 19.43964405 | -3.2782              | 5.64E-05  | 0.0002008                       |
| osa-miR1428b    | 66.1261239  | 28.34948091 | 1.2219               | 9.39E-05  | 0.0003283                       |
| osa-miR160e-5p  | 9.017198714 | 31.58942158 | -1.8087              | 0.0002485 | 0.0008538                       |
| osa-miR167d-3p  | 33.06306195 | 68.03875418 | -1.0411              | 0.0003838 | 0.0012736                       |
| osa-miR1427     | 13.02484259 | 37.25931776 | -1.5163              | 0.0004427 | 0.0014447                       |
| osa-miR812v     | 61.11656906 | 29.15946608 | 1.0676               | 0.0007644 | 0.0023025                       |
| osa-miR2118f    | 23.04395227 | 5.669896181 | 2.023                | 0.000855  | 0.0024986                       |
| osa-miR5149     | 23.04395227 | 5.669896181 | 2.023                | 0.000855  | 0.0024986                       |
| osa-miR6250     | 19.0363084  | 4.049925844 | 2.2328               | 0.0012507 | 0.0035491                       |
| osa-miR5072     | 4.007643873 | 18.62965888 | -2.2168              | 0.00133   | 0.0037202                       |

|             |             |             |         |           |           |
|-------------|-------------|-------------|---------|-----------|-----------|
| osa-miR1881 | 28.05350711 | 56.69896181 | -1.0151 | 0.0014944 | 0.0041212 |
| osa-miR812a | 46.08790454 | 21.05961439 | 1.1299  | 0.0022021 | 0.0059064 |
| novel_3     | 19.0363084  | 42.11922878 | -1.1457 | 0.0025572 | 0.0067661 |

---
