# Supplementary material for: Modification of Gene Expression, DNA Methylation and Small RNAs Expression in Rice Plants under In Vitro Culture
Source: MDPI journal article supplement (doi:10.3390/agronomy12071675), 2022-07-14
Supplement: s1 [file s1 › Table_S4.xlsx]

## Sheet: Sheet1
>novel_1
total read count 10
novel_1* read count 1
novel_1 read count 8
remaining read count 1
exp MMMMMMMMMMMMMMMMMMMMMMMMfffffffffffffffffffffffffffffffffffffffffffffffffffffffffffffffffffffffffffffffffffffffffffffffffffffffffffffffff************************
pri_seq aggcucuuguagggguauguguauaugcauuuauagggaacguuuauguuuauaccguguuuuuuuuuaaaaaaagcacuuucugaaaauuggcuugaagaagguaguauagauuuuguuauucaugcaugcguaauacacauauggacuuggaaggggca
pri_struct .(.(((((.((((.((((((((((((((((.(((.(((((((.....((((((((..(((((((((...)))))))))((((((..((......))..))))))..))))))))..)))).)))))).)))))).))))))))))...)))).))))).).																							#MM	+/-
W_T_3370767_x5 aggcucuuguagggguauguguau.........................................................................................................................................																							0	+
RL_2573101_x3 aggcucuuguagggguauguguau.........................................................................................................................................																							0	+
W_T_440536_x1 ..................................................................................................................................gcguaauacacauaugga.............																							0	+
W_T_906204_x1 .........................................................................................................................................acacauauggacuuggaaggggca																							0	0
>novel_2
total read count 22
novel_2* read count 1
novel_2 read count 19
remaining read count 2
exp MMMMMMMMMMMMMMMMMMMMMMMMfffffffffffffffffffffff************************
pri_seq agugucgaugcuaggguaguuggugccgacacauuaaugguuagcaccgauagcuuuggugucgaucugau
pri_struct ...((((((((((((((.((((((((.(((.((....))))).)))))))).)))))))))))))).....															#MM	+/-
RL_227370_x7 agugucgaugcuaggguaguuggu...............................................															0	+
W_T_2023811_x7 agugucgaugcuaggguaguuggu...............................................															0	+
RL_643901_x1 .gugucgaugcuaggguaguuggug..............................................															0	+
W_T_2127456_x2 .gugucgaugcuaggguaguuggug..............................................															0	+
W_T_1623955_x1 ...gucgaugcuaggguaguuggug..............................................															0	+
W_T_1851646_x1 ...gucgaugcuaggguaguuggugcc............................................															0	+
W_T_399397_x2 .................aguuggugccgacacauuaauggu..............................															0	-
W_T_2582046_x1 ...............................................cgauagcuuuggugucgaucugau															0	+
>novel_3
total read count 77
novel_3 read count 71
novel_3* read count 0
remaining read count 6
exp *******************fffffffffffffffffffffffffffffffffffffffffffffffffffffffffffffffffffffffffffffffffffffffffffffffffffffffffffffffffffffffffffffffffffffffffffffffffffffffffffffffffffffffffffffffffffffffffffffffffffffffffffffffffffffffffffffffffffffffffffffffffffffffffMMMMMMMMMMMMMMMMMMMMM
pri_seq cagcgacugguggcgggggaggcgggcgacuggggggagggggagaggcgggagagggggggagggcgcagcgccgccggaggggagggggaggggaagcgacgccgguggcgggggaggcggccagcuggggggaggggggagaggcggcgucagcggcgcgauggcggaucugccgcgagagggaggcuagagggccgccgcuuccccucccccuccccuccggcggcgccgcccccucucccccuccccccagcuggcggcuucccccgccaccggcgccgcuucc
pri_struct ..(((.(((((((((((((((((.(.((.(((((((((((((((((((...............(((((..((((((((((((((((((((((((((((((..(.(((....))).)..(((((((..((((......(.((.(((..((.((((.((...)))))).))..))).)).)..........))))..))))))))))))))))))))))))))))))))))))))))))))))))))))))))))))).)).).)))))))))))))))))))).......																																						#MM	+/-
W_T_2825900_x2 .........................................................................................................................................................................................................................................................................ucccccgccaccggcgccgcu...																																						0	-
RL_1769633_x4 .........................................................................................................................................................................................................................................................................ucccccgccaccggcgccgcu...																																						0	-
W_T_353806_x2 ..........................................................................................................................................................................................................................................................................cccccgccaccggcgccgcu...																																						0	-
RL_464992_x10 ..........................................................................................................................................................................................................................................................................cccccgccaccggcgccgcuu..																																						0	-
W_T_1799601_x30 ..........................................................................................................................................................................................................................................................................cccccgccaccggcgccgcuu..																																						0	-
RL_1550761_x1 ...........................................................................................................................................................................................................................................................................ccccgccaccggcgccgcuu..																																						0	-
W_T_164823_x1 ...........................................................................................................................................................................................................................................................................ccccgccaccggcgccgcuu..																																						0	-
RL_1623035_x7 ...........................................................................................................................................................................................................................................................................ccccgccaccggcgccgcuuc.																																						0	-
W_T_1601437_x12 ...........................................................................................................................................................................................................................................................................ccccgccaccggcgccgcuuc.																																						0	-
W_T_1612904_x1 ............................................................................................................................................................................................................................................................................cccgccaccggcgccgcuuc.																																						0	+
RL_2380063_x1 ............................................................................................................................................................................................................................................................................cccgccaccggcgccgcuucc																																						0	+
W_T_2463263_x6 ............................................................................................................................................................................................................................................................................cccgccaccggcgccgcuucc																																						0	+
>novel_4
total read count 50
novel_4* read count 0
novel_4 read count 50
remaining read count 0
exp MMMMMMMMMMMMMMMMMMMMMfffffffffffffffffffffffffffffffffffffffffffffffffffffffffffffffffffffffffffffffffffffffffffffffffffffffffffffffffffffffffffffffffffffffffffffffffffffff*********************
pri_seq aagcggcgccgguggcgggggaagccgccagcuggggggagggggagagggggcggcgccgccggaggggagggggaggggaagcggcggcccucuagccucccucucgcggcagauccgccaucgcgccgcugacgccgccucuccccccuccccccagcuggccgccucccccgccaccggcgucgcuucc
pri_struct ((((((((((((((((((((((.((.(((((((((((((((((((.((((((.(((((((((..(((((((((.((((((..........))))))..)))))).)))))))(((...(((....)))...))).)))))))))))))))))))))))))))))).)).))))))))))))))))))))))..																										#MM	+/-
W_T_164823_x1 aagcggcgccgguggcgggg.............................................................................................................................................................................																										0	+
RL_1550761_x1 aagcggcgccgguggcgggg.............................................................................................................................................................................																										0	+
RL_464992_x10 aagcggcgccgguggcggggg............................................................................................................................................................................																										0	+
W_T_1799601_x30 aagcggcgccgguggcggggg............................................................................................................................................................................																										0	+
W_T_353806_x2 .agcggcgccgguggcggggg............................................................................................................................................................................																										0	+
RL_1769633_x4 .agcggcgccgguggcggggga...........................................................................................................................................................................																										0	+
W_T_2825900_x2 .agcggcgccgguggcggggga...........................................................................................................................................................................																										0	+
>novel_5
total read count 11
novel_5 read count 11
novel_5* read count 0
remaining read count 0
exp ************************ffffffffffffffffffffffffffffffffffffffffffffffffffffffffffffffffffffffffffffffffffffffffffffffffffffffffffffffffffffffffffffffffffffffffffffffffMMMMMMMMMMMMMMMMMMMMMMMM
pri_seq guaacucucauccuacaccguuggaucgagaaauggacgucgagauucguccacgucaccaugaguuaaaauuuaacucgcagauucacucaugaguuaaaauuuacuggaaguuaaauuuuaacucauagugacguggacgaaucucgaacguccauuucucgauccaacaguguaggaugaaaguugcau
pri_struct ((((((.(((((((((((.((((((((((((((((((((((((((((((((((((((((.((((((((((((((((((..((((((((....))))).........)))..)))))))))))))))))).))))))))))))))))))).))))))))))))))))))))).))))))))))).))))))..																										#MM	+/-
RL_2356916_x2 .......................................................................................................................................................................caacaguguaggaugaaaguugca.																										0	+
W_T_672673_x1 ........................................................................................................................................................................aacaguguaggaugaaaguugca.																										0	+
RL_966625_x3 ........................................................................................................................................................................aacaguguaggaugaaaguugcau																										0	+
W_T_616652_x5 ........................................................................................................................................................................aacaguguaggaugaaaguugcau																										0	+
>novel_6
total read count 49
novel_6 read count 49
novel_6* read count 0
remaining read count 0
exp ********************ffffffffffffffffffffffffffffffffffffffffffffffMMMMMMMMMMMMMMMMMMMMMM
pri_seq ugacagaagagagugagcacacggccgggcgugacggcaccggcgggcgugccgucgcggccgcgugcucacugcucuuucugucauc
pri_struct ((((((((((((((((((((.(((((....(((((((((((.....).))))))))))))))).))))))))).))).))))))))..															#MM	+/-
RL_2349124_x2 .................................................................ugcucacugcucuuucugucauc															0	+
W_T_2534439_x1 .................................................................ugcucacugcucuuucugucauc															0	+
W_T_402130_x23 ..................................................................gcucacugcucuuucugucauc															0	+
RL_629719_x22 ..................................................................gcucacugcucuuucugucauc															0	+
RL_178727_x1 ....................................................................ucacugcucuuucugucauc															0	+
>novel_7
total read count 8
novel_7* read count 0
novel_7 read count 8
remaining read count 0
exp **************************ffffffffffffffffffffffffffffffffffffMMMMMMMMMMMMMMMMMMMMMMMM
pri_seq uuuuuauauauaguauuucuauacauaaauuuuucuaacuuuuuguuuuuuaaaaaaauuuugugugguguacuguaguaggggag
pri_struct (((((((.((((((((..(((((((.((((((((..(((.....)))......))))))))))))))).)))))))))))))))..																#MM	+/-
W_T_438100_x1 ..............................................................gugugguguacuguaguagggga.																0	+
W_T_2567600_x6 ..............................................................gugugguguacuguaguaggggag																0	+
RL_920880_x1 ..............................................................gugugguguacuguaguaggggag																0	+
>novel_8
total read count 30
novel_8 read count 11
novel_8* read count 1
remaining read count 18
exp ************************ffffffffffffffffffffffffffffffffffffffffffffffffffffffffffMMMMMMMMMMMMMMMMMMMMMMMM
pri_seq cuaccauaguggcacuccaauuauagacacuuauguguaggacaauaggagaaugagacccacauaccaagugacuuauaaugauagugauauuaugguagaggau
pri_struct (((((((((((.((((...(((((((.(((((.(((((.((.................)).)))))..)))))..)))))))...)))).))))))))))).....																	#MM	+/-
W_T_3140043_x1 cuaccauaguggcacuccaauuau..................................................................................																	0	+
W_T_3355781_x1 ..........................acacuuauguguaggacaaua...........................................................																	0	+
RL_1935251_x1 ..........................acacuuauguguaggacaauagga........................................................																	0	+
W_T_2306204_x1 ............................acuuauguguaggacaauaggaga......................................................																	0	+
W_T_2669510_x1 .............................cuuauguguaggacaauaggagaa.....................................................																	0	+
RL_1492277_x2 .............................cuuauguguaggacaauaggagaa.....................................................																	0	+
W_T_500124_x1 .............................cuuauguguaggacaauaggagaau....................................................																	0	+
W_T_981129_x1 ..............................uuauguguaggacaauaggaga......................................................																	0	+
RL_516470_x1 ..............................uuauguguaggacaauaggaga......................................................																	0	+
RL_1443824_x1 ..............................uuauguguaggacaauaggagaa.....................................................																	0	+
W_T_1299158_x1 ................................auguguaggacaauaggagaau....................................................																	0	-
RL_120610_x1 ................................auguguaggacaauaggagaauga..................................................																	0	+
W_T_700498_x2 ...................................uguaggacaauaggagaaugagac...............................................																	0	+
RL_1099132_x2 ...................................uguaggacaauaggagaaugagac...............................................																	0	+
W_T_346195_x1 ...................................uguaggacaauaggagaaugagacc..............................................																	0	+
RL_386651_x1 ...................................................................caagugacuuauaaugauagugau...............																	0	+
W_T_1497350_x3 .................................................................................ugauagugauauuaugguagagga.																	0	+
RL_2335670_x1 .................................................................................ugauagugauauuaugguagagga.																	0	+
W_T_580013_x1 .................................................................................ugauagugauauuaugguagaggau																	0	+
W_T_1831625_x5 ..................................................................................gauagugauauuaugguagaggau																	0	+
RL_180439_x1 ..................................................................................gauagugauauuaugguagaggau																	0	+
>novel_9
total read count 6
novel_9* read count 0
novel_9 read count 5
remaining read count 1
exp MMMMMMMMMMMMMMMMMMMMMMMMffffff************************
pri_seq aucaaaaguagauggaaugaguauauuaauacuccauccaucuacuuuugauag
pri_struct ((((((((((((((((..((((((....))))))..))))))))))))))))..											#MM	+/-
RL_2037111_x2 aucaaaaguagauggaaugaguau..............................											0	+
W_T_3021682_x3 aucaaaaguagauggaaugaguau..............................											0	+
W_T_3283666_x1 ......................auauuaauacuccauccaucuacu........											0	-
>novel_10
total read count 9
novel_10 read count 9
novel_10* read count 0
remaining read count 0
exp ************************fffffffffffffffffffffffffffffffffffffffffffffffffffffffffffffffffffffMMMMMMMMMMMMMMMMMMMMMMMM
pri_seq uuaauacucccuccgucucuaaauauuuggcgucguuaacuuuuuuaaacauguuuaaccguucaucuuauuaaaaucaacggcgucaaauauuuagaaacggauggaguagaagaa
pri_struct ....((((((.(((((.((((((((((((((((((((...(((..(((..(((..........))).)))..)))...)))))))))))))))))))).))))).))))))......																		#MM	+/-
RL_2590160_x1 ...........................................................................................auuuagaaacggauggaguagaaga.																		0	+
RL_1278174_x1 .............................................................................................uuagaaacggauggaguagaaga.																		0	+
W_T_1764608_x5 .............................................................................................uuagaaacggauggaguagaagaa																		0	+
RL_457325_x1 .............................................................................................uuagaaacggauggaguagaagaa																		0	+
RL_896783_x1 ...............................................................................................agaaacggauggaguagaagaa																		0	+
>novel_11
total read count 11
novel_11 read count 11
novel_11* read count 0
remaining read count 0
exp MMMMMMMMMMMMMMMMMMMMMMMMffff************************
pri_seq guucuagcuaugaaucugaagacgcacguauucagguucauagcuagagauu													#MM	+/-
pri_struct .(((((((((((((((((((.((....)).)))))))))))))))))))...													0	+
RL_2074474_x4 guucuagcuaugaaucugaagacg............................													0	+
W_T_1327745_x7 guucuagcuaugaaucugaagacg............................
>novel_12
total read count 39
novel_12 read count 22
novel_12* read count 2
remaining read count 15
exp ************************fffffffffffffffffffffffffffffffffffffffffffffffffffMMMMMMMMMMMMMMMMMMMMMMMM
pri_seq gauauccuuugcagccaaauuuaugaugucuuuaucacugacauguggauucaggaaucagugauaaagucacgugacuuugacugcagaggauccgga
pri_struct ...(((((((((((.((((.(((((.((.((((((((((((..(.((....)).)..)))))))))))).))))))).)))).))))))))))).....																	#MM	+/-
RL_217781_x2 ...auccuuugcagccaaauuuaugau........................................................................																	0	-
W_T_277728_x1 ................................uaucacugacauguggauucagga...........................................																	0	+
RL_1430445_x1 .................................aucacugacauguggauucaggaa..........................................																	0	+
W_T_2629856_x1 .................................aucacugacauguggauucaggaa..........................................																	0	+
W_T_639439_x1 ..................................ucacugacauguggauucaggaa..........................................																	0	+
RL_260688_x1 ..................................ucacugacauguggauucaggaau.........................................																	0	+
W_T_3334940_x1 .....................................cugacauguggauucaggaaucag......................................																	0	+
W_T_2842759_x1 .........................................cauguggauucaggaaucag......................................																	0	+
W_T_420807_x1 .........................................cauguggauucaggaaucagugau..................................																	0	+
RL_1276329_x1 ..........................................auguggauucaggaaucagugaua.................................																	0	+
RL_359891_x1 ...........................................uguggauucaggaaucagugauaa................................																	0	+
W_T_2767651_x1 ........................................................aucagugauaaagucacgugacuu...................																	0	-
RL_690959_x1 ............................................................gugauaaagucacgugacuuugac...............																	0	+
W_T_2357226_x1 ............................................................gugauaaagucacgugacuuugac...............																	0	+
W_T_772419_x1 ................................................................uaaagucacgugacuuugacugca...........																	0	+
RL_1052097_x1 ........................................................................cgugacuuugacugcagaggauccg..																	0	-
W_T_211802_x2 .........................................................................gugacuuugacugcagaggauccg..																	0	+
RL_330960_x2 .........................................................................gugacuuugacugcagaggauccg..																	0	+
RL_1091540_x1 ..........................................................................ugacuuugacugcagaggauccg..																	0	+
W_T_695687_x2 ..........................................................................ugacuuugacugcagaggauccg..																	0	+
W_T_2650925_x1 ..........................................................................ugacuuugacugcagaggauccgg.																	0	+
RL_769396_x1 ..........................................................................ugacuuugacugcagaggauccgg.																	0	+
W_T_994021_x7 ...........................................................................gacuuugacugcagaggauccgga																	0	+
RL_2038539_x5 ...........................................................................gacuuugacugcagaggauccgga																	0	+
RL_530297_x1 ............................................................................acuuugacugcagaggauccg..																	0	+
>novel_13
total read count 38
novel_13 read count 12
novel_13* read count 1
remaining read count 25
exp MMMMMMMMMMMMMMMMMMMMMMMMfffffffffffffffffffffffffffffffffffffffffffffffffffffffffffffffffffffffffffffffffffffff************************
pri_seq gugauacgaugaaugaugaaggaguaaaaccauuuguugaacuauaagguacucaauuaaagaauuuuuuauuauuugugaguacccuauaguucaacaaauccuuuuacucacucaucauucaucauaucacau
pri_struct ((((((.((((((((((((..((((((((..(((((((((((((((.((((((((..((((.(((.....))).)))))))))))).)))))))))))))))..))))))))..)))))))))))).))))))..																				#MM	+/-
W_T_479567_x7 gugauacgaugaaugaugaaggag...............................................................................................................																				0	+
W_T_676188_x2 ..gauacgaugaaugaugaaggagua.............................................................................................................																				0	+
W_T_1815806_x1 ...auacgaugaaugaugaaggaguaaa...........................................................................................................																				0	+
W_T_903264_x1 ....uacgaugaaugaugaaggagu..............................................................................................................																				0	+
RL_1851320_x1 ....uacgaugaaugaugaaggaguaaa...........................................................................................................																				0	+
W_T_1752659_x1 ........................uaaaaccauuuguugaacuauaag.......................................................................................																				0	+
W_T_2630156_x2 ...........................aaccauuuguugaacuauaaggua....................................................................................																				0	+
RL_896482_x1 ..............................cauuuguugaacuauaaggua....................................................................................																				0	+
W_T_3268609_x2 ...........................................................................uugugaguacccuauaguuca.......................................																				0	-
W_T_2747513_x3 ...........................................................................uugugaguacccuauaguucaaca....................................																				0	-
RL_711681_x1 ...........................................................................uugugaguacccuauaguucaaca....................................																				0	-
W_T_1694420_x1 ............................................................................ugugaguacccuauaguucaaca....................................																				0	-
RL_1562465_x1 ................................................................................aguacccuauaguucaacaaa..................................																				0	-
RL_896170_x1 .................................................................................guacccuauaguucaacaaauc................................																				0	-
W_T_2289669_x3 .................................................................................guacccuauaguucaacaaauccu..............................																				0	-
RL_897388_x3 .................................................................................guacccuauaguucaacaaauccu..............................																				0	-
W_T_37730_x1 ...............................................................................................aacaaauccuuuuacucacucauc................																				0	-
RL_1087237_x1 ...................................................................................................aauccuuuuacucacucaucauuc............																				0	-
RL_1958417_x1 .....................................................................................................uccuuuuacucacucaucauuc............																				0	-
RL_2012204_x2 ..........................................................................................................uuacucacucaucauucaucauau.....																				0	-
W_T_893280_x1 ..........................................................................................................uuacucacucaucauucaucauau.....																				0	-
W_T_1762428_x1 ..............................................................................................................ucacucaucauucaucauaucaca.																				0	-
>novel_14
total read count 48
novel_14* read count 1
novel_14 read count 15
remaining read count 32
exp ********************ffffffffffffffffffffffffffffffffffffffffffffffffffffffffMMMMMMMMMMMMMMMMMMMMMMMM
pri_seq ucuaacuuugugcaguuuggaguugugccacuaauaugugggccauaucaaaguagggucuacaugucagugguauaacuguagacuacacaaagucagg
pri_struct .((.((((((((.((((((.((((((((((((.(((((((((((.(((....))).))))))))))).)))))))))))).)))))).)))))))).)).																	#MM	+/-
W_T_435083_x1 ucuaacuuugugcaguuugg................................................................................																	0	+
W_T_593638_x2 ................................aauaugugggccauaucaaaguag............................................																	0	+
W_T_2578575_x1 .................................auaugugggccauaucaaagua.............................................																	0	+
RL_462895_x1 ..................................uaugugggccauaucaaaguagg...........................................																	0	+
RL_1956418_x1 ...................................augugggccauaucaaagua.............................................																	0	+
RL_1148271_x3 .....................................gugggccauaucaaagua.............................................																	0	+
RL_1997503_x1 .....................................gugggccauaucaaaguag............................................																	0	+
W_T_334610_x4 .....................................gugggccauaucaaaguagggucu.......................................																	0	+
RL_1860656_x1 .......................................gggccauaucaaaguagggucuac.....................................																	0	-
W_T_2812687_x2 .......................................gggccauaucaaaguagggucuac.....................................																	0	-
W_T_1653677_x1 .........................................gccauaucaaaguagggucuacau...................................																	0	+
RL_1728606_x1 .........................................gccauaucaaaguagggucuacau...................................																	0	-
RL_681694_x1 ............................................auaucaaaguagggucuacauguc................................																	0	+
W_T_2515050_x1 .............................................uaucaaaguagggucuacauguca...............................																	0	+
RL_262708_x1 ..............................................aucaaaguagggucuacaugucag..............................																	0	-
RL_1486312_x2 ...............................................ucaaaguagggucuacaugucagu.............................																	0	+
W_T_3005757_x2 .................................................aaaguagggucuacaugucagugg...........................																	0	+
W_T_2565534_x1 ..................................................aaguagggucuacaugucaguggu..........................																	0	+
W_T_2818076_x1 ...................................................aguagggucuacaugucaguggua.........................																	0	+
RL_1596419_x1 ........................................................ggucuacaugucagugguauaacu....................																	0	-
W_T_2679697_x1 ...........................................................cuacaugucagugguauaacugua.................																	0	-
W_T_2647785_x1 ......................................................................ugguauaacuguagacuacacaaa......																	0	-
RL_1167139_x1 ........................................................................guauaacuguagacuacacaa.......																	0	+
W_T_2972825_x1 .........................................................................uauaacuguagacuacacaaag.....																	0	+
W_T_709618_x1 ..........................................................................auaacuguagacuacacaaag.....																	0	+
W_T_2431666_x1 ..........................................................................auaacuguagacuacacaaagu....																	0	+
W_T_652529_x2 ..........................................................................auaacuguagacuacacaaaguca..																	0	+
RL_1022901_x2 ..........................................................................auaacuguagacuacacaaaguca..																	0	+
W_T_694544_x1 ...........................................................................uaacuguagacuacacaaagu....																	0	+
W_T_1176395_x1 ...........................................................................uaacuguagacuacacaaagucag.																	0	+
W_T_1035100_x4 ............................................................................aacuguagacuacacaaagucagg																	0	+
RL_1622057_x3 ............................................................................aacuguagacuacacaaagucagg																	0	+
>novel_15
total read count 8
novel_15 read count 8
novel_15* read count 0
remaining read count 0
exp ************************ffffffffffffffffffffffffffffffffffffffffffffffffffffffffffffffffffffffffffffffffffffffffffffffffffffffffffffffffffffffffffffffffffffffffffffffffffffffffffffffffffffffffffffffffffffffffffffffffffffffffffffMMMMMMMMMMMMMMMMMMMMMMMM
pri_seq ucuauucccuuuguuccauguuauaagucguuugauuuuuuuccuagucaaacuucuuuaagcuugaccaagcucauagaaaaauauaguaauauuuuuaacacaaaacaaacauauuaucaaaauauuuaaugaaacuaauuugauauuuuagauguugcuaaauuuuucuauaaacuuaaucgaacuuaacaaaguuuggcuaggaaaaaaagucaaacgaauuauaauaugaaauggacggaauaguac
pri_struct .(((((((.((((((.((((((((((.((((((((((((((((((((((((((((..(((((.((((..(((...((((((((((.(((((((((((........................((((((((.(((.......))).))))))))))))))))))).))))))))))...)))..)))).)))))..))))))))))))).))))))))))))))).)))))))))).)))))).)))))))...																																		#MM	+/-
RL_1770768_x1 ..................................................................................................................................................................................................................................auaauaugaaauggacggaauagu..																																		0	+
RL_1757380_x1 ....................................................................................................................................................................................................................................aauaugaaauggacggaauaguac																																		0	+
W_T_3044318_x6 ....................................................................................................................................................................................................................................aauaugaaauggacggaauaguac																																		0	+
>novel_16
total read count 17
novel_16 read count 15
novel_16* read count 1
remaining read count 1
exp ***********************fffffffffffffffffffffffffffffffffffffffffffffffffffffffffffffffffffMMMMMMMMMMMMMMMMMMMMMMMM
pri_seq cgacaguuuuugguugucaucaucagguugaggcgaggcaugaauugaccuuuuucucucgcccucucccuuuccucaaccauucuucaugaggauaaccgaaaacucgucgau
pri_struct ((((((((((((((((((.((((..((((((((.((((.......(((..........))).......)))).)))))))).......)))).)))))))))))))).))))..																			#MM	+/-
RL_1724016_x1 ....aguuuuugguugucaucaucaggu......................................................................................																			0	-
W_T_128258_x1 ..........................guugaggcgaggcaugaauugacc................................................................																			0	+
W_T_1419101_x1 ..........................................................................................gaggauaaccgaaaacucgucga.																			0	+
RL_1365949_x6 ..........................................................................................gaggauaaccgaaaacucgucgau																			0	+
W_T_870607_x8 ..........................................................................................gaggauaaccgaaaacucgucgau																			0	+
>novel_17
total read count 39
novel_17* read count 0
novel_17 read count 22
remaining read count 17
exp ************************fffffffffffffffffffffffffffffffffffffffffffffffffffffffffffffffffffffffffffffffffffffffMMMMMMMMMMMMMMMMMMMMMMMM
pri_seq cacacauaguaguccagucaacauaaaaauaaaaaauggugaggcccacuuaucgguuaugucuuuucucucgaucaccacauguggguccuaccuuuuuuauauuuucauauugacuggacugcuacgugucac
pri_struct .((((.(((((((((((((((.((.(((((((((((.((((.(((((((.....(((...(((.........))).)))....))))))).)))).))))).)))))).)).))))))))))))))).))))...																					#MM	+/-
RL_108008_x1 ....................................................ucgguuaugucuuuucucucgauc...........................................................																					0	-
RL_1039117_x1 .......................................................guuaugucuuuucucucgaucacc........................................................																					0	-
RL_433023_x2 .........................................................uaugucuuuucucucgaucaccac......................................................																					0	-
W_T_1992927_x3 .........................................................uaugucuuuucucucgaucaccac......................................................																					0	-
RL_2414067_x2 ..........................................................augucuuuucucucgaucaccaca.....................................................																					0	-
W_T_1184640_x1 ..........................................................augucuuuucucucgaucaccaca.....................................................																					0	-
RL_1465972_x1 ..................................................................ucucucgaucaccacauguggguc.............................................																					0	-
W_T_2298023_x2 ..................................................................ucucucgaucaccacauguggguc.............................................																					0	-
W_T_2994541_x2 ....................................................................................................uauauuuucauauugacuggacug...........																					0	+
W_T_1350765_x1 .....................................................................................................auauuuucauauugacugg...............																					0	+
W_T_1593661_x1 .....................................................................................................auauuuucauauugacuggacug...........																					0	+
RL_1952827_x1 ...............................................................................................................auugacuggacugcuacguguca.																					0	+
RL_476570_x12 ...............................................................................................................auugacuggacugcuacgugucac																					0	+
W_T_304353_x9 ...............................................................................................................auugacuggacugcuacgugucac																					0	+
>novel_18
total read count 36
novel_18* read count 0
novel_18 read count 35
remaining read count 1
exp **************************ffffffffffffffffffffffffffffMMMMMMMMMMMMMMMMMMMMMMMM
pri_seq gacuucuaucggugacggaucauccccgauauucaugucuuaaacgacguaccuuuugaacuguuagagaugagucau
pri_struct (((((..(((..((((((.(((............(((((......)))))......))).))))))..))))))))..														#MM	+/-
W_T_3417538_x1 .................gaucauccccgauauucaugucuu.....................................														0	-
RL_2285746_x1 .....................................................uuuugaacuguuagagaugaguc..														0	+
RL_2065652_x2 .....................................................uuuugaacuguuagagaugaguca.														0	+
W_T_1322083_x1 .....................................................uuuugaacuguuagagaugaguca.														0	+
W_T_14454_x1 ......................................................uuugaacuguuagagauga.....														0	+
RL_1309815_x1 ......................................................uuugaacuguuagagaugagu...														0	+
W_T_530815_x3 ......................................................uuugaacuguuagagaugaguc..														0	+
W_T_1322274_x1 ......................................................uuugaacuguuagagaugaguca.														0	+
RL_1237193_x8 ......................................................uuugaacuguuagagaugagucau														0	+
W_T_2506404_x16 ......................................................uuugaacuguuagagaugagucau														0	+
RL_930799_x1 ........................................................ugaacuguuagagaugagucau														0	+
>novel_19
total read count 6
novel_19* read count 0
novel_19 read count 6
remaining read count 0
exp ************************ffMMMMMMMMMMMMMMMMMMMMMMMM
pri_seq uccuacuuaccaaccuagacauauuuauguucagauucguagcuaggguu
pri_struct (((((.((((.((.((.(((((....))))).)).)).)))).)))))..											#MM	+/-
RL_1458821_x3 ..........................auguucagauucguagcuaggguu											0	+
W_T_1005612_x3 ..........................auguucagauucguagcuaggguu											0	+
>novel_20
total read count 25
novel_20 read count 25
novel_20* read count 0
remaining read count 0
exp MMMMMMMMMMMMMMMMMMMMMMMMffffffffff***********************
pri_seq guuuguagauacucagaagcuggcuaccaaauaguagcuucucagaaucuuaagcuc
pri_struct (((((.((((.((.((((((((.(((.....))))))))))).)).)))))))))..												#MM	+/-
W_T_1679601_x14 guuuguagauacucagaagcuggc.................................												0	+
RL_2214715_x11 guuuguagauacucagaagcuggc.................................												0	+
>novel_21
total read count 13
novel_21 read count 13
novel_21* read count 0
remaining read count 0
exp MMMMMMMMMMMMMMMMMMMMMMMMffffffffffffffffffffffffffffffffffffffffffffffffffff*************************
pri_seq gggauaugugguauugcgguugaaauaaguucauuugagaucccuuaacuugacagcaaauucaauuuuuaucuuugaaccgcaauaccagauacaauggg
pri_struct ....(((.(((((((((((((.((((((((.....((((....))))))))).....................))).))))))))))))).))).......																	#MM	+/-
W_T_208659_x2 gggauaugugguauugcgguuga..............................................................................																	0	+
W_T_740038_x8 gggauaugugguauugcgguugaa.............................................................................																	0	+
RL_1972385_x3 gggauaugugguauugcgguugaa.............................................................................																	0	+
>novel_22
total read count 24
novel_22* read count 0
novel_22 read count 23
remaining read count 1
exp MMMMMMMMMMMMMMMMMMMMMMMMffff*************************
pri_seq agauacgcgucugauaagucuggauaaccacuuauccagguucgcuauacuag
pri_struct (((((.(((((((((((((..((....)))))))).))))..)))))).))..													#MM	+/-
RL_740171_x1 agauacgcgucugauaaguc.................................													0	+
W_T_2508140_x12 agauacgcgucugauaagucugga.............................													0	+
RL_1239918_x9 agauacgcgucugauaagucugga.............................													0	+
RL_424661_x1 ....acgcgucugauaagucuggauaac.........................													0	-
RL_1789389_x1 .........................aaccacuuauccagguucgcuauac...													0	-
>novel_23
total read count 13
novel_23 read count 13
novel_23* read count 0
remaining read count 0
exp MMMMMMMMMMMMMMMMMMMMMMMMffffffffffffffffffffffffffffffffffffffffffffffffffffffffffffffffffffffffffffffffffffffffffffffffffffffffffffffffffffffffffffffffffffffffffffffffffffffffffffffffffffffffffffffffffffffffffffffffffffffffffffffffffffffffffffffffffffffffffffffffff**************************
pri_seq aacggucuguuugguuggagggaguuucuaggagggauugggaguuuaaagggaugagguuauuaacuguuuuguuugguugggggacaugggaauuuugguaggauggggauggggaauugaggaaugaacucccuccuuuucaauaccuggguaggggcagguaauugggagggaauuccuccuuuacuucgccuaaacaaaucucagccauucguuuucaguaaugaucuaaucuccaacuaaacuccauaucaauuuccaccaccucuaccaaacaagagacugggau
pri_struct ..(((((((((((((.(((((..((.....((((((((..((((((((..(((((.(((((((((.(((...((..(((((((((...........((((.((((.(((((.(((((....(((((((....((((((((......((((((........))))))...)))))))))))))))))))))))))))))..)))))))))))))..))....)))))))))))).)))))....))))))))..)))..)))))))..))))))))))))...))))))....																																						#MM	+/-
RL_1403298_x4 aacggucuguuugguuggagggag............................................................................................................................................................................................................................................................................																																						0	+
W_T_894766_x3 aacggucuguuugguuggagggag............................................................................................................................................................................................................................................................................																																						0	+
RL_1324791_x4 .acggucuguuugguuggagggagu...........................................................................................................................................................................................................................................................................																																						0	+
W_T_844140_x2 .acggucuguuugguuggagggagu...........................................................................................................................................................................................................................................................................																																						0	+
>novel_24
total read count 15
novel_24 read count 15
novel_24* read count 0
remaining read count 0
exp ***********************ffffffffffffffffffffffffffffffffffffffffffffffffffffffffffffffffffffffffffffffffffffffffffffffffffffffffffffffffffffffMMMMMMMMMMMMMMMMMMMMMMM
pri_seq gaacuacucccuccauuucacaauguaagucauucuagcauuucccacauucauguugauguuaaugaauauagauagauauauguguuuagauucauuaacauuaauaugaauguggaaaaugcuagaaugacuuacauuguggaacggaggaaguagguauu
pri_struct ...(((((.(((((.((((((((((((((((((((((((((((.((((((((((((((((((((((((((.((((((........)))))).)))))))))))))))))))))))))).)))))))))))))))))))))))))))).))))).))))).....																							#MM	+/-
W_T_2324146_x2 ...........................................................................................................................................uuguggaacggaggaaguagguau.																							0	+
W_T_1427461_x4 ............................................................................................................................................uguggaacggaggaaguagguauu																							0	+
W_T_1956279_x4 .............................................................................................................................................guggaacggaggaaguagguauu																							0	+
RL_375509_x5 .............................................................................................................................................guggaacggaggaaguagguauu																							0	+
>novel_25
total read count 47
novel_25* read count 9
novel_25 read count 21
remaining read count 17
exp ************************fffffffffffffffffffffffffffffffffffffffffffffffffffffffffffffffffMMMMMMMMMMMMMMMMMMMMMMMM
pri_seq gagauccucuaacuuaagucacgugacuuugauucacugacauguagacccucuuugcuauggacacacaugucagugacucuaaaaucaccugacuuaaaguagaggaucuc
pri_struct (((((((((((..((((((((.((((.(((((.((((((((((((....((..........))....)))))))))))).)).))).)))).))))))))..)))))))))))																		#MM	+/-
W_T_1117602_x1 gagauccucuaacuuaagucacgu.........................................................................................																		0	+
W_T_2237701_x1 gagauccucuaacuuaagucacgu.........................................................................................																		0	-
W_T_2238859_x1 .agauccucuaacuuaagucacgu.........................................................................................																		0	-
RL_1253338_x1 ..gauccucuaacuuaagucacgu.........................................................................................																		0	-
W_T_2926312_x1 ..gauccucuaacuuaagucacguga.......................................................................................																		0	-
W_T_1379467_x1 ...auccucuaacuuaagucacgugac......................................................................................																		0	-
RL_2154118_x1 ...auccucuaacuuaagucacgugac......................................................................................																		0	-
RL_2616087_x2 ....uccucuaacuuaagucacgugacu.....................................................................................																		0	-
W_T_1545761_x2 ........................gacuuugauucacugacauguaga.................................................................																		0	+
W_T_1066667_x1 .........................acuuugauucacugacauguaga.................................................................																		0	+
W_T_2237340_x1 ............................uugauucacugacauguagacccu.............................................................																		0	-
RL_276705_x1 ................................uucacugacauguagacccucu...........................................................																		0	-
RL_406137_x1 .........................................auguagacccucuuugcuauggac................................................																		0	+
W_T_3043305_x1 ............................................uagacccucuuugcuauggacaca.............................................																		0	+
RL_1155767_x1 ....................................................cuuugcuauggacacacaugucag.....................................																		0	+
W_T_73877_x1 ..........................................................uauggacacacaugucagugacuc...............................																		0	+
RL_1215818_x2 ..........................................................uauggacacacaugucagugacuc...............................																		0	+
W_T_3331445_x1 ............................................................uggacacacaugucagugac.................................																		0	+
W_T_1438337_x1 ..............................................................gacacacaugucagugacu................................																		0	-
W_T_3287718_x1 ...............................................................acacacaugucagugacu................................																		0	-
RL_85348_x1 ................................................................cacacaugucagugacucuaaaau.........................																		0	+
W_T_2489083_x1 .......................................................................gucagugacucuaaaaucaccuga..................																		0	+
W_T_1080735_x1 ......................................................................................aucaccugacuuaaaguagagga....																		0	+
W_T_1529595_x1 ........................................................................................caccugacuuaaaguagaggaucu.																		0	+
W_T_911685_x9 .........................................................................................accugacuuaaaguagaggaucuc																		0	+
RL_1429767_x11 .........................................................................................accugacuuaaaguagaggaucuc																		0	+
>novel_26
total read count 18
novel_26* read count 0
novel_26 read count 18
remaining read count 0
exp ************************ffffffffffffffffffffffffffffffffffffffffffffffffffffffffffffffffffffffffffffffffffffffffffffffffffffffffffffffffffMMMMMMMMMMMMMMMMMMMMMMMM
pri_seq gcacguacucccuccgucccauaaaaaaccaaucuagcauaaaaugugacacacauccuauuacaaugaauauauacauaucucuguucagauuuguaguacuauaauaugucacaucugguucuagauuuauuuuuuauaggauggagaaaguacgugugu
pri_struct (((((((((..((((((((.((((((((..(((((((.((...((((((((.......((((((((((((((............))))))...))))))))........))))))))...)).)))))))..)))))))).))))))))..)))))))))..																							#MM	+/-
RL_1962467_x1 .........................................................................................................................................uauaggauggagaaaguacgugu..																							0	+
W_T_2628982_x3 .........................................................................................................................................uauaggauggagaaaguacgugug.																							0	+
RL_1429096_x1 .........................................................................................................................................uauaggauggagaaaguacgugug.																							0	+
W_T_1304443_x1 ..........................................................................................................................................auaggauggagaaaguacgugug.																							0	+
RL_1591307_x3 ..........................................................................................................................................auaggauggagaaaguacgugugu																							0	+
W_T_2733462_x8 ..........................................................................................................................................auaggauggagaaaguacgugugu																							0	+
W_T_1467699_x1 ...........................................................................................................................................uaggauggagaaaguacgugugu																							0	+
>novel_27
total read count 9
novel_27* read count 0
novel_27 read count 9
remaining read count 0
exp ************************fffffffffffffffffffffffffffffffffffffffMMMMMMMMMMMMMMMMMMMMMMMM
pri_seq cucccuucuaaaguauaagcuuuucuggcuaugcaucuagucggacuaugcgucggaacagaaaugcuuagauuuuggaacggagga
pri_struct ((((.(((((((((.(((((.((((((.(((((((..((((...))))))))).))..)))))).))))).))))))))).))))..															#MM	+/-
RL_2443579_x2 ...............................................................augcuuagauuuuggaacggagga															0	+
W_T_1567777_x6 ...............................................................augcuuagauuuuggaacggagga															0	+
W_T_1727465_x1 ..................................................................cuuagauuuuggaacggagga															0	+
>novel_28
total read count 89
novel_28* read count 0
novel_28 read count 89
remaining read count 0
exp *************************ffffffffffffffffffffffffffffffffffffffffffffffffffffffffffffffffffffffffffMMMMMMMMMMMMMMMMMMMMMMMMM
pri_seq gguaauauacuaauccgugcauccaucguauaucuuacacgucaugugaacgugcaucgguucauaauguuguguuuauaaauguuaaugguaugugugguugcacggguuuguauguugcaga
pri_struct .(((((((((.((((((((((.(((.((((((((..(((((.(((((((((........)))))).))).)))))..............))))))))))).)))))))))).)))))))))...																			#MM	+/-
RL_643520_x34 ...................................................................................................guugcacggguuuguauguugcaga																			0	+
W_T_410853_x53 ...................................................................................................guugcacggguuuguauguugcaga																			0	+
W_T_1886195_x1 ....................................................................................................uugcacggguuuguauguugcaga																			0	+
RL_2279491_x1 ........................................................................................................acggguuuguauguugcaga																			0	+
>novel_29
total read count 104
novel_29* read count 2
novel_29 read count 50
remaining read count 52
exp MMMMMMMMMMMMMMMMMMMMMMMMf*************************
pri_seq aucacugacacguggauccgacgaugucuggacucacauguuaaugauaa
pri_struct ((((.(((((.((((.((((((...))).))).)))).))))).))))..											#MM	+/-
W_T_238163_x8 aucacugacacguggauccgacga..........................											0	+
RL_372706_x14 aucacugacacguggauccgacga..........................											0	+
W_T_518248_x2 .ucacugacacguggauccgacgau.........................											0	+
RL_135103_x3 .ucacugacacguggauccgacgau.........................											0	+
W_T_1737540_x1 ..cacugacacguggauccgacga..........................											0	+
W_T_1625605_x1 ..cacugacacguggauccgacgau.........................											0	+
W_T_1355264_x2 ..cacugacacguggauccgacgaug........................											0	+
RL_1374670_x2 ...acugacacguggauccgacgaug........................											0	-
W_T_898169_x3 ....cugacacguggauccgacgauguc......................											0	-
RL_1342321_x1 .....ugacacguggauccgacgaugucu.....................											0	-
W_T_3182646_x1 .......acacguggauccgacgaugucu.....................											0	+
RL_2284126_x4 .......acacguggauccgacgaugucu.....................											0	+
RL_2657137_x1 ........cacguggauccgacgaugucu.....................											0	+
RL_2157213_x3 .........acguggauccgacgaugucu.....................											0	+
W_T_1454542_x3 .........acguggauccgacgaugucu.....................											0	+
W_T_2653606_x2 .........acguggauccgacgaugucuggac.................											0	-
W_T_1148001_x1 ...........guggauccgacgaugucu.....................											0	+
W_T_1002197_x1 ...........guggauccgacgaugucugga..................											0	-
W_T_88364_x19 ...........guggauccgacgaugucuggacuc...............											0	-
RL_138349_x14 ...........guggauccgacgaugucuggacuc...............											0	-
W_T_613101_x1 ...........guggauccgacgaugucuggacuca..............											0	+
W_T_3168290_x2 .............ggauccgacgaugucuggacucac.............											0	-
RL_229791_x1 .............ggauccgacgaugucuggacucac.............											0	-
RL_1395703_x1 ..............gauccgacgaugucuggacucac.............											0	-
RL_613997_x2 ...............auccgacgaugucuggacucacau...........											0	-
W_T_392232_x1 ...............auccgacgaugucuggacucacau...........											0	-
W_T_729178_x1 .................ccgacgaugucuggacucacaug..........											0	-
W_T_2271810_x1 .................ccgacgaugucuggacucacauguu........											0	-
RL_786132_x1 ...................gacgaugucuggacucacauguua.......											0	-
RL_1634749_x1 ....................acgaugucuggacucacauguuaa......											0	+
W_T_2761409_x1 ....................acgaugucuggacucacauguuaa......											0	+
RL_660639_x1 .....................cgaugucuggacucacauguu........											0	-
W_T_1971236_x1 ......................gaugucuggacucacauguu........											0	-
RL_398938_x1 ......................gaugucuggacucacauguu........											0	-
RL_2341320_x1 .......................augucuggacucacaugu.........											0	-
W_T_3251123_x1 .......................augucuggacucacaugu.........											0	-
