# Supplementary material for: Modification of Gene Expression, DNA Methylation and Small RNAs Expression in Rice Plants under In Vitro Culture
Source: MDPI journal article supplement (doi:10.3390/agronomy12071675), 2022-07-14
Supplement: s1 [file s1 › Table_S5.xlsx]

## Sheet: Table_S5
geneID	miRNA	Gene name	InterPro description
OS01G0100400	osa-miR1860-5p	-	Multicopper oxidase, type 2||Multicopper oxidase, type 1||Multicopper oxidase, type 3
OS01G0100600	osa-miR2121a	-	SUZ domain||Single-stranded nucleic acid binding R3H
OS01G0104800	osa-miR812a,osa-miR812s,osa-miR5799	-	Sas10 C-terminal domain
OS01G0104900	osa-miR5799,osa-miR812s,osa-miR812a,osa-miR815a,osa-miR812o-3p	-	Chloramphenicol acetyltransferase-like domain
OS01G0105400	osa-miR319a-3p.2-3p	-	P-loop containing nucleoside triphosphate hydrolase||Kinesin, motor domain||Kinesin-like protein
OS01G0105800	osa-miR1436	-	FeS cluster insertion protein||FeS cluster biogenesis||FeS cluster insertion, C-terminal, conserved site
OS01G0106700	osa-miR5526,osa-miR6248,osa-miR6252,osa-miR1439	-	PIK-related kinase, FATC||PIK-related kinase||Phosphatidylinositol 3-/4-kinase, catalytic domain||Armadillo-type fold||Protein kinase-like domain||Armadillo-like helical||Phosphatidylinositol 3/4-kinase, conserved site
OS01G0108800	osa-miR1426	-	Protein of unknown function DUF936, plant
OS01G0110100	osa-miR437	PHO1-1	SPX, N-terminal||EXS, C-terminal
OS01G0110700	osa-miR444d.3	-	Phosphoenolpyruvate carboxylase, bacterial/plant-type||Pyruvate/Phosphoenolpyruvate kinase-like domain||Phosphoenolpyruvate carboxylase||Phosphoenolpyruvate carboxylase, active site
OS01G0111200	osa-miR2863b	-	TFG box||Like-Sm (LSM) domain||FDF domain||Lsm14 N-terminal||DFDF domain||FFD box
OS01G0111500	osa-miR408-3p	-	Myc-type, basic helix-loop-helix (bHLH) domain
OS01G0111600	osa-miR6248	-	Phosphatidylethanolamine-binding, conserved site||Phosphatidylethanolamine-binding protein PEBP||TERMINAL FLOWER 1-like
OS01G0115750	osa-miR812a	-	Protein kinase domain||Serine/threonine-protein kinase, active site||Serine/threonine- / dual specificity protein kinase, catalytic domain||Protein kinase-like domain||Protein kinase, ATP binding site||Concanavalin A-like lectin/glucanase, subgroup
OS01G0116000	osa-miR5500	-	Protein kinase domain||Concanavalin A-like lectin/glucanase, subgroup||Serine/threonine- / dual specificity protein kinase, catalytic domain||Protein kinase-like domain||Serine/threonine-protein kinase, active site||Protein kinase, ATP binding site
OS01G0116900	osa-miR1860-5p,osa-miR1860-3p	-	Protein kinase, ATP binding site||Protein kinase-like domain||Serine/threonine- / dual specificity protein kinase, catalytic domain||Serine/threonine-protein kinase, active site||Concanavalin A-like lectin/glucanase, subgroup||Protein kinase domain
OS01G0118100	osa-miR1862e,osa-miR396a-3p	-	Helicase, C-terminal||Domain of unknown function DUF1605||Helicase-associated domain||P-loop containing nucleoside triphosphate hydrolase||Helicase, superfamily 1/2, ATP-binding domain||Double-stranded RNA-binding domain
OS01G0120300	novel_4	-	Aminoacyl-tRNA synthetase, class 1a, anticodon-binding||Valyl/Leucyl/Isoleucyl-tRNA synthetase, class I, anticodon-binding||Aminoacyl-tRNA synthetase, class Ia||Valyl/Leucyl/Isoleucyl-tRNA synthetase, editing domain||Leucine-tRNA ligase, bacterial/mitochondrial||Leucyl-tRNA synthetase, editing domain||Rossmann-like alpha/beta/alpha sandwich fold
OS01G0120600	osa-miR529a	-	Riboflavin synthase-like beta-barrel||Oxidoreductase FAD/NAD(P)-binding||Phenol hydroxylase reductase
OS01G0120800	osa-miR444d.3	-	Proteasome component (PCI) domain||Eukaryotic translation initiation factor 3 subunit A
OS01G0121950	osa-miR156f-3p	-	Zinc finger, SIAH-type||Seven-in-absentia protein, TRAF-like domain||SIAH-type domain||E3 ubiquitin-protein ligase SINA like
OS01G0125900	osa-miR156k	-	Ubiquitin-conjugating enzyme, E2||Ubiquitin-conjugating enzyme/RWD-like
OS01G0126100	osa-miR5493,osa-miR408-3p	-	Multicopper oxidase, type 2||Multicopper oxidase, type 1||Multicopper oxidase, type 3||Multicopper oxidase, copper-binding site
OS01G0126200	osa-miR396c-5p	-	Multicopper oxidase, type 2
OS01G0128200	osa-miR1436	-	S1/P1 nuclease||Phospholipase C/P1 nuclease domain
OS01G0134900	osa-miR1439	-	Galactose-binding domain-like||Carbohydrate-binding, CenC-like||Glycoside hydrolase, catalytic domain||Glycoside hydrolase, family 10||Glycoside hydrolase, superfamily
OS01G0135700	osa-miR5493	CML16	EF-Hand 1, calcium-binding site||EF-hand domain||EF-hand domain pair
OS01G0136700	osa-miR5160	-	Wall-associated receptor kinase galacturonan-binding domain
OS01G0136800	osa-miR1436	-	Protein kinase domain||Serine/threonine-protein kinase, active site||Serine/threonine- / dual specificity protein kinase, catalytic domain||Protein kinase-like domain||Wall-associated receptor kinase galacturonan-binding domain||Protein kinase, ATP binding site||Concanavalin A-like lectin/glucanase, subgroup
OS01G0137400	osa-miR812k,osa-miR1439,osa-miR812n-5p	-	Protein kinase domain||Serine/threonine-protein kinase, active site||Serine/threonine- / dual specificity protein kinase, catalytic domain||Protein kinase-like domain||Wall-associated receptor kinase galacturonan-binding domain||Protein kinase, ATP binding site||Concanavalin A-like lectin/glucanase, subgroup
OS01G0138400	osa-miR5542	-	Protein kinase domain||Concanavalin A-like lectin/glucanase, subgroup||Protein kinase, ATP binding site||Serine/threonine- / dual specificity protein kinase, catalytic domain||Serine/threonine-protein kinase, active site||Wall-associated receptor kinase galacturonan-binding domain||Protein kinase-like domain
OS01G0141300	osa-miR6248,osa-miR1425-3p	-	P-loop containing nucleoside triphosphate hydrolase||Vps4 oligomerisation, C-terminal||ATPase, AAA-type, core||AAA+ ATPase domain
OS01G0142500	osa-miR169f.2,osa-miR156c-3p	-	SANT/Myb domain||Myb domain, plants||Myb domain||Myb-like domain
OS01G0147900	osa-miR815a	TPI	Triosephosphate isomerase, active site||Triosephosphate isomerase, bacterial/eukaryotic||Aldolase-type TIM barrel||Triosephosphate isomerase
OS01G0148400	osa-miR167e-3p	-	Brix domain||Ribosome biogenesis protein BRX1
OS01G0149350	osa-miR2118c,osa-miR2118f	-	P-loop containing nucleoside triphosphate hydrolase||Leucine-rich repeat
OS01G0149500	osa-miR2118c,osa-miR2118f	-	P-loop containing nucleoside triphosphate hydrolase
OS01G0150100	osa-miR6248	-	Terpenoid cyclases/protein prenyltransferase alpha-alpha toroid
OS01G0150200	osa-miR812o-5p	PAS2B	Protein-tyrosine phosphatase-like, PTPLA
OS01G0153400	osa-miR5788,osa-miR7694-3p	-	Aminoacyl-tRNA synthetase, class II (D/K/N)-like||GAD domain||Aminoacyl-tRNA synthetase, class II||Aspartate-tRNA ligase, class IIb, bacterial/mitochondrial-type||Aminoacyl-tRNA synthetase, class II (D/K/N)||Aspartyl/Asparaginyl-tRNA synthetase, class IIb
OS01G0153600	osa-miR812s,osa-miR812a	-	Protein of unknown function DUF674
OS01G0155000	osa-miR6249a	-	Alpha/beta hydrolase fold-3||Alpha/Beta hydrolase fold
OS01G0157900	osa-miR1436	-	Uncharacterised protein family Cys-rich
OS01G0158900	osa-miR156k,osa-miR2275a	-	Zinc finger, NF-X1-type||Zinc finger, PHD-type, conserved site||Zinc finger, RING-type
OS01G0160100	osa-miR815a	-	Thiamin diphosphate-binding fold||Thiamine pyrophosphate enzyme, central domain||DHS-like NAD/FAD-binding domain||Thiamine pyrophosphate enzyme, N-terminal TPP-binding domain||Thiamine pyrophosphate (TPP)-dependent enzyme||Thiamine pyrophosphate enzyme, C-terminal TPP-binding
OS01G0162800	osa-miR5339	-	Leucine-rich repeat, typical subtype||Leucine-rich repeat||Leucine-rich repeat-containing N-terminal, type 2
OS01G0164400	novel_3	-	Nucleotide-binding, alpha-beta plait||RNA recognition motif domain
OS01G0164800	osa-miR5825,osa-miR5831	-	Breast cancer type 2 susceptibility protein||BRCA2, oligonucleotide/oligosaccharide-binding 3||Nucleic acid-binding, OB-fold
OS01G0168500	osa-miR6248,osa-miR812o-5p,osa-miR812q	-	WD40-repeat-containing domain||WD40 repeat||WD40/YVTN repeat-like-containing domain
OS01G0169500	osa-miR6248,osa-miR812o-3p,osa-miR1436,osa-miR812n-5p,osa-miR812a,osa-miR812o-5p	-	Armadillo-like helical||Armadillo-type fold||Domain of unknown function DUF3730
OS01G0169900	novel_3	-	Protein of unknown function DUF1421
OS01G0170500	osa-miR818a	-	Domain of unknown function DUF239||Domain of unknown function DUF4409
OS01G0170600	osa-miR393b-3p	-	Universal stress protein A||Rossmann-like alpha/beta/alpha sandwich fold
OS01G0177400	novel_3	-	Non-haem dioxygenase N-terminal domain||Isopenicillin N synthase-like||Oxoglutarate/iron-dependent dioxygenase
OS01G0182700	osa-miR812o-5p	-	DNA-binding WRKY
OS01G0183100	osa-miR3979-5p	-	WD40/YVTN repeat-like-containing domain||WD40 repeat||WD40-repeat-containing domain||BING4, C-terminal domain||WD40 repeat, conserved site
OS01G0185100	osa-miR1860-5p	-	Protein of unknown function DUF1664
OS01G0186400	osa-miR818a,osa-miR1439	-	Zinc finger, C2H2
OS01G0187900	osa-miR1436	-	Zinc finger, CCHC-type||SANT/Myb domain||Myb domain||Myb domain, plants
OS01G0188100	osa-miR1439	-	Oxoglutarate/iron-dependent dioxygenase||Isopenicillin N synthase-like||Non-haem dioxygenase N-terminal domain||Isopenicillin N synthase
OS01G0188900	osa-miR1431	-	Ankyrin repeat-containing domain||Ankyrin repeat
OS01G0189100	osa-miR390-3p,osa-miR820a	-	Ankyrin repeat||Ubiquitin-related domain||Tetratricopeptide-like helical||Ubiquitin domain||Ankyrin repeat-containing domain
OS01G0189700	osa-miR169i-5p.2,osa-miR1436	-	Ankyrin repeat-containing domain||Tetratricopeptide-like helical||Ankyrin repeat
OS01G0190300	osa-miR2905,novel_3	IAA2	Phox/Bem1p||AUX/IAA protein
OS01G0191200	osa-miR6248,osa-miR1436	-	Acid phosphatase, plant||Vegetative storage protein/acid phosphatase||Acid phosphatase (Class B)||HAD-like domain
OS01G0192300	novel_3	-	Zinc finger, CCHC-type||SANT/Myb domain||Myb domain, plants||Myb domain
OS01G0193900	osa-miR5083	-	Protein LIN-9/Protein ALWAYS EARLY||SANT domain||SANT/Myb domain
OS01G0195000	novel_3	-	Zinc finger C2H2-type/integrase DNA-binding domain||C2H2 zinc finger protein, plant||Zinc finger, C2H2||Zinc finger, C2H2-like
OS01G0197200	osa-miR5517	-	RNA helicase, ATP-dependent, DEAD-box, conserved site||Helicase, C-terminal||DNA/RNA helicase, DEAD/DEAH box type, N-terminal||P-loop containing nucleoside triphosphate hydrolase||Helicase, superfamily 1/2, ATP-binding domain||RNA helicase, DEAD-box type, Q motif
OS01G0197700	osa-miR6248	CKX2	FAD-linked oxidase-like, C-terminal||Vanillyl-alcohol oxidase/Cytokinin dehydrogenase C-terminal domain||FAD-binding, type 2||CO dehydrogenase flavoprotein-like, FAD-binding, subdomain 2||FAD-binding, type 2, subdomain 1||FAD linked oxidase, N-terminal||Cytokinin dehydrogenase 1, FAD/cytokinin binding domain
OS01G0198000	osa-miR1436,osa-miR818a	RDR4	RNA-dependent RNA polymerase, eukaryotic-type
OS01G0198200	osa-miR1436	-	Protein kinase-like domain||Serine/threonine- / dual specificity protein kinase, catalytic domain||Serine/threonine-protein kinase, active site||Protein kinase domain
OS01G0199400	osa-miR5162	-	Alpha/Beta hydrolase fold||Putative lysophospholipase||Alpha/beta hydrolase fold-1
OS01G0199700	osa-miR395f	-	Protein of unknown function DUF1677, plant
OS01G0200400	osa-miR2121a	-	Thioredoxin-like fold
OS01G0200700	osa-miR1846a-3p	MT3A	-
OS01G0201400	novel_3	-	Rapid ALkalinization Factor
OS01G0201700	osa-miR5827,osa-miR156c-3p,osa-miR437	-	Transcription factor, MADS-box
OS01G0208600	osa-miR396a-3p	-	WH2 domain||SCAR/WAVE family
OS01G0209500	osa-miR1436	-	Zinc finger, RING-type||Zinc finger, RING/FYVE/PHD-type
OS01G0212100	osa-miR156k,osa-miR5825,osa-miR437	-	P-loop containing nucleoside triphosphate hydrolase||DNA/RNA helicase, ATP-dependent, DEAH-box type, conserved site||Helicase, superfamily 1/2, ATP-binding domain||Helicase, C-terminal||Domain of unknown function DUF1605||Helicase-associated domain
OS01G0214300	osa-miR1436	-	NET domain
OS01G0214600	osa-miR5819	-	SGNH hydrolase-type esterase domain||Lipase, GDSL
OS01G0216300	osa-miR6248	-	Lipase, GDSL||SGNH hydrolase-type esterase domain
OS01G0216900	novel_3	-	Lipase, GDSL||SGNH hydrolase-type esterase domain
OS01G0218032	osa-miR818a,osa-miR1436	-	Demeter, RRM-fold domain
OS01G0220300	osa-miR1436,osa-miR1439	-	Translation elongation factor EF1B/ribosomal protein S6||Ribosomal protein S6
OS01G0221100	osa-miR6249a	GH3.3	GH3 auxin-responsive promoter||GH3 protein, group I
OS01G0223200	osa-miR5161	-	SGNH hydrolase-type esterase domain||Lipase, GDSL
OS01G0226600	osa-miR5536	-	S-type anion channel||Voltage-dependent anion channel
OS01G0226700	osa-miR1441	-	Ovate protein family, C-terminal
OS01G0227500	osa-miR1436	-	Cytochrome P450, E-class, group I||Cytochrome P450||Cytochrome P450, conserved site
OS01G0228500	osa-miR818a,osa-miR1436	-	Late embryogenesis abundant protein, LEA-14
OS01G0229400	osa-miR5498	-	Small GTPase superfamily||Small GTPase superfamily, Rab type||P-loop containing nucleoside triphosphate hydrolase||Small GTPase superfamily, Rho type||Small GTP-binding protein domain||Small GTPase superfamily, Ras type
OS01G0229700	osa-miR396a-5p	-	WD40 repeat||WD40/YVTN repeat-like-containing domain||Armadillo-like helical||Quinonprotein alcohol dehydrogenase-like superfamily||U box domain||Armadillo-type fold||Zinc finger, RING/FYVE/PHD-type
OS01G0229900	osa-miR5502	-	Ubiquitin-conjugating enzyme, E2||Ubiquitin-conjugating enzyme/RWD-like
OS01G0230200	osa-miR1436,osa-miR1439	-	Myc-type, basic helix-loop-helix (bHLH) domain
OS01G0232500	osa-miR5788	-	Ubiquitin-conjugating enzyme, E2||Ubiquitin-conjugating enzyme/RWD-like
OS01G0233800	osa-miR1436	-	Protein kinase domain||Pleckstrin homology-like domain||Serine/threonine-protein kinase, active site||Serine/threonine- / dual specificity protein kinase, catalytic domain||Protein kinase-like domain
OS01G0234200	osa-miR1436	-	DNA topoisomerase, type IIA, subunit B, domain 2||Ribosomal protein S5 domain 2-type fold, subgroup||DNA topoisomerase, type IIA||Ribosomal protein S5 domain 2-type fold||Histidine kinase-like ATPase, ATP-binding domain
OS01G0234800	osa-miR3979-3p	-	Longin domain||Longin-like domain
OS01G0237000	osa-miR1439	-	Uncharacterised protein family UPF0497, trans-membrane plant subgroup||Uncharacterised protein family UPF0497, trans-membrane plant
OS01G0240600	osa-miR1846d-3p	-	Domain of unknown function DUF1618
OS01G0242300	osa-miR1864	-	Optic atrophy 3-like
OS01G0242500	osa-miR1846e,osa-miR1846a-5p	-	D-Tyr tRNAtyr deacylase-like domain||D-tyrosyl-tRNA(Tyr) deacylase
OS01G0242600	osa-miR3981-5p,osa-miR5522	-	C2 domain
OS01G0243200	osa-miR2905	-	Biopterin transport-related protein BT1||Major facilitator superfamily domain
OS01G0245700	osa-miR408-5p	-	Domain of unknown function DUF1618
OS01G0247700	novel_3	-	S-type anion channel||Voltage-dependent anion channel
OS01G0248600	osa-miR818a,osa-miR1436	-	GINS complex, subunit Psf2||GINS complex
OS01G0254100	osa-miR1436	-	WD40 repeat||Topless family||CTLH, C-terminal LisH motif||LisH dimerisation motif||Quinonprotein alcohol dehydrogenase-like superfamily||WD40/YVTN repeat-like-containing domain||WD40-repeat-containing domain||WD40 repeat, conserved site
OS01G0256400	osa-miR1436,osa-miR818a	-	Dynein light chain, type 1/2||Dynein light chain, type 1/2, conserved site
OS01G0256900	osa-miR6248	-	Ribonucleoprotein LSM domain||Like-Sm (LSM) domain||U6 snRNA-associated Sm-like protein LSm4/Small nuclear ribonucleoprotein Sm D1/D3
OS01G0260500	osa-miR437,osa-miR6248	-	Leucine-rich repeat, typical subtype||P-loop containing nucleoside triphosphate hydrolase||Leucine-rich repeat
OS01G0261200	osa-miR1439,osa-miR5799	NAC74	NAC domain||-
OS01G0263500	novel_3	-	Mediator complex, subunit Med27
OS01G0266000	osa-miR395f	-	Winged helix-turn-helix DNA-binding domain||RNA-binding protein Lupus La||Protein of unknown function DM15
OS01G0267100	osa-miR6249a	-	S-adenosyl-L-methionine-dependent methyltransferase-like||DNA methylase, N-6 adenine-specific, conserved site
OS01G0268300	osa-miR6248	GYRB	DNA topoisomerase, type IIA, central domain||DNA topoisomerase, type IIA, conserved site||Ribosomal protein S5 domain 2-type fold, subgroup||DNA topoisomerase, type IIA||Ribosomal protein S5 domain 2-type fold||DNA gyrase, subunit B||Histidine kinase-like ATPase, ATP-binding domain||DNA topoisomerase, type IIA, subunit B||DNA gyrase B subunit, C-terminal||DNA topoisomerase, type IIA, subunit B, d…
OS01G0268600	osa-miR1849	-	Glycoside hydrolase, family 31||Galactose mutarotase-like domain||Glycoside hydrolase, superfamily
OS01G0270100	osa-miR815a	-	Proteinase inhibitor I25, cystatin, conserved region||Proteinase inhibitor I25, cystatin, conserved site||Proteinase inhibitor I25, cystatin
OS01G0274100	osa-miR3981-5p	-	Flavin monooxygenase-like||Pyridine nucleotide-disulphide oxidoreductase, class-II
OS01G0275600	osa-miR437	AGO4A	Ribonuclease H-like domain||Stem cell self-renewal protein Piwi||Argonaute/Dicer protein, PAZ domain||Domain of unknown function DUF1785
OS01G0276700	osa-miR815a	-	Pyruvate/Phosphoenolpyruvate kinase-like domain||Pyruvate kinase-like, insert domain||Pyruvate kinase, C-terminal||Pyruvate kinase, barrel||Pyruvate kinase, beta-barrel insert domain||Pyruvate kinase||Pyruvate kinase, alpha/beta||Pyruvate kinase, active site
OS01G0277500	osa-miR812g	-	Zinc finger, Dof-type
OS01G0277600	osa-miR5522	-	HAD-like domain||P-type ATPase, phosphorylation site||Cation-transporting P-type ATPase||P-type ATPase, A domain||Cation-transporting P-type ATPase, subfamily IV||Phospholipid-transporting P-type ATPase||P-type ATPase, cytoplasmic domain N
OS01G0279000	osa-miR3979-5p	-	Zinc finger, DHHC-type, palmitoyltransferase
OS01G0279100	osa-miR1427	-	Magnesium-protoporphyrin IX monomethyl ester aerobic oxidative cyclase||Ferritin-like superfamily
OS01G0279400	osa-miR5788,osa-miR3981-3p	-	Major facilitator superfamily||Major facilitator superfamily domain
OS01G0286600	osa-miR1848,osa-miR1428e-3p	PPOX1	Protoporphyrinogen oxidase, C-terminal domain||Amine oxidase||Protoporphyrinogen oxidase
OS01G0289600	osa-miR1436	-	DNA-binding WRKY
OS01G0290100	osa-miR3979-3p	-	Pyridoxal phosphate-dependent transferase, major region, subdomain 1||Pyridoxal phosphate-dependent transferase||Aminotransferase, class V/Cysteine desulfurase
OS01G0294700	osa-miR1862f	-	Peroxidase, active site||Plant peroxidase||Haem peroxidase||Haem peroxidase, plant/fungal/bacterial
OS01G0296900	osa-miR5788	-	WAT1-related protein
OS01G0298400	novel_3	-	SANT/Myb domain||Myb domain
OS01G0299400	osa-miR156a,osa-miR156l-5p	-	IGR protein motif
OS01G0301000	osa-miR5819	-	Tetratricopeptide-like helical||Pentatricopeptide repeat
OS01G0301500	osa-miR1436	-	Tetratricopeptide-like helical||Pentatricopeptide repeat
OS01G0303200	osa-miR5810	-	FAM91, N-terminal domain||FAM91, C-terminal domain
OS01G0305900	osa-miR437,osa-miR5833	-	SANT/Myb domain||Myb domain
OS01G0307500	osa-miR6249a	HKT8	Cation transporter
OS01G0308300	osa-miR2118f,osa-miR2118g,osa-miR2118c,osa-miR2118e	-	P-loop containing nucleoside triphosphate hydrolase
OS01G0310800	osa-miR167h-3p	-	Protein kinase, ATP binding site||Protein kinase-like domain||Serine/threonine- / dual specificity protein kinase, catalytic domain||Protein kinase domain||Serine-threonine/tyrosine-protein kinase catalytic domain
OS01G0312500	osa-miR5799	-	Pectin lyase fold||Pectinesterase inhibitor domain||Pectinesterase, active site||Pectin lyase fold/virulence factor||Pectinesterase, catalytic
OS01G0316100	osa-miR160d-3p	-	FAD dependent oxidoreductase
OS01G0321300	osa-miR1848	-	SecA motor DEAD||Protein translocase subunit SecA||SecA DEAD-like, N-terminal||SecA preprotein, cross-linking domain||P-loop containing nucleoside triphosphate hydrolase
OS01G0323300	osa-miR1436	-	RNA-binding, CRM domain
OS01G0323950	osa-miR5819	-	Zinc finger, CCHC-type
OS01G0326000	osa-miR818a	-	Peroxidases heam-ligand binding site||Haem peroxidase, plant/fungal/bacterial||Peroxidase, active site||Plant peroxidase||Haem peroxidase
OS01G0326100	osa-miR3981-5p,osa-miR2121a,osa-miR1436,osa-miR1439	-	Haem peroxidase, plant/fungal/bacterial||Haem peroxidase||Peroxidase, active site
OS01G0327100	osa-miR5788,osa-miR2121a	-	Peroxidases heam-ligand binding site||Haem peroxidase, plant/fungal/bacterial||Peroxidase, active site||Plant peroxidase||Haem peroxidase
OS01G0328400	osa-miR1437a	RPS27AA	Ubiquitin domain||Ubiquitin conserved site||Ribosomal protein S27a||Zinc-binding ribosomal protein||Ubiquitin-related domain||-
OS01G0329000	osa-miR5831,osa-miR5162	-	Phospholipid/glycerol acyltransferase
OS01G0329900	osa-miR6248,osa-miR1862f,osa-miR812o-5p,osa-miR156k	-	SGNH hydrolase-type esterase domain||Lipase, GDSL
OS01G0331100	osa-miR818a,osa-miR1436	-	Lipase, GDSL||SGNH hydrolase-type esterase domain
OS01G0332200	osa-miR1439,osa-miR1857-5p,osa-miR1436,osa-miR818a	-	Oxoglutarate/iron-dependent dioxygenase||Non-haem dioxygenase N-terminal domain||Isopenicillin N synthase-like||Isopenicillin N synthase
OS01G0337600	osa-miR1436,osa-miR6248,osa-miR5161	-	Armadillo-type fold||Domain of unknown function DUF625||Pleckstrin homology-like domain||Armadillo-like helical
OS01G0338200	osa-miR1436,osa-miR1439,osa-miR5826	-	JAB/MPN domain||USP8 dimerisation domain
OS01G0339600	osa-miR2121a	-	Proteasome assembly chaperone 3
OS01G0348800	osa-miR5831	-	Mannose-binding lectin
OS01G0350000	osa-miR1846e	-	Chloramphenicol acetyltransferase-like domain
OS01G0350900	osa-miR437	-	Zinc finger, RING/FYVE/PHD-type||Zinc finger, RING-type
OS01G0351100	osa-miR1428b	PARP2-B	Poly(ADP-ribose) polymerase, regulatory domain||Poly(ADP-ribose) polymerase, catalytic domain
OS01G0355500	osa-miR437,osa-miR5819	-	DnaJ domain
OS01G0356400	osa-miR812o-3p,osa-miR812p,osa-miR812g,osa-miR812o-5p,osa-miR812a,osa-miR812s,osa-miR812f	-	AAA+ ATPase domain||ABC transporter-like||ABC transporter type 1, transmembrane domain||P-loop containing nucleoside triphosphate hydrolase||ABC transporter, conserved site
OS01G0356500	osa-miR5825,osa-miR437,osa-miR814a,osa-miR5831	TPK2	Thiamin pyrophosphokinase, eukaryotic||Thiamin pyrophosphokinase||Thiamin pyrophosphokinase, catalytic domain||Thiamin pyrophosphokinase, vitamin B1-binding domain
OS01G0356800	osa-miR2872	-	P-loop containing nucleoside triphosphate hydrolase||Domain of unknown function DUF3406, chloroplast translocase
OS01G0358300	osa-miR6248	-	Tetratricopeptide repeat||Tetratricopeptide repeat-containing domain||Tetratricopeptide-like helical||Protein of unknown function DUF3493
OS01G0363900	osa-miR444b.2,osa-miR1436	-	Exportin-1/Importin-beta-like||Armadillo-type fold||Armadillo-like helical
OS01G0364400	osa-miR5816,osa-miR818a	-	Serine/threonine- / dual specificity protein kinase, catalytic domain||Serine/threonine-protein kinase, active site||Protein kinase-like domain||Concanavalin A-like lectin/glucanase, subgroup||Protein kinase domain||Wall-associated receptor kinase galacturonan-binding domain||Protein kinase, ATP binding site||EGF-like calcium-binding domain||EGF-like calcium-binding, conserved site||Epidermal gro…
OS01G0365000	osa-miR6248	-	EGF-like calcium-binding domain||Protein kinase, ATP binding site||Wall-associated receptor kinase galacturonan-binding domain||Insulin-like growth factor binding protein, N-terminal||EGF-like calcium-binding, conserved site||Epidermal growth factor-like domain||Serine/threonine-protein kinase, active site||Serine/threonine- / dual specificity protein kinase, catalytic domain||Protein kinase-like…
OS01G0365300	osa-miR812s,osa-miR812a	-	Domain of unknown function DUF239
OS01G0367100	osa-miR3981-5p	-	NAD(P)-binding domain
OS01G0369200	osa-miR1428a-5p	-	Cullin protein, neddylation domain||Cullin repeat-like-containing domain||Cullin, N-terminal||Cullin homology||Winged helix-turn-helix DNA-binding domain
OS01G0371400	osa-miR5526	-	Thioredoxin-like fold||Glutathione S-transferase, C-terminal||Glutathione S-transferase, C-terminal-like||Glutathione S-transferase, N-terminal
OS01G0372700	osa-miR1848	-	Asparagine-tRNA ligase||S15/NS1, RNA-binding||Aminoacyl-tRNA synthetase, class II||Nucleic acid-binding, OB-fold||Aminoacyl-tRNA synthetase, class II (D/K/N)-like||Aminoacyl-tRNA synthetase, class II (D/K/N)||Aspartyl/Asparaginyl-tRNA synthetase, class IIb||OB-fold nucleic acid binding domain, AA-tRNA synthetase-type
OS01G0375200	osa-miR1436,osa-miR818a	-	Shikimate dehydrogenase substrate binding, N-terminal||Quinate/shikimate 5-dehydrogenase/glutamyl-tRNA reductase||Shikimate, quinate/shikimate dehydrogenase||Aldolase-type TIM barrel||Dehydroquinase class I||Shikimate dehydrogenase||NAD(P)-binding domain
OS01G0376700	osa-miR3979-3p	SPP1	Sucrose-phosphate synthase||HAD-superfamily hydrolase, subfamily IIB||Sucrose phosphatase, plant/cyanobacteria||HAD-like domain||Sucrose-phosphate phosphatase||Sucrose-6-phosphate phosphohydrolase C-terminal
OS01G0377000	novel_3	-	Cytochrome P450||Cytochrome P450, E-class, group I||Cytochrome P450, conserved site
OS01G0382200	osa-miR1436,osa-miR1876	-	Chloramphenicol acetyltransferase-like domain
OS01G0383900	osa-miR1436,osa-miR818a	-	Peptidase S59, nucleoporin
OS01G0388700	osa-miR818f	-	Protein of unknown function DUF679
OS01G0390400	osa-miR5802,osa-miR1879	-	S-adenosyl-L-methionine-dependent methyltransferase-like||SAM-dependent methyltransferase TRM5/TYW2-type||tRNA (guanine(37)-N(1))-methyltransferase, eukaryotic
OS01G0390900	osa-miR2121a	-	Dual specificity phosphatase||Dual specificity phosphatase, subgroup, catalytic domain||Protein-tyrosine phosphatase, catalytic||Protein-tyrosine/Dual specificity phosphatase||Protein-tyrosine phosphatase-like||Dual specificity phosphatase, catalytic domain
OS01G0499300	osa-miR1436	-	JAB/MPN domain||USP8 dimerisation domain
OS01G0501700	osa-miR1436	TATC	Sec-independent periplasmic protein translocase, conserved site||Sec-independent periplasmic protein translocase TatC
OS01G0502300	osa-miR812o-3p,osa-miR812o-5p,osa-miR812s,osa-miR812a,osa-miR1439	-	HotDog domain||Acyl-ACP thioesterase
OS01G0503400	osa-miR2905	NRAMP4	Natural resistance-associated macrophage like||-
OS01G0505500	osa-miR396c-5p	-	Pentatricopeptide repeat||Tetratricopeptide-like helical
OS01G0506200	osa-miR812s,osa-miR812a,osa-miR1436,osa-miR5825,osa-miR812v,osa-miR812n-3p	-	Tetratricopeptide repeat-containing domain||Tetratricopeptide repeat||Tetratricopeptide-like helical
OS01G0507300	osa-miR5152-5p	-	Protein of unknown function DUF92, TMEM19
OS01G0508000	osa-miR812n-5p,osa-miR812f,osa-miR812p,osa-miR812g	BGLU1	Glycoside hydrolase, superfamily||Glycoside hydrolase, catalytic domain||Glycoside hydrolase, family 1
OS01G0510800	osa-miR396a-5p,osa-miR396c-5p	-	Armadillo-type fold||Armadillo-like helical||TATA box binding protein associated factor (TAF)||Domain of unknown function DUF1546
OS01G0512100	osa-miR1436,osa-miR812f,osa-miR812n-5p,osa-miR812s,osa-miR812g,osa-miR528-5p,osa-miR1439,osa-miR812p,osa-miR172d-5p	-	DnaJ domain, conserved site||DnaJ domain
OS01G0513200	osa-miR1439,osa-miR1436,osa-miR818a	-	Mitochondrial carrier protein||Mitochondrial carrier domain||Mitochondrial substrate/solute carrier
OS01G0514000	osa-miR2872	-	Ribosomal protein L24e-related||Ribosomal protein L24e domain||Ribosome biogenesis protein RLP24||Ribosomal protein L24e, conserved site||TRASH domain
OS01G0514700	osa-miR1846d-3p	-	Leucine-rich repeat-containing N-terminal, type 2||Protein kinase-like domain||Leucine-rich repeat||Leucine-rich repeat, typical subtype||Tyrosine-protein kinase, active site||Protein kinase domain
OS01G0515300	osa-miR390-5p	-	Leucine-rich repeat, typical subtype||Leucine-rich repeat||Leucine-rich repeat-containing N-terminal, type 2
OS01G0516600	osa-miR1436,osa-miR1439	-	Stress responsive alpha-beta barrel||Dimeric alpha-beta barrel
OS01G0516900	osa-miR1436	-	AAA+ ATPase domain||Plant PDR ABC transporter associated||ABC-2 type transporter||P-loop containing nucleoside triphosphate hydrolase||ABC transporter, conserved site||ABC-transporter extracellular N-terminal domain||ABC transporter-like
OS01G0517900	osa-miR5833	-	Heat shock protein 70kD, peptide-binding domain||Heat shock protein 70 family||Heat shock protein 70kD, C-terminal domain
OS01G0518500	osa-miR818a	-	Glycoside hydrolase, superfamily||Aldolase-type TIM barrel||Glycosyl hydrolase, family 13, all-beta||Glycoside hydrolase, family 27||Ricin B lectin domain
OS01G0521500	osa-miR5161	-	DnaJ domain||Protein of unknown function DUF3752
OS01G0522400	osa-miR2275a	-	Armadillo-like helical||Armadillo-type fold
OS01G0524700	osa-miR6248	-	26S proteasome non-ATPase regulatory subunit 5||Armadillo-type fold||Armadillo-like helical
OS01G0526200	osa-miR1442	-	Apoptosis-antagonizing transcription factor, C-terminal||AATF leucine zipper-containing domain
OS01G0527400	osa-miR1436,osa-miR5788	-	Transcription elongation factor S-IIM||Bromo adjacent homology (BAH) domain||Transcription elongation factor S-II, central domain
OS01G0527900	osa-miR1425-5p	-	No apical meristem-associated, C-terminal domain
OS01G0528800	osa-miR815a,osa-miR3981-3p	-	NAD-dependent epimerase/dehydratase||NAD(P)-binding domain
OS01G0530400	osa-miR1436	GRXS4	Monothiol glutaredoxin-related||-||Thioredoxin-like fold
OS01G0531200	osa-miR1862e	-	Aminotransferase-like, plant mobile domain||Phospholipase C, phosphatidylinositol-specific, Y domain
OS01G0533000	osa-miR5079a,osa-miR160d-3p,osa-miR1879	-	Glycosyl transferase, family 48||Callose synthase
OS01G0534900	osa-miR2905	-	Domain of unknown function DUF221||Domain of unknown function DUF4463
OS01G0541900	osa-miR5512a	-	Protein phosphatase 2C (PP2C)-like domain||Protein kinase domain||Serine/threonine- / dual specificity protein kinase, catalytic domain||Serine/threonine-protein kinase, active site||Protein kinase-like domain
OS01G0543100	osa-miR5801,osa-miR2873b	-	Peroxidase, active site||Plant peroxidase||Haem peroxidase||Peroxidases heam-ligand binding site||Haem peroxidase, plant/fungal/bacterial
OS01G0544200	osa-miR5788	-	Cytochrome P450, E-class, group I||Cytochrome P450
OS01G0547000	osa-miR1847.1	-	P-loop containing nucleoside triphosphate hydrolase
OS01G0547200	osa-miR1436	-	Zinc finger, BED-type predicted
OS01G0548750	osa-miR435	-	Gnk2-homologous domain
OS01G0550100	osa-miR1439,osa-miR1436	-	Peptidase C19, ubiquitin carboxyl-terminal hydrolase 2, conserved site||Ubiquitin-related domain||Ubiquitin domain||Ubiquitin carboxyl-terminal hydrolase-like domain||Ubiquitin carboxyl-terminal hydrolases family 2
OS01G0550200	osa-miR818a,osa-miR1436	-	F-box domain
OS01G0550900	osa-miR814a	-	Domain of unknown function DUF239||Domain of unknown function DUF4409
OS01G0551800	osa-miR1439,osa-miR1436	-	ABI family
OS01G0555600	osa-miR393b-3p	-	Dynein light chain, type 1/2
OS01G0556800	osa-miR437	-	Protein of unknown function DUF724||Agenet-like domain||Tudor-like, plant
OS01G0558300	osa-miR818a	-	Ubiquitin-conjugating enzyme/RWD-like||RWD domain
OS01G0558500	osa-miR172d-5p	-	PWWP domain
OS01G0558800	novel_4	-	Protein of unknown function DUF3531
OS01G0562600	osa-miR6248,osa-miR437	-	Protein of unknown function DUF247, plant
OS01G0563000	osa-miR1319a,osa-miR6248,osa-miR2905,osa-miR5799	-	Peptidyl-prolyl cis-trans isomerase, FKBP-type||Peptidyl-prolyl cis-trans isomerase, FKBP-type, domain||Tetratricopeptide-like helical
OS01G0564300	osa-miR6248,osa-miR1436	-	Peptidyl-prolyl cis-trans isomerase, FKBP-type, domain||Peptidyl-prolyl cis-trans isomerase, FKBP-type
OS01G0565600	osa-miR6248	-	Protein of unknown function DUF866, eukaryotic
OS01G0565800	osa-miR164e	-	Protein of unknown function DUF538
OS01G0568800	osa-miR1440b	-	Concanavalin A-like lectin/glucanase, subgroup||Serine/threonine- / dual specificity protein kinase, catalytic domain||Serine/threonine-protein kinase, active site||Protein kinase-like domain||Protein kinase, ATP binding site||Protein kinase domain||Gnk2-homologous domain
OS01G0574500	osa-miR156k	FTSH5	Peptidase M41||ATPase, AAA-type, conserved site||P-loop containing nucleoside triphosphate hydrolase||ATPase, AAA-type, core||AAA+ ATPase domain||Peptidase, FtsH
OS01G0575500	osa-miR2121a,osa-miR818a,osa-miR5827	-	G-protein beta WD-40 repeat||WD40 repeat||DENN domain||dDENN domain||WD40/YVTN repeat-like-containing domain||WD40-repeat-containing domain||uDENN domain||WD40 repeat, conserved site
OS01G0580100	osa-miR172b	-	GPI mannosyltransferase
OS01G0586800	osa-miR1436	-	DNA-binding WRKY
OS01G0587300	novel_3	-	Phosphoribosyltransferase C-terminal||C2 domain
OS01G0587400	osa-miR6248,osa-miR5801,novel_3	-	Apple-like||Protein kinase domain||Concanavalin A-like lectin/glucanase, subgroup||S-receptor-like serine/threonine-protein kinase||Serine/threonine- / dual specificity protein kinase, catalytic domain||Serine/threonine-protein kinase, active site||Protein kinase-like domain||S-locus glycoprotein||Bulb-type lectin domain||Protein kinase, ATP binding site
OS01G0588600	osa-miR166i-5p	-	CWC16 protein
OS01G0588700	osa-miR1436	-	CWC16 protein
OS01G0591000	osa-miR1848	-	Aldehyde dehydrogenase, N-terminal||Aldehyde dehydrogenase, C-terminal||Aldehyde/histidinol dehydrogenase||Aldehyde dehydrogenase, conserved site||Aldehyde dehydrogenase domain||Aldehyde dehydrogenase, glutamic acid active site
OS01G0592900	osa-miR1320-5p,osa-miR1862f,osa-miR1431	-	Helicase-like, DEXD box c2 type||P-loop containing nucleoside triphosphate hydrolase||Helicase, superfamily 1/2, ATP-binding domain, DinG/Rad3-type||DEAD2||ATP-dependent helicase, C-terminal||DNA helicase (DNA repair), Rad3 type||Helicase, superfamily 1/2, ATP-binding domain
OS01G0595600	osa-miR1846a-5p	-	Alpha/Beta hydrolase fold||Alpha/beta hydrolase fold-1
OS01G0596700	osa-miR2118l	-	FBD domain
OS01G0600200	osa-miR5147	-	Protein phosphatase 2A, regulatory subunit PR55||Protein phosphatase 2A, regulatory subunit PR55, conserved site||WD40 repeat, conserved site||WD40/YVTN repeat-like-containing domain||WD40 repeat||WD40-repeat-containing domain
OS01G0600400	osa-miR399a	-	Tetratricopeptide-like helical||Pentatricopeptide repeat
OS01G0601000	osa-miR1436	-	Mg2+ transporter protein, CorA-like/Zinc transport protein ZntB
OS01G0602500	osa-miR437	-	Cytochrome P450, E-class, group I||Cytochrome P450
OS01G0603100	osa-miR1436	-	P-loop containing nucleoside triphosphate hydrolase
OS01G0605650	osa-miR1436	-	Zinc finger, C3HC-like
OS01G0607300	osa-miR1436,osa-miR1862f,osa-miR1862a,osa-miR1862d,osa-miR1439	-	Ubiquitin-related domain||Rad60/SUMO-like domain
OS01G0607400	osa-miR7694-3p	-	WD40/YVTN repeat-like-containing domain||WD40 repeat||WD40-repeat-containing domain||WD40 repeat, conserved site||LisH dimerisation motif
OS01G0607900	osa-miR166i-5p,novel_3	-	Leucine-rich repeat||Protein kinase-like domain||Leucine-rich repeat-containing N-terminal, type 2||Protein kinase domain
OS01G0609000	osa-miR2121a	PDR1	ABC-transporter extracellular N-terminal domain||ABC transporter-like||P-loop containing nucleoside triphosphate hydrolase||Plant PDR ABC transporter associated||ABC-2 type transporter||AAA+ ATPase domain
OS01G0610600	osa-miR815a	-	Endonuclease/exonuclease/phosphatase
OS01G0613900	osa-miR5825	-	LPPG:FO 2-phospho-L-lactate transferase CofD/UPF0052
OS01G0614300	osa-miR812o-3p,osa-miR1436,osa-miR1439,osa-miR812o-5p	-	Protein trichome birefringence-like 36-43||Trichome birefringence-like family||PMR5 N-terminal domain
OS01G0615300	osa-miR1436,osa-miR1439	-	Chloramphenicol acetyltransferase-like domain
OS01G0617600	osa-miR1439,osa-miR1436	-	Plant organelle RNA recognition domain
OS01G0618300	osa-miR2096-5p	-	Armadillo-type fold||Armadillo-like helical
OS01G0619800	osa-miR7694-3p,osa-miR1436	-	Glycoside hydrolase, superfamily
OS01G0621200	osa-miR812a,osa-miR812o-5p,osa-miR6248,osa-miR812o-3p	-	Amino acid transporter, transmembrane
OS01G0621300	osa-miR5819	-	Protein of unknown function DUF3133
OS01G0623600	osa-miR5801,osa-miR5808	-	Parallel beta-helix repeat||Glycoside hydrolase, family 28||Pectin lyase fold/virulence factor||Pectin lyase fold
OS01G0624000	osa-miR1426,osa-miR5827	-	Neutral/alkaline non-lysosomal ceramidase, N-terminal||Neutral/alkaline non-lysosomal ceramidase, C-terminal||Neutral/alkaline nonlysosomal ceramidase
OS01G0625900	osa-miR1848	-	Ovate protein family, C-terminal
OS01G0628700	osa-miR818a	-	Cytochrome P450, conserved site||Cytochrome P450, E-class, group I||Cytochrome P450
OS01G0633100	osa-miR393b-3p	-	ADP-glucose pyrophosphorylase, conserved site||Nucleotide-diphospho-sugar transferases||Nucleotidyl transferase||Trimeric LpxA-like
OS01G0634500	osa-miR397b,osa-miR397a	LAC2	Multicopper oxidase, type 3||Multicopper oxidase, copper-binding site||Multicopper oxidase, type 2||-||Multicopper oxidase, type 1
OS01G0636600	osa-miR1861g	-	Formylmethionine deformylase||Peptide deformylase
OS01G0636700	osa-miR444f,osa-miR444b.2	-	P-loop containing nucleoside triphosphate hydrolase||SNF2-related||Nucleotide-binding, alpha-beta plait||RNA recognition motif domain||Helicase, superfamily 1/2, ATP-binding domain
OS01G0637600	osa-miR1861g	PDF1B	Formylmethionine deformylase||Peptide deformylase
OS01G0638600	osa-miR6249a	-	UDP-glucuronosyl/UDP-glucosyltransferase
OS01G0639600	osa-miR6249a	-	Protein of unknown function DUF1645, plant
OS01G0640000	osa-miR1437a	-	Carbonic anhydrase, prokaryotic-like, conserved site||Carbonic anhydrase
OS01G0640200	osa-miR1846d-3p	-	von Willebrand factor, type A||Uncharacterised protein family UPF0497, trans-membrane plant
OS01G0640600	osa-miR6248	-	Exostosin-like
OS01G0642000	osa-miR2905	IMCEL2	Alpha/Beta hydrolase fold||Carboxylesterase, type B
OS01G0642700	osa-miR1436,osa-miR1439	-	S-locus glycoprotein||S-locus glycoprotein, mannose-binding-type||Bulb-type lectin domain||Apple-like
OS01G0643300	osa-miR1436	PIN3A	Auxin efflux carrier||Auxin efflux carrier, plant type
OS01G0648700	osa-miR6248,osa-miR818a,osa-miR3981-5p	-	NET domain
OS01G0649000	osa-miR5819,osa-miR408-5p,osa-miR6249a	-	Small-subunit processome, Utp12||WD40-repeat-containing domain||WD40 repeat||WD40/YVTN repeat-like-containing domain
OS01G0649100	osa-miR1862a,osa-miR1442,osa-miR1862d	-	Malate dehydrogenase, type 1||L-lactate/malate dehydrogenase||Lactate dehydrogenase/glycoside hydrolase, family 4, C-terminal||Malate dehydrogenase, active site||Lactate/malate dehydrogenase, C-terminal||NAD(P)-binding domain||Lactate/malate dehydrogenase, N-terminal
OS01G0650200	novel_3,osa-miR7692-3p	-	SGNH hydrolase-type esterase domain
OS01G0651800	osa-miR6248,osa-miR812k,osa-miR812f,osa-miR812p,osa-miR812g	-	Lipase, class 3||Alpha/Beta hydrolase fold
OS01G0652100	osa-miR812f	-	PMR5 N-terminal domain||Protein trichome birefringence-like 36-43||Trichome birefringence-like family
OS01G0654100	osa-miR393a	-	Glutamine amidotransferase||CTP synthase||Class I glutamine amidotransferase-like||CTP synthase, N-terminal||P-loop containing nucleoside triphosphate hydrolase
OS01G0654500	osa-miR5152-3p	-	Isocitrate dehydrogenase NADP-dependent||Isopropylmalate dehydrogenase-like domain||Isocitrate/isopropylmalate dehydrogenase, conserved site
OS01G0658900	osa-miR5340	-	Basic-leucine zipper domain||G-box binding, MFMR||AP-1 transcription factor
OS01G0663800	osa-miR1879	-	Protein of unknown function DUF1296, plant
OS01G0664100	osa-miR7694-5p,osa-miR1436	-	Mg2+ transporter protein, CorA-like/Zinc transport protein ZntB
OS01G0665300	osa-miR2870	-	Dullard phosphatase domain, eukaryotic||NLI interacting factor||HAD-like domain
OS01G0665400	osa-miR1436	-	Carbohydrate/puine kinase, PfkB, conserved site||Carbohydrate kinase PfkB
OS01G0666800	osa-miR3981-3p	-	Vacuolar protein sorting-associated protein 16||Vps16, C-terminal||WD40/YVTN repeat-like-containing domain||Vps16, N-terminal
OS01G0667400	osa-miR812a	WOX7	-
OS01G0670800	osa-miR167e-3p	ARF2	B3 DNA binding domain||DNA-binding pseudobarrel domain||Auxin response factor
OS01G0674800	osa-miR2097-3p	-	Serine-threonine/tyrosine-protein kinase catalytic domain||Protein kinase domain||Protein kinase-like domain
OS01G0675800	osa-miR820a	-	NAC domain
OS01G0678500	osa-miR5536	TPC1	Two pore calcium channel protein 1||Ion transport domain||EF-hand domain||Voltage-dependent channel, four helix bundle domain||EF-hand domain pair
OS01G0679000	osa-miR1436	-	RNA polymerase III Rpc82, C -terminal||RNA polymerase III subunit RPC82-related, helix-turn-helix||Winged helix-turn-helix DNA-binding domain
OS01G0680900	osa-miR5825	-	Cytochrome b561/ferric reductase transmembrane||Cytochrome b561, eukaryote||DOMON domain
OS01G0681400	osa-miR1436	-	Beclin family
OS01G0683100	osa-miR812s,osa-miR812a,osa-miR2863b,osa-miR812o-3p,osa-miR1436	-	ATPase, AAA-type, core||AAA+ ATPase domain||ATPase, AAA-type, conserved site||Katanin p60 subunit A1||Vps4 oligomerisation, C-terminal||P-loop containing nucleoside triphosphate hydrolase
OS01G0685100	osa-miR1879	-	Reverse transcriptase zinc-binding domain
OS01G0685400	novel_3	-	Myb domain||SANT/Myb domain
OS01G0685500	osa-miR3979-5p	-	DNA ligase, ATP-dependent, central||DNA ligase, ATP-dependent, conserved site
OS01G0687700	osa-miR1439	-	Domain of unknown function DUF292, eukaryotic
OS01G0689451	osa-miR5825,osa-miR437	-	Zinc finger, CTCHY-type||Haemerythrin/HHE cation-binding motif||Zinc finger, RING-type||Zinc finger, RING/FYVE/PHD-type||Zinc finger, CHY-type||Rubredoxin-type fold
OS01G0690800	osa-miR1436,osa-miR5076,osa-miR1425-5p,osa-miR437,osa-miR5808	-	Protein kinase, ATP binding site||Wall-associated receptor kinase galacturonan-binding domain||Protein kinase domain||Serine-threonine/tyrosine-protein kinase catalytic domain||Concanavalin A-like lectin/glucanase, subgroup||Serine/threonine- / dual specificity protein kinase, catalytic domain||Protein kinase-like domain||Serine/threonine-protein kinase, active site
OS01G0694900	osa-miR1436	-	AP180 N-terminal homology (ANTH) domain||Epsin-like, N-terminal||Clathrin adaptor, phosphoinositide-binding, GAT-like||ENTH/VHS
OS01G0695700	osa-miR1436	-	AAA+ ATPase domain||P-loop containing nucleoside triphosphate hydrolase||ABC transporter type 1, transmembrane domain||ABC transporter, conserved site||ABC transporter-like
OS01G0702400	osa-miR827	-	ARP2/3 complex, 41kDa subunit (p41-arc)||WD40-repeat-containing domain||Transcription factor IIIC, 90kDa subunit, N-terminal||WD40/YVTN repeat-like-containing domain||WD40 repeat
OS01G0706700	osa-miR529b	-	Anoctamin/TMEM 16
OS01G0706900	osa-miR6248	ILL2	Peptidase M20||-||Peptidase M20, dimerisation domain
OS01G0708100	osa-miR2098-5p	-	Myristoyl-CoA:protein N-myristoyltransferase, C-terminal||Myristoyl-CoA:protein N-myristoyltransferase, conserved site||Acyl-CoA N-acyltransferase||Myristoyl-CoA:protein N-myristoyltransferase, N-terminal||Myristoyl-CoA:protein N-myristoyltransferase
OS01G0708300	osa-miR5500,osa-miR437,osa-miR1436,osa-miR5825	-	Magnesium transporter NIPA
OS01G0710200	osa-miR1848	-	Amine oxidase
OS01G0710700	osa-miR5788	-	Alpha/Beta hydrolase fold||Lipase, class 3
OS01G0714800	osa-miR1436	-	DNA-binding WRKY
OS01G0716200	osa-miR437	-	Domain of unknown function DUF4005||IQ motif, EF-hand binding site
OS01G0723500	osa-miR1439,osa-miR5799,osa-miR1441	-	DNA-binding pseudobarrel domain||B3 DNA binding domain
OS01G0723600	osa-miR1436	-	Ribose-phosphate pyrophosphokinase, N-terminal domain||Phosphoribosyltransferase domain||Phosphoribosyltransferase-like||Ribose-phosphate diphosphokinase
OS01G0723700	osa-miR5825,osa-miR5831,osa-miR437	-	DNA-binding pseudobarrel domain||B3 DNA binding domain
OS01G0724500	osa-miR437	-	Plant PDR ABC transporter associated||ABC-2 type transporter
OS01G0725400	osa-miR2871a-3p	-	Uncharacterised protein family UPF0497, trans-membrane plant||Uncharacterised protein family UPF0497, trans-membrane plant subgroup
OS01G0725600	osa-miR5831	-	Regulator of chromosome condensation, RCC1||Regulator of chromosome condensation 1/beta-lactamase-inhibitor protein II
OS01G0725800	osa-miR396a-5p	-	WD40 repeat||WD40/YVTN repeat-like-containing domain||WD40-repeat-containing domain||WD40 repeat, conserved site||Protein kinase-like domain||Protein kinase domain
OS01G0726400	osa-miR160e-3p	MADS32	Transcription factor, MADS-box||Transcription factor, K-box
OS01G0728300	osa-miR6248	-	Cytochrome P450, E-class, group I||Cytochrome P450
OS01G0729100	osa-miR818f	-	Protein of unknown function DUF92, TMEM19
OS01G0730200	novel_3	-	F-box domain
OS01G0733500	osa-miR1861d	BURP3	BURP domain
OS01G0738100	osa-miR1439	-	Peptidase C48, SUMO/Sentrin/Ubl1
OS01G0738500	osa-miR167d-3p	-	Aminotransferase-like, plant mobile domain||Phospholipase C, phosphatidylinositol-specific, Y domain
OS01G0739400	osa-miR5161	-	Endoribonuclease YbeY||Metalloprotease catalytic domain, predicted||Cof protein||HAD-like domain
OS01G0739700	osa-miR3979-3p	-	Glycoside hydrolase, family 17||Glycoside hydrolase, catalytic domain||Glycoside hydrolase, superfamily
OS01G0742500	osa-miR2275c	HXK6	-||Hexokinase, conserved site||Hexokinase, N-terminal||Hexokinase, C-terminal
OS01G0743100	novel_4	-	P-loop containing nucleoside triphosphate hydrolase||IQ motif, EF-hand binding site
OS01G0743300	osa-miR2871a-3p	-	Protease-associated domain, PA||Peptidase M28||Transferrin receptor-like, dimerisation domain
OS01G0743600	osa-miR6248	-	PUA-like domain||Peptidase S16, lon N-terminal
OS01G0745700	osa-miR2098-5p	-	Zinc finger, NHR/GATA-type||Zinc finger, GATA-type||Transcription factor, GATA, plant
OS01G0747300	novel_3	-	Protein of unknown function DUF506, plant
OS01G0747500	osa-miR5152-5p	PYRC	Amidohydrolase 1||Dihydroorotase, conserved site||Dihydroorotase homodimeric type
OS01G0748300	osa-miR1857-3p	-	Senescence regulator S40
OS01G0748950	osa-miR818a	-	Major facilitator superfamily domain||Proton-dependent oligopeptide transporter family
OS01G0750500	osa-miR812a,osa-miR1439,osa-miR1436,osa-miR156b-3p	-	Domain of unknown function DUF814
OS01G0752500	novel_3	-	DNA-binding domain||AP2/ERF domain
OS01G0755500	novel_3	PCF7	Transcription factor TCP subgroup||Transcription factor, TCP
OS01G0757500	osa-miR812s,osa-miR812a,osa-miR1439	-	Siah interacting protein, N-terminal||HSP20-like chaperone||CS domain
OS01G0757800	osa-miR1436,osa-miR818a	-	DNA-repair protein, UmuC-like||DNA polymerase, Y-family, little finger domain
OS01G0758300	osa-miR1426	-	Phosphoenolpyruvate carboxylase||Phosphoenolpyruvate carboxylase, bacterial/plant-type||Pyruvate/Phosphoenolpyruvate kinase-like domain||Phosphoenolpyruvate carboxylase, active site
OS01G0758400	osa-miR169f.1,osa-miR169n	-	Phosphatidate cytidylyltransferase, eukaryota||Phosphatidate cytidylyltransferase
OS01G0759200	osa-miR6249a	CIPK30	Protein kinase domain||Calcium/calmodulin-dependent/calcium-dependent protein kinase||Serine/threonine- / dual specificity protein kinase, catalytic domain||Protein kinase-like domain||Serine/threonine-protein kinase, active site||NAF domain||NAF/FISL domain||Protein kinase, ATP binding site
OS01G0759900	osa-miR169r-5p	-	MetI-like domain||Nucleobase-ascorbate transporter 1/2||Xanthine/uracil/vitamin C permease
OS01G0761300	osa-miR5147,osa-miR2275a	-	AMP-dependent synthetase/ligase||AMP-binding enzyme C-terminal domain
OS01G0762400	osa-miR1436	-	Mitochondrial import inner membrane translocase subunit Tim50||HAD-like domain||NLI interacting factor
OS01G0763100	osa-miR6248	-	Peptidase S54, rhomboid domain||Peptidase S54, rhomboid
OS01G0763200	osa-miR5833	-	Transcription factor TCP subgroup||Transcription factor, TCP
OS01G0763600	osa-miR5337b	-	Glycerophosphoryl diester phosphodiesterase||Glycerophosphodiester phosphodiesterase domain||PLC-like phosphodiesterase, TIM beta/alpha-barrel domain
OS01G0763700	osa-miR2098-5p	-	Protein of unknown function DUF3571
OS01G0764800	novel_3	GH3.2	GH3 auxin-responsive promoter
OS01G0765000	osa-miR818a,osa-miR1436	-	APOBEC/CMP deaminase, zinc-binding||CMP/dCMP deaminase, zinc-binding||Cytidine deaminase||Cytidine deaminase-like
OS01G0765300	osa-miR396g	-	RNA recognition motif domain||Nucleotide-binding, alpha-beta plait||SPOC like C-terminal domain||Spen paralogue and orthologue SPOC, C-terminal
OS01G0765600	novel_3	-	EF-Hand 1, calcium-binding site||EF-hand domain pair||EF-hand domain
OS01G0765900	osa-miR3979-5p	SAP3	Zinc finger, A20-type||Zinc finger, AN1-type
OS01G0767100	osa-miR1436	-	Peptidase S28||Alpha/Beta hydrolase fold
OS01G0767900	novel_3	-	Ankyrin repeat||Domain of unknown function DUF3420||BTB/POZ fold||NPR1/NIM1-like, C-terminal||Ankyrin repeat-containing domain
OS01G0769200	osa-miR1439	-	Proteinase inhibitor I9||Peptidase S8, subtilisin-related||Peptidase S8, subtilisin, Asp-active site||Peptidase S8, subtilisin, Ser-active site||Peptidase S8/S53 domain
OS01G0770100	novel_3	-	Chloramphenicol acetyltransferase-like domain||O-acyltransferase, WSD1, C-terminal||O-acyltransferase, WSD1, N-terminal
OS01G0770500	osa-miR5788,osa-miR1439	-	AAA+ ATPase domain||ABC transporter-like||P-loop containing nucleoside triphosphate hydrolase||ABC transporter, conserved site
OS01G0771400	osa-miR1429-5p	-	Ubiquitin carboxyl-terminal hydrolase-like domain||Ubiquitin carboxyl-terminal hydrolases family 2||Peptidase C19, ubiquitin carboxyl-terminal hydrolase 2, conserved site||Ubiquitin carboxyl-terminal hydrolase, C-terminal||ICP0-binding domain of Ubiquitin-specific protease 7
OS01G0772000	osa-miR5526	DRB1	Double-stranded RNA-binding protein||Double-stranded RNA-binding domain
OS01G0772700	osa-miR1436,osa-miR437,osa-miR5831,osa-miR1439,osa-miR2905	-	Armadillo-type fold||Monensin-resistant homologue 2
OS01G0773600	osa-miR5513	-	Glycoside hydrolase, family 47
OS01G0777700	osa-miR1436,osa-miR818a	-	Histidine phosphatase superfamily, clade-2||Histidine phosphatase superfamily
OS01G0779300	osa-miR3981-3p	-	Legume lectin domain||Protein kinase, ATP binding site||Concanavalin A-like lectin/glucanase, subgroup||Protein kinase-like domain||Serine/threonine- / dual specificity protein kinase, catalytic domain||Serine/threonine-protein kinase, active site||Protein kinase domain||Legume lectin, beta chain, Mn/Ca-binding site
OS01G0779400	osa-miR1439	-	Helicase, C-terminal||Zinc finger, C3HC4 RING-type||P-loop containing nucleoside triphosphate hydrolase||SNF2-related||Zinc finger, RING-type||Zinc finger, RING/FYVE/PHD-type||Helicase, superfamily 1/2, ATP-binding domain||Zinc finger, RING-type, conserved site
OS01G0780500	osa-miR5788	SCAMP2	-
OS01G0780800	osa-miR5794	-	SAND domain||Developmental regulator, ULTRAPETALA
OS01G0782200	osa-miR5788,osa-miR1439	-	Diacylglycerol kinase, catalytic domain||ATP-NAD kinase-like domain
OS01G0782500	osa-miR5788	-	Phospholipid/glycerol acyltransferase
OS01G0783200	osa-miR6248	-	Diacylglycerol kinase, accessory domain||ATP-NAD kinase-like domain||Diacylglycerol kinase, catalytic domain||Diacylglycerol kinase, plant
OS01G0784700	osa-miR818a,osa-miR1436,osa-miR812n-3p,osa-miR812f,osa-miR812s,osa-miR812n-5p,osa-miR812g,osa-miR812k,osa-miR812a,osa-miR812p	-	Protein kinase domain||Apple-like||Serine-threonine/tyrosine-protein kinase catalytic domain||S-receptor-like serine/threonine-protein kinase||Concanavalin A-like lectin/glucanase, subgroup||S-locus glycoprotein||Serine/threonine- / dual specificity protein kinase, catalytic domain||Serine/threonine-protein kinase, active site||Protein kinase-like domain||Epidermal growth factor-like domain||Bulb…
OS01G0785700	osa-miR818a,osa-miR1439	-	Tetratricopeptide-like helical||Pentatricopeptide repeat
OS01G0787600	osa-miR1850.1	-	Alpha/beta hydrolase fold-1||Alpha/Beta hydrolase fold
OS01G0788400	osa-miR5816	-	Pectin lyase fold||Pectin lyase fold/virulence factor||Pectinesterase, active site||Pectinesterase inhibitor domain||Pectinesterase, catalytic
OS01G0794400	osa-miR2867-3p	-	Thioredoxin-like fold
OS01G0794800	osa-miR171i-5p	-	Peptidase S8, subtilisin-related||Proteinase inhibitor I9||Peptidase S8, subtilisin, Ser-active site||Peptidase S8/S53 domain
OS01G0795000	osa-miR171i-5p,osa-miR5536	-	Peptidase S8, subtilisin, Ser-active site||Peptidase S8/S53 domain||Peptidase S8, subtilisin-related||Proteinase inhibitor I9
OS01G0795100	osa-miR1436	-	Peptidase S8, subtilisin-related||Proteinase inhibitor I9||Peptidase S8/S53 domain||Protease-associated domain, PA||Peptidase S8, subtilisin, Ser-active site
OS01G0800400	osa-miR6249a	-	Pentatricopeptide repeat
OS01G0805200	osa-miR529b	-	Protein of unknown function DUF3007
OS01G0805900	osa-miR1429-3p	TUBB4	Beta tubulin||Tubulin/FtsZ, 2-layer sandwich domain||Beta tubulin, autoregulation binding site||Tubulin/FtsZ, C-terminal||-||Tubulin, C-terminal||Tubulin/FtsZ, GTPase domain||Tubulin, conserved site
OS01G0810500	osa-miR5831	-	Protein kinase, ATP binding site||Leucine-rich repeat||Concanavalin A-like lectin/glucanase, subgroup||Protein kinase-like domain||Serine/threonine- / dual specificity protein kinase, catalytic domain||Serine/threonine-protein kinase, active site||Protein kinase domain||Malectin-like carbohydrate-binding domain||Serine-threonine/tyrosine-protein kinase catalytic domain
OS01G0810600	osa-miR1436	-	Protein kinase, ATP binding site||Malectin-like carbohydrate-binding domain||Serine-threonine/tyrosine-protein kinase catalytic domain||Protein kinase domain||Serine/threonine- / dual specificity protein kinase, catalytic domain||Protein kinase-like domain||Serine/threonine-protein kinase, active site||Concanavalin A-like lectin/glucanase, subgroup
OS01G0810800	osa-miR1436	-	Leucine-rich repeat||Protein kinase, ATP binding site||Serine/threonine- / dual specificity protein kinase, catalytic domain||Serine/threonine-protein kinase, active site||Protein kinase-like domain||Concanavalin A-like lectin/glucanase, subgroup||Serine-threonine/tyrosine-protein kinase catalytic domain||Malectin-like carbohydrate-binding domain||Protein kinase domain
OS01G0811400	osa-miR5161,osa-miR5337b,osa-miR5825	-	Exostosin-like
OS01G0812000	osa-miR159d,osa-miR159a.1,osa-miR319a-3p.2-3p,osa-miR159f,osa-miR159c,osa-miR159e	GAM1	Transcription factor, GAMYB||-||SANT/Myb domain||Myb domain
OS01G0813700	osa-miR2121a,osa-miR2867-3p	BGLU2	Glycoside hydrolase, catalytic domain||Glycoside hydrolase, superfamily||Glycoside hydrolase, family 1
OS01G0814100	osa-miR5794	-	Bifunctional inhibitor/plant lipid transfer protein/seed storage helical domain
OS01G0814300	osa-miR5794	-	Tetratricopeptide-like helical||Pentatricopeptide repeat
OS01G0816400	osa-miR1436	MOR1	CLASP N-terminal domain||HEAT, type 2||Armadillo-type fold||Armadillo-like helical
OS01G0817000	osa-miR1439	-	Coiled-coil domain containing protein 109, C-terminal
OS01G0818600	osa-miR437	-	Protein kinase, ATP binding site||Serine/threonine- / dual specificity protein kinase, catalytic domain||Serine/threonine-protein kinase, active site||Protein kinase-like domain||Concanavalin A-like lectin/glucanase, subgroup||Serine-threonine/tyrosine-protein kinase catalytic domain||Protein kinase domain
OS01G0819200	osa-miR5831,osa-miR437	-	C2 domain
OS01G0819400	osa-miR815a	-	Ubiquitin-conjugating enzyme, active site||Ubiquitin-conjugating enzyme/RWD-like||Ubiquitin-conjugating enzyme, E2
OS01G0821800	osa-miR1436	-	Glutathione S-transferase, C-terminal-like||Glutathione S-transferase, C-terminal||tRNA-binding domain||Nucleic acid-binding, OB-fold
OS01G0821900	osa-miR1848	-	Protein kinase, ATP binding site||Protein kinase-like domain||Leucine-rich repeat||Leucine-rich repeat, typical subtype||Serine-threonine/tyrosine-protein kinase catalytic domain||Protein kinase domain
OS01G0823200	osa-miR1320-5p	-	Triose-phosphate transporter domain
OS01G0824600	osa-miR818a	CIPK11	Protein kinase domain||Calcium/calmodulin-dependent/calcium-dependent protein kinase||Protein kinase-like domain||Serine/threonine- / dual specificity protein kinase, catalytic domain||Serine/threonine-protein kinase, active site||NAF domain||NAF/FISL domain||Protein kinase, ATP binding site||KA1 domain/Ssp2 C-terminal domain
OS01G0825700	novel_3	-	VHS subgroup||ENTH/VHS
OS01G0825800	osa-miR395o,osa-miR395c	-	Amino acid transporter, transmembrane
OS01G0826900	osa-miR437	-	Domain of unknown function DUF399||Protein of unknown function DUF3411, plant
OS01G0827600	osa-miR1425-5p,osa-miR437	-	Exocyst complex protein Exo70||Cullin repeat-like-containing domain
OS01G0828200	osa-miR3981-5p	-	Gamma interferon inducible lysosomal thiol reductase GILT
OS01G0829900	osa-miR166k-5p	YSL18	Oligopeptide transporter, OPT superfamily
OS01G0830200	osa-miR5811	-	Zinc finger, C3HC4 RING-type||Zinc finger, RING-type||Zinc finger, RING/FYVE/PHD-type||Zinc finger, RING-type, conserved site
OS01G0830700	osa-miR818a,osa-miR1436,osa-miR812g,osa-miR812p	-	Trichome birefringence-like family||PMR5 N-terminal domain
OS01G0832600	osa-miR6248	-	Oxoglutarate/iron-dependent dioxygenase||Isopenicillin N synthase||Isopenicillin N synthase-like||Non-haem dioxygenase N-terminal domain
OS01G0835000	osa-miR1436	-	Rab-GTPase-TBC domain
OS01G0836400	osa-miR6248	-	SAC3/GANP/Nin1/mts3/eIF-3 p25
OS01G0837100	osa-miR2098-5p	-	Pectin lyase fold||Pectin lyase fold/virulence factor||Pectate lyase/Amb allergen
OS01G0842400	osa-miR397a	LAC4	-||Multicopper oxidase, type 1||Multicopper oxidase, type 2||Multicopper oxidase, copper-binding site||Multicopper oxidase, type 3
OS01G0842500	osa-miR397a,osa-miR397b	-	Multicopper oxidase, copper-binding site||Multicopper oxidase, type 3||Multicopper oxidase, type 1||Multicopper oxidase, type 2
OS01G0843300	osa-miR827	-	Small GTPase superfamily, Rho type||EF hand associated, type-2||Small GTPase superfamily, Rab type||EF hand associated, type-1||Small GTPase superfamily||P-loop containing nucleoside triphosphate hydrolase
OS01G0843800	osa-miR528-5p	-	Multicopper oxidase, type 1||Multicopper oxidase, type 3
OS01G0844400	osa-miR1436	-	Zinc finger, DHHC-type, palmitoyltransferase
OS01G0844800	osa-miR1848	-	Nucleic acid binding NABP||Armadillo-type fold||Pumilio RNA-binding repeat||Armadillo-like helical
OS01G0844900	osa-miR164a,osa-miR5819,osa-miR5161,osa-miR164c	-	SANT/Myb domain||Myb domain, plants||Myb domain
OS01G0846600	osa-miR1439	-	S-adenosyl-L-methionine-dependent methyltransferase-like||Putative S-adenosyl-L-methionine-dependent methyltransferase
OS01G0847600	osa-miR1436,osa-miR818a	-	NADP-dependent oxidoreductase domain||Aldo/keto reductase subgroup||Aldo/keto reductase, conserved site||Aldo/keto reductase
OS01G0848200	osa-miR1426,osa-miR1436	-	Glutamate 5-kinase/delta-1-pyrroline-5-carboxylate synthase||Gamma-glutamyl phosphate reductase GPR||Aldehyde/histidinol dehydrogenase||Glutamate 5-kinase, conserved site||Aldehyde dehydrogenase, C-terminal||Delta l-pyrroline-5-carboxylate synthetase||Aspartate/glutamate/uridylate kinase||Aldehyde dehydrogenase domain||Glutamate/acetylglutamate kinase||Gamma-glutamyl phosphate reductase GPR, cons…
OS01G0849100	osa-miR437,osa-miR1439	-	PRONE domain
OS01G0850550	osa-miR1436,osa-miR397b	LAC6	Multicopper oxidase, type 3||Multicopper oxidase, copper-binding site||Multicopper oxidase, type 2||Multicopper oxidase, type 1||-
OS01G0850700	osa-miR397b	LAC7	Multicopper oxidase, type 3||Multicopper oxidase, copper-binding site||Multicopper oxidase, type 2||Multicopper oxidase, type 1||-
OS01G0850800	osa-miR397a,osa-miR397b	LAC8	Multicopper oxidase, copper-binding site||Multicopper oxidase, type 3||Multicopper oxidase, type 1||-||Multicopper oxidase, type 2
OS01G0851000	osa-miR1848	-	Carbohydrate kinase PfkB
OS01G0851100	novel_3	-	GDP-fucose protein O-fucosyltransferase
OS01G0852200	osa-miR167a-5p	PHT4;3	Major facilitator superfamily domain||Major facilitator superfamily
OS01G0856900	osa-miR1861e	-	Carbohydrate-binding-like fold||Immunoglobulin-like fold||Glycoside hydrolase, family 13||Carbohydrate binding module family 20
OS01G0857400	osa-miR1436,novel_3,osa-miR812g,osa-miR7694-3p,osa-miR1439	-	Amino acid transporter, transmembrane
OS01G0857500	osa-miR535-3p	-	Nucleobase-ascorbate transporter 11/12||Xanthine/uracil/vitamin C permease
OS01G0860400	osa-miR1439,osa-miR1436	-	Glycoside hydrolase, superfamily||Glycoside hydrolase, family 18, catalytic domain||Glycoside hydrolase, catalytic domain||Glycoside hydrolase, chitinase active site
OS01G0867200	osa-miR818a	-	WD40-repeat-containing domain||WD40/YVTN repeat-like-containing domain
OS01G0867300	osa-miR166g-5p	-	Basic-leucine zipper domain
OS01G0868200	osa-miR1440a	-	Zinc finger, DHHC-type, palmitoyltransferase
OS01G0868600	novel_3	-	Aspartic peptidase domain||Aspartic peptidase
OS01G0868900	osa-miR6249a	-	Peptidase S8, subtilisin-related||Proteinase inhibitor I9||Peptidase S8, subtilisin, Ser-active site||Peptidase S8/S53 domain
OS01G0869200	novel_3	MRS2-E	-
OS01G0870100	osa-miR169p	-	CASTOR/POLLUX/SYM8 ion channels||NAD(P)-binding domain||Regulator of K+ conductance, C-terminal
OS01G0870201	osa-miR1857-3p	-	GPI transamidase subunit PIG-U
OS01G0871100	osa-miR2121a	-	Alpha/Beta hydrolase fold||Alpha/beta hydrolase fold-1
OS01G0871200	osa-miR2055	-	Zinc finger, C2H2-like||Zinc finger, C2H2||Zinc finger C2H2-type/integrase DNA-binding domain
OS01G0872000	osa-miR437	-	Major facilitator superfamily domain||Proton-dependent oligopeptide transporter family
OS01G0872700	osa-miR156k	-	Zinc finger, CCHC-type||5'-3' exoribonuclease||5'-3' exoribonuclease 2||Putative 5-3 exonuclease
OS01G0873700	osa-miR818f	-	Magnesium transporter NIPA
OS01G0875300	osa-miR1436,osa-miR812v,osa-miR812k,osa-miR812f,osa-miR812p,osa-miR812g	-	Rossmann-like alpha/beta/alpha sandwich fold
OS01G0875400	osa-miR815a	-	Ubiquitin-related domain||NLI interacting factor||HAD-superfamily hydrolase, subfamily IIID||HAD-like domain||Ubiquitin domain
OS01G0876100	osa-miR408-3p	-	Chloride channel ClC-plant||Chloride channel, voltage gated||CBS domain||Chloride channel, core
OS01G0877300	osa-miR399a,osa-miR399d,osa-miR399j	-	Spindle assembly checkpoint component Mad1
OS01G0878800	osa-miR1436	-	Extradiol ring-cleavage dioxygenase, class III enzyme, subunit B||Extradiol aromatic ring-opening dioxygenase, DODA type
OS01G0880200	osa-miR529b	-	Glycosyl transferase, family 8||UDP-glucuronate:xylan alpha-glucuronosyltransferase||Nucleotide-diphospho-sugar transferases
OS01G0883000	novel_3	-	Protein kinase domain||Serine-threonine/tyrosine-protein kinase catalytic domain||Concanavalin A-like lectin/glucanase, subgroup||Serine/threonine- / dual specificity protein kinase, catalytic domain||Serine/threonine-protein kinase, active site||Protein kinase-like domain||Protein kinase, ATP binding site
OS01G0884800	osa-miR1846a-5p	-	Pentatricopeptide repeat||Tetratricopeptide-like helical
OS01G0885000	osa-miR1436,osa-miR1428e-5p	-	Cytochrome c, class IA/ IB||Cytochrome c-like domain
OS01G0886600	osa-miR5808	-	Clp protease, ATP-binding subunit ClpX||P-loop containing nucleoside triphosphate hydrolase||ATPase, AAA-type, core||AAA+ ATPase domain||Clp ATPase, C-terminal
OS01G0886900	osa-miR1436,osa-miR818a	-	Vitamin B6 photo-protection and homoeostasis
OS01G0887700	osa-miR2055	-	Zinc finger, PHD-type||Zinc finger, PHD-finger||Zinc finger, FYVE/PHD-type||Zinc finger, RING/FYVE/PHD-type||Zinc finger, PHD-type, conserved site
OS01G0888500	osa-miR2876-3p	-	AIR synthase-related protein, C-terminal domain||Phosphoribosylformylglycinamidine synthase||Class I glutamine amidotransferase-like||Glutamine amidotransferase||PurM, N-terminal-like
OS01G0889400	osa-miR1846a-3p	LBD6	Lateral organ boundaries, LOB
OS01G0889900	osa-miR1436	-	Apple-like||Protein kinase domain||Protein kinase-like domain||Serine/threonine- / dual specificity protein kinase, catalytic domain||Serine/threonine-protein kinase, active site||S-locus glycoprotein||Concanavalin A-like lectin/glucanase, subgroup||S-receptor-like serine/threonine-protein kinase||Bulb-type lectin domain||Protein kinase, ATP binding site
OS01G0891000	osa-miR1436	-	Beta-hexosaminidase subunit alpha/beta||Glycoside hydrolase, catalytic domain||Glycoside hydrolase, superfamily||Beta-hexosaminidase, eukaryotic type, N-terminal||Chitobiase/beta-hexosaminidase domain 2-like||Glycoside hydrolase family 20, catalytic core
OS01G0891700	osa-miR5542	-	Leucine-rich repeat-containing N-terminal, type 2||Leucine-rich repeat
OS01G0892600	osa-miR5161	-	Alpha/Beta hydrolase fold||Protein notum homologue
OS01G0893400	osa-miR3979-3p	-	Zinc finger, TAZ-type||BTB/POZ fold
OS01G0893700	osa-miR817	-	DOMON domain
OS01G0894050	osa-miR171f-5p	-	Myb/SANT-like domain
OS01G0896500	osa-miR1439	-	Rhodanese-like domain
OS01G0897500	osa-miR1436	-	Tetratricopeptide-like helical||Pentatricopeptide repeat
OS01G0898300	osa-miR5157a-3p	-	Armadillo-type fold
OS01G0899800	osa-miR444b.2	-	AP2/ERF domain||DNA-binding domain||AP2-like ethylene-responsive transcription factor
OS01G0900700	osa-miR1848	-	Alpha/Beta hydrolase fold||Lipase, class 3
OS01G0900800	osa-miR6248	-	Myc-type, basic helix-loop-helix (bHLH) domain
OS01G0902800	osa-miR5150-3p	-	Proton-dependent oligopeptide transporter family||Major facilitator superfamily domain
OS01G0906600	osa-miR5512a	-	Tetratricopeptide repeat||Tetratricopeptide TPR2||Tetratricopeptide repeat-containing domain||Tetratricopeptide-like helical
OS01G0907400	osa-miR2864.2	JMJ705	JmjC domain||Zinc finger, C2H2-like||Transcription factor jumonji, JmjN||Zinc finger C2H2-type/integrase DNA-binding domain||Zinc finger, C2H2
OS01G0909200	osa-miR2870	DCL3A	Helicase/UvrB domain||Argonaute/Dicer protein, PAZ domain||Ribonuclease III domain||Helicase, C-terminal||Dicer dimerisation domain||Helicase, superfamily 1/2, ATP-binding domain||P-loop containing nucleoside triphosphate hydrolase
OS01G0911200	osa-miR6249a	RPN2	Dolichyl-diphosphooligosaccharide--protein glycosyltransferase subunit Swp1||Terpenoid cyclases/protein prenyltransferase alpha-alpha toroid
OS01G0913300	osa-miR2121a	-	Major facilitator superfamily domain||Proton-dependent oligopeptide transporter family
OS01G0915000	osa-miR6249a	-	Protein of unknown function DUF506, plant
OS01G0916800	osa-miR1436	-	THO complex, subunitTHOC2, C-terminal||THO complex, subunitTHOC2, N-terminal
OS01G0919100	osa-miR5801	-	Multi antimicrobial extrusion protein
OS01G0919600	osa-miR1439	-	Protein of unknown function DUF707
OS01G0919800	osa-miR1436	PIN6	Auxin efflux carrier, plant type||Auxin efflux carrier
OS01G0920700	osa-miR5819	-	Nucleotide-diphospho-sugar transferase
OS01G0922600	osa-miR156l-5p,osa-miR529b,osa-miR156a,osa-miR156k	-	Transcription factor, SBP-box
OS01G0923900	osa-miR394	-	Galactose oxidase/kelch, beta-propeller||Kelch-type beta propeller||F-box domain
OS01G0924966	novel_3	-	Auxin-induced protein, ARG7
OS01G0925300	osa-miR1846e,novel_3	-	Zinc finger, DHHC-type, palmitoyltransferase
OS01G0925800	osa-miR417	-	Ubiquitin-associated/translation elongation factor EF1B, N-terminal, eukaryote||Ubiquitin-conjugating enzyme, E2||Ubiquitin-conjugating enzyme/RWD-like||Ubiquitin-conjugating enzyme, active site
OS01G0926400	osa-miR5833	-	Exostosin-like
OS01G0926800	osa-miR2871a-3p,osa-miR5536	-	CRAL/TRIO, N-terminal domain||CRAL-TRIO domain
OS01G0927000	osa-miR1436,osa-miR444b.1,osa-miR1439	-	PUA-like domain||SRA-YDG||Post-SET domain||SET domain||Histone H3-K9 methyltransferase, plant||Pre-SET zinc-binding sub-group||Pre-SET domain
OS01G0927500	osa-miR5150-3p	-	Protein kinase-like domain||Protein kinase domain
OS01G0928000	novel_3	-	Myc-type, basic helix-loop-helix (bHLH) domain
OS01G0928700	osa-miR5825	-	Aminotransferase, class I/classII||Pyridoxal phosphate-dependent transferase, major region, subdomain 1||Pyridoxal phosphate-dependent transferase||Aminotransferase, class-II, pyridoxal-phosphate binding site||Pyridoxal phosphate-dependent transferase, major region, subdomain 2
OS01G0930800	osa-miR1439	BGLU5	Glycoside hydrolase, family 1, active site||Glycoside hydrolase, family 1||Glycoside hydrolase, catalytic domain||Glycoside hydrolase, superfamily
OS01G0932500	osa-miR1423-5p	HAK6	K+ potassium transporter
OS01G0932700	novel_3	-	Knottin, scorpion toxin-like
OS01G0932950	osa-miR5819	-	Rapid ALkalinization Factor||Twin-arginine translocation pathway, signal sequence
OS01G0934800	osa-miR2865	PIR7B	Alpha/beta hydrolase fold-1||Alpha/Beta hydrolase fold
OS01G0935000	osa-miR1436,osa-miR2864.2,osa-miR818a	-	Zinc finger, C2H2-like||Zinc finger, C2H2||C2H2 zinc finger protein, plant||Zinc finger C2H2-type/integrase DNA-binding domain
OS01G0936100	osa-miR2870	-	Protein kinase-like domain||Serine/threonine-protein kinase, active site||Protein kinase, ATP binding site||Concanavalin A-like lectin/glucanase, subgroup||Protein kinase domain
OS01G0939000	osa-miR1439	-	Phosphatidylinositol N-acetylglucosaminyltransferase subunit Y
OS01G0939100	osa-miR437,novel_3,osa-miR5825	-	Cation-transporting P-type ATPase||P-type ATPase, phosphorylation site||Calcium-transporting P-type ATPase, N-terminal autoinhibitory domain||P-type ATPase, transmembrane domain||Cation-transporting P-type ATPase, N-terminal||Calcium-transporting P-type ATPase, subfamily IIB||Cation-transporting P-type ATPase, C-terminal||HAD-like domain||P-type ATPase, cytoplasmic domain N||P-type ATPase, A doma…
OS01G0939700	osa-miR6248,osa-miR812n-3p,osa-miR812n-5p,osa-miR812k	-	Putative esterase||S-formylglutathione hydrolase||Alpha/Beta hydrolase fold
OS01G0940100	osa-miR812k,osa-miR1439,osa-miR812n-5p,osa-miR812p,osa-miR1436,osa-miR812n-3p	HXK3	Hexokinase, N-terminal||Hexokinase, C-terminal||Hexokinase, conserved site||-
OS01G0942900	osa-miR1436,osa-miR437,osa-miR814a	-	Ankyrin repeat||Ankyrin repeat-containing domain
OS01G0943800	osa-miR814a,osa-miR437,osa-miR1436	-	Ankyrin repeat||Ankyrin repeat-containing domain
OS01G0944200	osa-miR5076	-	Ribonuclease H-like domain
OS01G0944700	osa-miR1436,osa-miR1439,osa-miR812a	-	Glycoside hydrolase, catalytic domain||Glycoside hydrolase, family 17||Glycoside hydrolase, superfamily
OS01G0946850	osa-miR5152-5p	-	F-box domain
OS01G0948500	osa-miR3979-3p	-	Armadillo-like helical||Armadillo-type fold
OS01G0949800	osa-miR1441	-	Thioredoxin-like fold||Glutathione S-transferase, C-terminal-like||Glutathione S-transferase, N-terminal
OS01G0951400	osa-miR1442	UMPS2	Orotidine 5'-phosphate decarboxylase domain||Phosphoribosyltransferase-like||Orotate phosphoribosyltransferase||Phosphoribosyltransferase domain||Ribulose-phosphate binding barrel||Orotidine 5'-phosphate decarboxylase, active site||Orotidine 5'-phosphate decarboxylase||Aldolase-type TIM barrel
OS01G0952100	osa-miR812n-3p,osa-miR812p	-	Germin, manganese binding site||RmlC-like cupin domain||RmlC-like jelly roll fold||Cupin 1
OS01G0952500	osa-miR1436	-	CheY-like superfamily||Signal transduction response regulator, receiver domain
OS01G0952800	osa-miR5161,osa-miR6248,osa-miR818a,osa-miR437	-	Achaete-scute transcription factor-related||Myc-type, basic helix-loop-helix (bHLH) domain
OS01G0953500	osa-miR156k,osa-miR156l-5p	-	C2 domain
OS01G0954400	novel_4	-	Zinc finger, RING/FYVE/PHD-type||Zinc finger, RING-type||Zinc finger, RING-type, conserved site
OS01G0955700	osa-miR1436	-	Chloroquine resistance transporter-related
OS01G0956600	osa-miR1442,osa-miR1439,osa-miR7694-3p,osa-miR1436	-	Protein kinase-like domain||Nucleotide-binding, alpha-beta plait||RNA recognition motif domain
OS01G0957000	osa-miR408-5p	-	ATP-NAD kinase-like domain||ATP-NAD kinase, PpnK-type, all-beta||Inorganic polyphosphate/ATP-NAD kinase, domain 1||Inorganic polyphosphate/ATP-NAD kinase, predicted
OS01G0957600	osa-miR1439	-	Cytochrome P450||Cytochrome P450, E-class, group I
OS01G0958500	osa-miR1436,osa-miR812v,osa-miR812a,osa-miR529b	-	Nucleotide-binding, alpha-beta plait||RNA recognition motif domain
OS01G0958900	osa-miR1436,osa-miR1439	-	DNA mismatch repair protein Mlh1||Histidine kinase-like ATPase, ATP-binding domain||DNA mismatch repair, conserved site||Ribosomal protein S5 domain 2-type fold, subgroup||Ribosomal protein S5 domain 2-type fold||DNA mismatch repair protein, C-terminal||DNA mismatch repair protein family
OS01G0960400	osa-miR5788	-	Protein kinase, ATP binding site||Leucine-rich repeat-containing N-terminal, type 2||Leucine-rich repeat||Leucine-rich repeat, typical subtype||Protein kinase domain||Serine/threonine- / dual specificity protein kinase, catalytic domain||Protein kinase-like domain||Serine/threonine-protein kinase, active site||Concanavalin A-like lectin/glucanase, subgroup
OS01G0962700	osa-miR1436	-	Twin-arginine translocation pathway, signal sequence||Plant peroxidase||Peroxidase, active site||Haem peroxidase||Peroxidases heam-ligand binding site||Haem peroxidase, plant/fungal/bacterial
OS01G0963600	osa-miR6248	-	ABA/WDS induced protein
OS01G0965400	osa-miR2098-5p	-	Uridylate kinase||Uridylate kinase, bacteria||Aspartate/glutamate/uridylate kinase
OS01G0965500	osa-miR5537	-	Zinc finger, RING/FYVE/PHD-type||SET domain||Zinc finger, FYVE/PHD-type||Zinc finger, PHD-finger||Zinc finger, PHD-type
OS01G0969100	osa-miR1854-5p	-	NAD(P)-binding domain||NAD-dependent epimerase/dehydratase
OS01G0976450	osa-miR5161	-	SET domain
OS01G0977200	osa-miR2870	-	Tetratricopeptide TPR2||Tetratricopeptide repeat-containing domain||Tetratricopeptide repeat||DnaJ domain, conserved site||DnaJ domain||Tetratricopeptide-like helical
OS02G0101000	osa-miR393b-3p	-	Amino acid transporter, transmembrane
OS02G0101100	osa-miR1436	-	Translation initiation factor 3, C-terminal||Translation initiation factor 3, N-terminal||Translation initiation factor 3
OS02G0101600	osa-miR812k,osa-miR812n-5p,osa-miR1439,osa-miR1436,osa-miR812n-3p	-	SKP1 component, POZ domain||BTB/POZ fold||SKP1 component
OS02G0102800	osa-miR6248	-	Pleckstrin homology-like domain||START domain||Pleckstrin homology domain||START-like domain||Domain of unknown function DUF1336
OS02G0104100	osa-miR1439,osa-miR1862e,osa-miR1862f,osa-miR1436	-	Transcription factor, K-box||Transcription factor, MADS-box
OS02G0105100	osa-miR1846e	-	Sec16, central conserved domain||COPII coat assembly protein, Sec16
OS02G0106100	osa-miR159f,osa-miR159e,osa-miR159a.1	-	Glycosyl hydrolase family 32, N-terminal||Glycoside hydrolase, family 32, active site||Concanavalin A-like lectin/glucanase, subgroup||Glycosyl hydrolase, five-bladed beta-propellor domain||Glycosyl hydrolase family 32, C-terminal||Glycoside hydrolase, family 32
OS02G0106800	osa-miR437,osa-miR2121a	-	TMPIT-like
OS02G0109400	osa-miR1862f	-	JmjC domain
OS02G0110600	osa-miR5821	-	Protein kinase domain||Serine-threonine/tyrosine-protein kinase catalytic domain||Concanavalin A-like lectin/glucanase, subgroup||Protein kinase, ATP binding site||Serine/threonine- / dual specificity protein kinase, catalytic domain||Protein kinase-like domain||Serine/threonine-protein kinase, active site
OS02G0111900	osa-miR5827	-	DEAD/DEAH-box helicase, putative||Helicase, C-terminal||Helicase, superfamily 1/2, ATP-binding domain||P-loop containing nucleoside triphosphate hydrolase||DNA/RNA helicase, DEAD/DEAH box type, N-terminal
OS02G0112900	osa-miR812s,osa-miR812a,osa-miR3981-3p	GABA-T	Pyridoxal phosphate-dependent transferase, major region, subdomain 1||Pyridoxal phosphate-dependent transferase||Aminotransferase class-III||Pyridoxal phosphate-dependent transferase, major region, subdomain 2
OS02G0116000	osa-miR5825	-	Zinc finger, C2H2-like||Zinc finger, C2H2||Zinc finger C2H2-type/integrase DNA-binding domain
OS02G0117200	osa-miR6248,osa-miR818a	-	Domain of unknown function DUF3456
OS02G0120100	osa-miR1436	-	Serine/threonine-protein kinase, active site||Serine/threonine- / dual specificity protein kinase, catalytic domain||Protein kinase-like domain||ACT domain||Serine-threonine/tyrosine-protein kinase catalytic domain||Protein kinase domain
OS02G0120200	osa-miR818f,osa-miR1436	-	Phospholipase D family||C2 domain
OS02G0120500	osa-miR6249a	-	Myc-type, basic helix-loop-helix (bHLH) domain
OS02G0121000	osa-miR1439,osa-miR1436	-	Glutamate-tRNA ligase, bacterial/mitochondrial||Aminoacyl-tRNA synthetase, class I, anticodon-binding domain, subdomain 2||Glutamyl/glutaminyl-tRNA synthetase||Rossmann-like alpha/beta/alpha sandwich fold||Glutamyl/glutaminyl-tRNA synthetase, class Ib, catalytic domain||Glutamyl/glutaminyl-tRNA synthetase, class Ib, alpha-bundle domain||Aminoacyl-tRNA synthetase, class I, conserved site||Aminoacy…
OS02G0121100	novel_3	-	Zinc finger, CCHC-type||Cold shock protein||Cold-shock protein, DNA-binding||Nucleic acid-binding, OB-fold||Cold-shock conserved site
OS02G0123200	osa-miR1437b-5p	-	Peroxisome membrane protein, Pex16
OS02G0125700	osa-miR1846a-5p	-	Chlorophyll a/b binding protein domain
OS02G0126400	osa-miR1436	-	Protein kinase, ATP binding site||EF-hand domain||EF-hand domain pair||Serine/threonine- / dual specificity protein kinase, catalytic domain||Protein kinase-like domain||Serine/threonine-protein kinase, active site||EF-Hand 1, calcium-binding site||Protein kinase domain
OS02G0129000	osa-miR2864.2	-	Probable transposase, Ptta/En/Spm, plant
OS02G0129600	osa-miR3979-3p	-	Glycoside hydrolase, family 14||Glycoside hydrolase, catalytic domain||BZR1, transcriptional repressor||Glycoside hydrolase, superfamily
OS02G0130200	osa-miR1439,osa-miR1436	-	Pectin lyase fold||Pectin lyase fold/virulence factor||Glycoside hydrolase, family 28||Parallel beta-helix repeat
OS02G0131400	osa-miR1436	-	Glycoside hydrolase, superfamily||Glycoside hydrolase, family 3, N-terminal||Glycoside hydrolase family 3 C-terminal domain||Glycoside hydrolase family 3
OS02G0132600	osa-miR437	-	Pentatricopeptide repeat
OS02G0133800	osa-miR1846e	PAF1	Proteasome, subunit alpha/beta||Proteasome, alpha-subunit, N-terminal domain||Nucleophile aminohydrolases, N-terminal||Proteasome A-type subunit
OS02G0134000	osa-miR1439	-	Rossmann-like alpha/beta/alpha sandwich fold
OS02G0135200	osa-miR1846d-3p	-	Mitogen-activated protein (MAP) kinase, conserved site||Protein kinase-like domain||Serine/threonine- / dual specificity protein kinase, catalytic domain||Protein kinase, ATP binding site||Protein kinase domain
OS02G0135300	osa-miR1436	WEE1	Protein kinase domain||Serine/threonine- / dual specificity protein kinase, catalytic domain||Protein kinase-like domain||Serine/threonine-protein kinase, active site||Protein kinase, ATP binding site
OS02G0137000	osa-miR2879	-	WD40-repeat-containing domain||WD40/YVTN repeat-like-containing domain
OS02G0137100	osa-miR156l-5p,osa-miR156k	-	Conserved hypothetical protein CHP01589, plant
OS02G0139400	osa-miR156l-5p,osa-miR156a,osa-miR156k	SPL3	Transcription factor, SBP-box
OS02G0139500	osa-miR5340	-	Terpenoid cyclases/protein prenyltransferase alpha-alpha toroid||Squalene cyclase
OS02G0140200	osa-miR818a,osa-miR1436	-	Terpenoid cyclases/protein prenyltransferase alpha-alpha toroid||Squalene cyclase||Terpene synthase, conserved site
OS02G0143100	osa-miR1436	SPP2	Sucrose-6-phosphate phosphohydrolase C-terminal||Sucrose-phosphate phosphatase||HAD-superfamily hydrolase, subfamily IIB||Sucrose-phosphate synthase||HAD-like domain||Sucrose phosphatase, plant/cyanobacteria
OS02G0151300	osa-miR2098-5p	-	Glycoside hydrolase, family 9||Six-hairpin glycosidase-like||Six-hairpin glycosidase
OS02G0152200	osa-miR1436	-	Protein of unknown function DUF1677, Oryza sativa
OS02G0153000	osa-miR160f-3p	-	Domain of unknown function DUF547
OS02G0153100	osa-miR435	-	Leucine-rich repeat||Protein kinase, ATP binding site||Leucine-rich repeat-containing N-terminal, type 2||Protein kinase domain||Leucine-rich repeat, typical subtype||Concanavalin A-like lectin/glucanase, subgroup||Serine/threonine-protein kinase, active site||Serine/threonine- / dual specificity protein kinase, catalytic domain||Protein kinase-like domain
OS02G0155900	novel_3	-	Leucine-rich repeat
OS02G0156400	osa-miR435	-	Leucine-rich repeat-containing N-terminal, type 2||Leucine-rich repeat||Leucine-rich repeat, typical subtype
OS02G0157600	osa-miR1436,osa-miR1439	-	Rhodanese-like domain
OS02G0158900	osa-miR1848	-	CBS domain
OS02G0161500	osa-miR156l-5p,osa-miR156a	-	Leucine-rich repeat, typical subtype||Leucine-rich repeat
OS02G0162200	osa-miR5819	-	Plastocyanin-like
OS02G0164600	osa-miR395a	-	Pentatricopeptide repeat
OS02G0165000	osa-miR818a,osa-miR1436,osa-miR1442	-	Zinc finger, RING-CH-type||Zinc finger, RING/FYVE/PHD-type
OS02G0169800	osa-miR818a	-	Armadillo-like helical||Armadillo-type fold
OS02G0174100	osa-miR156l-5p,osa-miR156k,osa-miR156a,osa-miR529b	SPL4	Transcription factor, SBP-box
OS02G0174400	osa-miR5831	-	Protein kinase-like domain||Protein kinase domain
OS02G0175100	osa-miR3981-3p	-	Basic-leucine zipper domain
OS02G0175700	osa-miR1436,osa-miR818a	-	AP180 N-terminal homology (ANTH) domain||Epsin-like, N-terminal||ENTH/VHS||Clathrin adaptor, phosphoinositide-binding, GAT-like
OS02G0175900	osa-miR1436	-	Proline-rich protein PRCC
OS02G0176000	osa-miR1848	-	Zinc finger, B-box
OS02G0176100	osa-miR812v,osa-miR812p,osa-miR812k,osa-miR812n-3p,osa-miR6248,osa-miR812g,osa-miR812f,osa-miR812n-5p	-	Protein kinase domain||Serine-threonine/tyrosine-protein kinase catalytic domain||Protein kinase-like domain
OS02G0177300	osa-miR3981-3p,osa-miR5490,osa-miR1436,osa-miR6248	SPL5	Transcription factor, SBP-box
OS02G0177700	osa-miR1439	-	Uncharacterised protein family UPF0497, trans-membrane plant||Uncharacterised protein family UPF0497, trans-membrane plant subgroup
OS02G0177800	osa-miR818a	-	Calmodulin binding protein-like
OS02G0178700	osa-miR3979-3p	-	Myc-type, basic helix-loop-helix (bHLH) domain
OS02G0178800	osa-miR812a,osa-miR812o-3p	-	NAD(P)-binding domain||Uncharacterised domain Wax2, C-terminal||Fatty acid hydroxylase
OS02G0179100	osa-miR1439,osa-miR1436	-	HD/PDEase domain||HD domain
OS02G0179300	osa-miR1862d,osa-miR5788	-	UV excision repair protein Rad23||Ubiquitin domain||Ubiquitin-associated/translation elongation factor EF1B, N-terminal, eukaryote||XPC-binding domain||Heat shock chaperonin-binding||Ubiquitin-related domain
OS02G0179400	novel_3	-	Tubby C-terminal-like domain||Tubby, C-terminal
OS02G0181800	osa-miR2096-5p,osa-miR172d-5p,osa-miR3979-5p	-	Ubiquitin fusion degradation protein UFD1
OS02G0184000	osa-miR2873b	-	Zinc finger, DHHC-type, palmitoyltransferase||Ankyrin repeat-containing domain||Ankyrin repeat
OS02G0187500	osa-miR1862f	-	Uncharacterised protein family UPF0047
OS02G0189100	osa-miR5831,osa-miR437	-	Mediator complex, subunit Med11
OS02G0189300	osa-miR437	-	Lipase, GDSL||SGNH hydrolase-type esterase domain
OS02G0190500	osa-miR1436,osa-miR5816	-	Leucine-rich repeat-containing N-terminal, type 2||Leucine-rich repeat||Protein kinase-like domain||Leucine-rich repeat, typical subtype||Serine-threonine/tyrosine-protein kinase catalytic domain||Protein kinase domain
OS02G0191600	osa-miR172b	-	Basic-leucine zipper domain
OS02G0193300	osa-miR1439	-	Protein of unknown function DUF4228, plant
OS02G0194000	osa-miR820a	-	SANT domain||SANT/Myb domain
OS02G0194700	osa-miR5831	-	Lipoxygenase||Lipoxygenase, C-terminal||Lipoxygenase, domain 3||PLAT/LH2 domain||Lipoxygenase, iron binding site||Lipoxygenase, plant||Lipoxygenase, conserved site
OS02G0194900	osa-miR1436,osa-miR3979-3p,osa-miR1439	-	Basic-leucine zipper domain||Transcription factor TGA like domain
OS02G0196100	novel_3	-	Protein TRANSPARENT TESTA 1 like||Zinc finger, C2H2-like||Zinc finger C2H2-type/integrase DNA-binding domain||Zinc finger, C2H2
OS02G0197200	osa-miR812a,osa-miR5799	-	Mlo-related protein
OS02G0197700	osa-miR1436	-	Decaprenyl diphosphate synthase-like
OS02G0198300	osa-miR1847.1	-	Arf GTPase activating protein||C2 domain
OS02G0198900	osa-miR1860-5p	-	Ribosomal protein L7/L12, C-terminal||Ribosomal protein L7/L12, C-terminal/adaptor protein ClpS-like||Ribosomal protein L7/L12||Putative ribosomal protein L7/L12, plants
OS02G0201300	osa-miR1429-5p	-	Protein phosphatase inhibitor
OS02G0202250	osa-miR818a,osa-miR3981-3p	-	Nucleoporin Nup186/Nup192/Nup205
OS02G0202400	osa-miR2864.2	-	Mitochondrial carrier protein||Mitochondrial substrate/solute carrier||Mitochondrial carrier domain
OS02G0202900	novel_3	-	Galactose oxidase, beta-propeller||F-box domain||Kelch repeat type 1
OS02G0208900	osa-miR1439	-	Arf GTPase activating protein
OS02G0209000	osa-miR437	-	Coatomer, WD associated region||Tetratricopeptide-like helical||WD40 repeat||WD40/YVTN repeat-like-containing domain||WD40-repeat-containing domain
OS02G0209100	osa-miR437	-	Coatomer, WD associated region||Tetratricopeptide-like helical||WD40-repeat-containing domain
OS02G0214500	osa-miR172d-5p	-	NAC domain
OS02G0215200	osa-miR5788,osa-miR814a	-	Histone deacetylase domain||Histone deacetylase superfamily||Histone deacetylase
OS02G0218400	osa-miR5813	-	Concanavalin A-like lectin/glucanase, subgroup||Rossmann-like alpha/beta/alpha sandwich fold||Serine/threonine- / dual specificity protein kinase, catalytic domain||Protein kinase-like domain||Serine/threonine-protein kinase, active site||Protein kinase domain
OS02G0220400	osa-miR5144-3p	-	Zinc finger, GATA-type||Zinc finger, NHR/GATA-type
OS02G0220700	osa-miR167d-3p	-	Serine-threonine/tyrosine-protein kinase catalytic domain||Protein kinase domain||Protein kinase, ATP binding site||Serine/threonine- / dual specificity protein kinase, catalytic domain||Serine/threonine-protein kinase, active site||Protein kinase-like domain
OS02G0223300	osa-miR529a	-	Poly(A) polymerase, central domain||Poly(A) polymerase
OS02G0225000	osa-miR6252	-	Mitochondrial substrate/solute carrier||Mitochondrial carrier domain
OS02G0226000	osa-miR396a-3p	-	Mpv17/PMP22
OS02G0226801	osa-miR1429-3p	-	START-like domain||Polyketide cyclase/dehydrase
OS02G0227200	osa-miR1436,osa-miR2870	-	Early nodulin 93 ENOD93 protein
OS02G0227900	osa-miR5162	-	Leucine-rich repeat
OS02G0229400	osa-miR2863b	-	Major facilitator superfamily domain||Sugar/inositol transporter||General substrate transporter||Sugar transporter, conserved site
OS02G0232500	osa-miR5154	-	Leucine-rich repeat||Concanavalin A-like lectin/glucanase, subgroup
OS02G0234300	osa-miR399i	PUB4	Zinc finger, RING/FYVE/PHD-type||Armadillo-like helical||-||Armadillo-type fold||U box domain
OS02G0235600	osa-miR5810	-	Ribosomal protein L5||Ribosomal protein L5, conserved site||Ribosomal protein L5 domain||Ribosomal protein L5, N-terminal||Ribosomal protein L5, C-terminal
OS02G0237100	osa-miR437	-	Polyamine biosynthesis domain||Spermidine/spermine synthases family||S-adenosyl-L-methionine-dependent methyltransferase-like
OS02G0238500	osa-miR5788	-	Tubby C-terminal-like domain
OS02G0241600	osa-miR6248,osa-miR1436	-	Protein kinase, ATP binding site||Serine/threonine-protein kinase, active site||Serine/threonine- / dual specificity protein kinase, catalytic domain||Protein kinase-like domain||Protein kinase domain||Serine-threonine/tyrosine-protein kinase catalytic domain
OS02G0244000	osa-miR169f.2	-	Herpesvirus UL139, cytomegalovirus
OS02G0244100	osa-miR812f,osa-miR812k,osa-miR812p,osa-miR812g,osa-miR6248,osa-miR812n-3p	-	Zinc finger, RING/FYVE/PHD-type||Zinc finger, RING-type
OS02G0244700	osa-miR5150-5p	-	Pyruvate/Phosphoenolpyruvate kinase-like domain||Phosphoenolpyruvate carboxylase, bacterial/plant-type||Phosphoenolpyruvate carboxylase||Phosphoenolpyruvate carboxylase, active site
OS02G0247000	osa-miR1436	-	Vacuolar protein sorting-associate protein Vta1/Callose synthase, N-terminal domain||Callose synthase
OS02G0247200	osa-miR171i-5p	-	T-complex protein 1, gamma subunit||TCP-1-like chaperonin intermediate domain||Chaperone tailless complex polypeptide 1 (TCP-1)||Chaperonin TCP-1, conserved site||Chaperonin Cpn60/TCP-1||GroEL-like equatorial domain||GroEL-like apical domain
OS02G0252100	osa-miR3981-5p,osa-miR5788	-	Nucleotide-binding, alpha-beta plait||RNA recognition motif domain
OS02G0252400	osa-miR394	-	Zinc finger, Dof-type
OS02G0255300	osa-miR812s,osa-miR812o-5p,osa-miR812g,osa-miR812p	-	START-like domain||Polyketide cyclase/dehydrase
OS02G0255500	osa-miR1439,osa-miR1436	-	START-like domain||Polyketide cyclase/dehydrase
OS02G0261800	osa-miR5816	-	P-loop containing nucleoside triphosphate hydrolase
OS02G0266300	osa-miR7694-5p	-	P-loop containing nucleoside triphosphate hydrolase||Ankyrin repeat-containing domain||Ankyrin repeat||AAA+ ATPase domain||CbxX/CfqX||ATPase, AAA-type, core
OS02G0266800	osa-miR812a	-	Basic-leucine zipper domain
OS02G0269000	osa-miR1436	-	Protein of unknown function DUF502
OS02G0273000	osa-miR818a,osa-miR812n-3p,osa-miR812f,osa-miR812n-5p,osa-miR812g,osa-miR812v,osa-miR1439,osa-miR812p	-	P-loop containing nucleoside triphosphate hydrolase||Phosphoribulokinase/uridine kinase||Uridine kinase||Uridine kinase-like protein, plant||Phosphoribosyltransferase-like
OS02G0274100	osa-miR1442	MFP	Crotonase superfamily||3-hydroxyacyl-CoA dehydrogenase, C-terminal||3-hydroxyacyl-CoA dehydrogenase, conserved site||ClpP/crotonase-like domain||Dehydrogenase, multihelical||NAD(P)-binding domain||6-phosphogluconate dehydrogenase, C-terminal-like||3-hydroxyacyl-CoA dehydrogenase, NAD binding||Enoyl-CoA hydratase/isomerase, conserved site
OS02G0274900	osa-miR444a-3p.1,osa-miR444b.1	-	Sugar/inositol transporter||General substrate transporter||Sugar transporter, conserved site||Major facilitator superfamily domain
OS02G0275200	novel_3	-	Xyloglucan fucosyltransferase
OS02G0281000	osa-miR1428e-3p,osa-miR1428b	-	Protein phosphatase 2C, manganese/magnesium aspartate binding site||Protein phosphatase 2C||RmlC-like jelly roll fold||Protein phosphatase 2C (PP2C)-like domain||Protein kinase-like domain||Serine/threonine- / dual specificity protein kinase, catalytic domain||Cyclic nucleotide-binding-like||Cyclic nucleotide-binding domain||Protein kinase domain
OS02G0282000	osa-miR437	-	P-loop containing nucleoside triphosphate hydrolase
OS02G0286700	osa-miR5145	-	Chlorophyllase, chloroplast
OS02G0286850	osa-miR1436	-	P-loop containing nucleoside triphosphate hydrolase
OS02G0287800	osa-miR164e,osa-miR164d,osa-miR164a	-	F-box domain
OS02G0288700	osa-miR6248	-	AAA+ ATPase domain||ABC transporter-like||ABC transporter, conserved site||ABC transporter type 1, transmembrane domain||P-loop containing nucleoside triphosphate hydrolase
OS02G0290300	osa-miR5155	-	WD40 repeat, conserved site||WD40-repeat-containing domain||Quinonprotein alcohol dehydrogenase-like superfamily||WD40/YVTN repeat-like-containing domain||WD40 repeat
OS02G0290400	osa-miR1436	-	Alpha/beta knot methyltransferases||Ribosomal biogenesis, methyltransferase, EMG1/NEP1
OS02G0290900	osa-miR1846a-5p	-	SGNH hydrolase-type esterase domain||Lipase, GDSL
OS02G0292800	osa-miR5831	-	Protein of unknown function DUF599
OS02G0293800	osa-miR6249a	-	Protein of unknown function DUF2043
OS02G0294000	osa-miR5833	-	Micro-fibrillar-associated protein 1, C-terminal
OS02G0296400	osa-miR1436	-	Armadillo-type fold
OS02G0299200	osa-miR1441	-	IQ motif, EF-hand binding site
OS02G0299600	osa-miR1426	-	Protein of unknown function DUF1242
OS02G0300500	osa-miR5542	-	P-loop containing nucleoside triphosphate hydrolase
OS02G0301000	osa-miR1436	-	Zinc finger, RING-type||Zinc finger, RING/FYVE/PHD-type||Zinc finger, RING-type, conserved site||Zinc finger, CCCH-type
OS02G0301700	osa-miR6248	-	Armadillo-type fold
OS02G0302200	osa-miR5831,osa-miR1862f,osa-miR164a,osa-miR5150-3p	-	Pyridoxal phosphate-dependent transferase, major region, subdomain 2||Pyridoxal phosphate-dependent transferase, major region, subdomain 1||Tyrosine/nicotianamine aminotransferase||Pyridoxal phosphate-dependent transferase||Aminotransferase, class I/classII
OS02G0302700	osa-miR169e,osa-miR169h	-	Aminotransferase, class I/classII||Aminotransferases, class-I, pyridoxal-phosphate-binding site||Pyridoxal phosphate-dependent transferase, major region, subdomain 1||Pyridoxal phosphate-dependent transferase||Tyrosine/nicotianamine aminotransferase||Pyridoxal phosphate-dependent transferase, major region, subdomain 2
OS02G0306100	osa-miR167e-3p	-	Vesicle transport protein, Use1
OS02G0307000	osa-miR5147	-	Guanylate-binding protein, N-terminal||P-loop containing nucleoside triphosphate hydrolase||GB1/RHD3-type guanine nucleotide-binding (G) domain||Guanylate-binding protein, C-terminal
OS02G0307800	osa-miR159f	-	Protein of unknown function DUF3082
OS02G0314300	osa-miR1439,osa-miR5794	CAX1C	Calcium/proton exchanger CAX||Calcium/proton exchanger||Sodium/calcium exchanger membrane region
OS02G0316900	osa-miR818a	-	B-block binding subunit of TFIIIC
OS02G0317400	osa-miR6248	COPZ2	-||AP complex, mu/sigma subunit||Longin-like domain
OS02G0319300	osa-miR1436	-	Glutathione S-transferase, C-terminal-like||Glutathione S-transferase (GST)
OS02G0320000	osa-miR1436	-	RmlC-like jelly roll fold||RmlC-like cupin domain||Cysteamine dioxygenase
OS02G0326000	osa-miR1860-5p	-	Protein of unknown function DUF2232, membrane
OS02G0331400	osa-miR5536	-	WAT1-related protein||Drug/metabolite transporter
OS02G0332200	osa-miR5522	-	GroEL-like equatorial domain||GroEL-like apical domain||TCP-1-like chaperonin intermediate domain||Chaperonin TCP-1, conserved site||Chaperonin Cpn60/TCP-1||Chaperone tailless complex polypeptide 1 (TCP-1)||T-complex protein 1, delta subunit
OS02G0433600	osa-miR812a,osa-miR812s,osa-miR812o-3p,osa-miR1436	-	Myc-type, basic helix-loop-helix (bHLH) domain
OS02G0435000	osa-miR818a,osa-miR1436	-	Translocation protein Sec62
OS02G0436400	osa-miR2121a	DAPB1	Dihydrodipicolinate reductase, plant||NAD(P)-binding domain||Dihydrodipicolinate reductase, bacterial||Dihydrodipicolinate reductase, C-terminal||Dihydrodipicolinate reductase, N-terminal
OS02G0437800	osa-miR6248	-	Sec1-like, domain 2||Sec1-like protein
OS02G0438200	osa-miR1429-5p	CYCT1_2	-||Cyclin, N-terminal||Cyclin C/H/T/L
OS02G0440000	osa-miR2121a,osa-miR6248,osa-miR1436	LYSA	Orn/DAP/Arg decarboxylase 2, N-terminal||Ornithine/DAP/Arg decarboxylase||Orn/DAP/Arg decarboxylase 2, C-terminal||PLP-binding barrel||Orn/DAP/Arg decarboxylase 2, conserved site||Diaminopimelate decarboxylase, LysA||Orn/DAP/Arg decarboxylase 2, pyridoxal-phosphate binding site||Alanine racemase/group IV decarboxylase, C-terminal
OS02G0450000	osa-miR156k	-	Ribonuclease H-like domain
OS02G0452500	osa-miR5830,osa-miR1436,osa-miR1864	-	Sec1-like protein
OS02G0458900	osa-miR2103,osa-miR5788,osa-miR1441	-	SGNH hydrolase-type esterase domain
OS02G0461600	osa-miR390-3p,osa-miR814a,osa-miR5513	-	Domain of unknown function DUF1777
OS02G0462300	osa-miR1436	-	Endonuclease I
OS02G0463500	osa-miR1439,osa-miR1436	-	Peptidase S10, serine carboxypeptidase||Alpha/Beta hydrolase fold
OS02G0467700	osa-miR1436,osa-miR5794	-	Glycosyl transferase, family 28, C-terminal
OS02G0470000	osa-miR1872	-	Pentatricopeptide repeat||Tetratricopeptide-like helical
OS02G0470600	osa-miR5079a,osa-miR1863a,osa-miR396a-3p,osa-miR6248,osa-miR529a	-	Vacuolar protein sorting-associated protein 13A N-terminal domain||Vacuolar protein sorting-associated protein 13
OS02G0472566	osa-miR1439,osa-miR812o-5p,osa-miR812o-3p	-	Cysteine-rich secretory protein, allergen V5/Tpx-1-related||CAP domain||Allergen V5/Tpx-1-related, conserved site
OS02G0472700	osa-miR6248	-	Protein kinase domain||Serine-threonine/tyrosine-protein kinase catalytic domain||Serine/threonine-protein kinase, active site||Serine/threonine- / dual specificity protein kinase, catalytic domain||Protein kinase-like domain||Protein kinase, ATP binding site
OS02G0473000	osa-miR1436	-	Riboflavin-specific deaminase, C-terminal||Riboflavin biosynthesis protein RibD||Bacterial bifunctional deaminase-reductase, C-terminal||Dihydrofolate reductase-like domain||Conserved hypothetical protein CHP02464
OS02G0473200	osa-miR1436	-	Aspartic peptidase||Aspartic peptidase domain
OS02G0474300	osa-miR2121a	-	DNA topoisomerase, type IA, central region, subdomain 3||DNA topoisomerase, type IA, core domain||DNA topoisomerase, type IA
OS02G0477700	osa-miR5825,osa-miR396a-3p	-	Endonuclease/exonuclease/phosphatase
OS02G0480900	osa-miR5788	-	Ataxin 2, SM domain||LsmAD domain||Ataxin-2, C-terminal
OS02G0481900	osa-miR156a,osa-miR156l-5p,osa-miR814a,osa-miR818a,osa-miR1436	-	5'-3' exoribonuclease||Putative 5-3 exonuclease
OS02G0488600	osa-miR1442,osa-miR1436	-	Zinc finger, RING/FYVE/PHD-type||U box domain||Armadillo-type fold||Armadillo-like helical
OS02G0489550	osa-miR437,osa-miR5147	-	Tetratricopeptide-like helical||Tetratricopeptide TPR1||Tetratricopeptide repeat-containing domain||O-GlcNAc transferase, C-terminal||Tetratricopeptide repeat
OS02G0491900	osa-miR5144-5p	-	Ankyrin repeat||Ankyrin repeat-containing domain||Tetratricopeptide-like helical
OS02G0492000	osa-miR2121a	-	Ankyrin repeat||Ankyrin repeat-containing domain
OS02G0492500	osa-miR5337a	-	Domain of unknown function DUF1618
OS02G0493050	osa-miR1436	-	Ankyrin repeat-containing domain||Tetratricopeptide-like helical||Ankyrin repeat||Tetratricopeptide repeat
OS02G0493300	osa-miR1873	-	Tetratricopeptide-like helical||Ankyrin repeat-containing domain||Tetratricopeptide repeat-containing domain||Ankyrin repeat||Tetratricopeptide repeat
OS02G0495400	osa-miR437	-	Armadillo-like helical||Armadillo-type fold
OS02G0497500	osa-miR5835,osa-miR1436	-	Zinc hook, Rad50||DNA repair protein Rad50, eukaryotes||P-loop containing nucleoside triphosphate hydrolase
OS02G0498300	osa-miR3979-3p,osa-miR1436	-	Magnesium transporter NIPA
OS02G0503700	osa-miR439a	-	Cytochrome P450||Cytochrome P450, E-class, group I||Cytochrome P450, conserved site
OS02G0504800	osa-miR529b	-	Ribonucleotide reductase-related||Fatty acid desaturase, type 2||Ferritin-like superfamily
OS02G0505400	osa-miR5833	-	Cullin repeat-like-containing domain||Exocyst complex protein Exo70
OS02G0506500	osa-miR1847.1	-	UBA/THIF-type NAD/FAD binding fold||D-isomer specific 2-hydroxyacid dehydrogenase, NAD-binding domain conserved site 1||NAD(P)-binding domain
OS02G0510000	osa-miR167e-3p	-	DnaJ domain, conserved site||DnaJ domain||Domain of unknown function DUF3444
OS02G0510100	novel_3	-	Like-Sm (LSM) domain||Ribonucleoprotein LSM domain
OS02G0511100	osa-miR439a	-	Glucose/ribitol dehydrogenase||Short-chain dehydrogenase/reductase, conserved site||NAD(P)-binding domain||Short-chain dehydrogenase/reductase SDR
OS02G0511400	osa-miR5816	-	Short-chain dehydrogenase/reductase SDR||Glucose/ribitol dehydrogenase||NAD(P)-binding domain
OS02G0511900	osa-miR1857-5p,osa-miR1436	-	DNA-directed DNA polymerase, family B||DNA polymerase epsilon catalytic subunit||Ribonuclease H-like domain||DNA-directed DNA polymerase, family B, exonuclease domain
OS02G0511901	osa-miR5487,osa-miR6248	-	DNA polymerase epsilon catalytic subunit||DNA polymerase epsilon, catalytic subunit A, C-terminal
OS02G0513000	osa-miR1857-5p	-	Concanavalin A-like lectin/glucanase, subgroup||Protein kinase, ATP binding site||Protein kinase-like domain||Serine/threonine-protein kinase, active site||Protein kinase domain
OS02G0515600	osa-miR818a,osa-miR814a	-	LPS-induced tumor necrosis factor alpha factor
OS02G0516600	osa-miR1440b,osa-miR6248	-	Zinc finger, RING-type||Zinc finger, RING/FYVE/PHD-type||Zinc finger, RING-type, conserved site
OS02G0517564	osa-miR529b,osa-miR156k	-	Phosphoribosyltransferase-like||Ubiquitin-related domain||Ribose-phosphate pyrophosphokinase, N-terminal domain
OS02G0519100	osa-miR812s,osa-miR1439,osa-miR812f,osa-miR812k,osa-miR812p,osa-miR812g,osa-miR812o-5p	HAK20	K+ potassium transporter
OS02G0520750	osa-miR2873b	-	Exostosin-like
OS02G0521500	osa-miR5144-5p	-	Peptidase C65, otubain
OS02G0526000	osa-miR6248,osa-miR1436,osa-miR812a,osa-miR1439	-	Protein of unknown function DUF1624
OS02G0528000	osa-miR1436	-	Zinc finger, RING/FYVE/PHD-type||Zinc finger, RING-type
OS02G0528500	osa-miR5542	-	Nucleic acid-binding, OB-fold
OS02G0528900	osa-miR5539a	-	ABC-transporter extracellular N-terminal domain||ABC transporter-like||P-loop containing nucleoside triphosphate hydrolase
OS02G0529700	osa-miR5536	-	Ribosomal protein L12 family
OS02G0529800	osa-miR444b.2	-	Cytochrome P450, E-class, group I||Cytochrome P450||Cytochrome P450, conserved site
OS02G0532900	osa-miR5825	-	Glycoside hydrolase, family 17||Glycoside hydrolase, catalytic domain||Glycoside hydrolase, superfamily
OS02G0534400	osa-miR5825	CIN1	Glycosyl hydrolase family 32, N-terminal||Concanavalin A-like lectin/glucanase, subgroup||Glycoside hydrolase, family 32, active site||Glycosyl hydrolase family 32, C-terminal||Glycosyl hydrolase, five-bladed beta-propellor domain||Glycoside hydrolase, family 32
OS02G0535700	osa-miR2871a-3p	-	Mitochondrial fission ELM1-like
OS02G0537900	osa-miR6248,osa-miR2121a	-	Pyrophosphate-energised proton pump
OS02G0539100	osa-miR5814,osa-miR2905	-	Glycosyl transferase, family 1
OS02G0539900	osa-miR5144-5p	-	WD40 repeat||WD40/YVTN repeat-like-containing domain||WD40-repeat-containing domain||G-protein beta WD-40 repeat
OS02G0543300	osa-miR1848	-	Translation elongation factor EFG, V domain||P-loop containing nucleoside triphosphate hydrolase||Ribosomal protein S5 domain 2-type fold, subgroup||Ribosomal protein S5 domain 2-type fold||Elongation factor, GTP-binding domain||Translation protein, beta-barrel domain||Elongation factor G, III-V domain||Translation elongation factor EFTu/EF1A, domain 2
OS02G0550600	osa-miR166e-3p,osa-miR166m	CINV1	Six-hairpin glycosidase-like||Glycosyl hydrolase family 100
OS02G0551100	osa-miR812a,osa-miR812s,osa-miR812o-5p,osa-miR5799,osa-miR812o-3p,osa-miR6248	SAPK6	Protein kinase domain||Serine/threonine- / dual specificity protein kinase, catalytic domain||Protein kinase-like domain||Serine/threonine-protein kinase, active site||Protein kinase, ATP binding site
OS02G0552000	osa-miR5819	-	Nonaspanin (TM9SF)||Major facilitator superfamily domain
OS02G0554000	osa-miR5825	-	Post-SET domain||SET domain||Zinc finger, CW-type
OS02G0554100	osa-miR156a	-	Regulator of chromosome condensation 1/beta-lactamase-inhibitor protein II||Regulator of chromosome condensation, RCC1
OS02G0556100	osa-miR818a	-	NAD-dependent epimerase/dehydratase||NAD(P)-binding domain
OS02G0557800	osa-miR5542	-	CheY-like superfamily||Signal transduction response regulator, receiver domain
OS02G0558100	osa-miR393a	-	CBS domain||Chloride channel, core||Chloride channel ClC-plant||Chloride channel, voltage gated
OS02G0561900	osa-miR1436,osa-miR818a,osa-miR1439,osa-miR5537,osa-miR815a	-	Zinc finger, RING-type||Zinc finger, RING/FYVE/PHD-type
OS02G0566400	osa-miR1848	-	Protein of unknown function DUF3537
OS02G0566800	osa-miR3979-3p	-	Glycosyl transferase, family 31||Domain of unknown function DUF4094
OS02G0567100	osa-miR2121a,osa-miR5148a	-	Thioredoxin-like fold||Thioredoxin domain
OS02G0569900	osa-miR1848	-	Cytochrome P450||Cytochrome P450, E-class, group I||Cytochrome P450, conserved site
OS02G0570500	osa-miR812o-3p,osa-miR812o-5p	CYP71Z6	Cytochrome P450||Cytochrome P450, E-class, group I||Cytochrome P450, conserved site
OS02G0571300	osa-miR5161,osa-miR5150-3p	KSL5	Terpene synthase, metal-binding domain||Terpenoid synthase||Terpenoid cyclases/protein prenyltransferase alpha-alpha toroid||Terpene synthase, N-terminal domain
OS02G0573500	osa-miR5816	-	General substrate transporter||Sugar transporter, conserved site||Sugar/inositol transporter||Major facilitator superfamily domain
OS02G0574100	osa-miR394,osa-miR812o-5p	-	Sugar/inositol transporter||General substrate transporter||Sugar transporter, conserved site||Major facilitator superfamily domain
OS02G0574900	osa-miR396c-3p	-	Galactose oxidase, beta-propeller||F-box domain||Kelch repeat type 1
OS02G0575900	osa-miR812o-3p	-	Cullin repeat-like-containing domain||Exocyst complex protein Exo70
OS02G0578366	osa-miR5150-3p	-	Uncharacterised protein family UPF0497, trans-membrane plant||Uncharacterised protein family UPF0497, trans-membrane plant subgroup
OS02G0579000	osa-miR164c,osa-miR164d,osa-miR164a,osa-miR164e	-	NAC domain
OS02G0579600	osa-miR444a-3p.1,osa-miR444b.2,osa-miR444a-3p.2,osa-miR444f,osa-miR444b.1	MADS27	Transcription factor, MADS-box||Transcription factor, K-box
OS02G0580400	osa-miR1436,osa-miR1439	-	Dynein light chain, type 1/2
OS02G0580800	osa-miR6248	-	Zinc finger, RING/FYVE/PHD-type||Zinc finger, RING-type
OS02G0582300	osa-miR1436,osa-miR812s,osa-miR1439,osa-miR812o-5p	-	Tetratricopeptide-like helical||Pentatricopeptide repeat
OS02G0586500	osa-miR2870	-	Ribonucleoprotein LSM domain||Like-Sm (LSM) domain||U6 snRNA-associated Sm-like protein LSm4/Small nuclear ribonucleoprotein Sm D1/D3
OS02G0586900	osa-miR1437b-3p	-	Glycine rich protein
OS02G0589000	osa-miR164a,osa-miR2121a	-	Lecithin:cholesterol/phospholipid:diacylglycerol acyltransferase||Alpha/Beta hydrolase fold
OS02G0592000	osa-miR6248	-	Oxoglutarate/iron-dependent dioxygenase||Isopenicillin N synthase-like||Non-haem dioxygenase N-terminal domain
OS02G0592300	osa-miR5513	-	Histidine kinase-like ATPase, ATP-binding domain||DNA mismatch repair protein Pms1/Pms2||Ribosomal protein S5 domain 2-type fold||DNA mismatch repair, conserved site||Ribosomal protein S5 domain 2-type fold, subgroup||MutL, C-terminal, dimerisation||DNA mismatch repair protein family||DNA mismatch repair protein, C-terminal
OS02G0592600	osa-miR1436,osa-miR6248	-	Phospholipase C, phosphatidylinositol-specific, Y domain||Aminotransferase-like, plant mobile domain
OS02G0593100	osa-miR5485	-	Copper amine oxidase, N3-terminal||Copper amine oxidase||Copper amine oxidase, N-terminal||Copper amine oxidase, C-terminal
OS02G0596000	osa-miR1436,osa-miR818a	-	Rhodanese-like domain
OS02G0596100	osa-miR5513	-	GLE1-like
OS02G0596700	novel_3	-	BTB/POZ fold
OS02G0598200	osa-miR1439,osa-miR1436,osa-miR814a	-	DNA-binding pseudobarrel domain||B3 DNA binding domain
OS02G0599151	osa-miR1436	-	Protein phosphatase 2C, manganese/magnesium aspartate binding site||Protein phosphatase 2C (PP2C)-like domain||Protein phosphatase 2C
OS02G0600400	osa-miR1862f,osa-miR2098-3p	-	Glucose-6-phosphate dehydrogenase||NAD(P)-binding domain||Glucose-6-phosphate dehydrogenase, active site||Glucose-6-phosphate dehydrogenase, C-terminal||Glucose-6-phosphate dehydrogenase, NAD-binding
OS02G0602000	osa-miR1848	-	Remorin, C-terminal
OS02G0602600	osa-miR5833	-	RNA recognition motif domain||Nucleotide-binding, alpha-beta plait
OS02G0604000	osa-miR156k	-	Lipase, GDSL||SGNH hydrolase-type esterase domain
OS02G0605400	osa-miR1439,osa-miR1436	-	C2 domain
OS02G0607700	osa-miR5542,osa-miR812a	-	Short-chain dehydrogenase/reductase SDR||Glucose/ribitol dehydrogenase||NAD(P)-binding domain||Short-chain dehydrogenase/reductase, conserved site
OS02G0608100	osa-miR156k	-	MULE transposase domain||FHY3/FAR1 family||FAR1 DNA binding domain||Zinc finger, PMZ-type||Zinc finger, SWIM-type
OS02G0608500	osa-miR2872	-	Protein kinase domain||Ankyrin repeat-containing domain||Serine-threonine/tyrosine-protein kinase catalytic domain||Ankyrin repeat||Protein kinase-like domain
OS02G0609200	osa-miR156k	-	Protein of unknown function DUF1138
OS02G0611300	osa-miR5490	-	Zinc finger, FYVE/PHD-type||Zinc finger, PHD-type||Zinc finger, RING/FYVE/PHD-type||Zinc finger, PHD-type, conserved site
OS02G0612000	osa-miR5147	-	GrpE nucleotide exchange factor||GrpE nucleotide exchange factor, coiled-coil||GrpE nucleotide exchange factor, head
OS02G0613100	osa-miR1427	-	Exostosin-like
OS02G0613200	osa-miR2871a-3p	-	Leucine-rich repeat||Leucine-rich repeat, cysteine-containing subtype
OS02G0613600	osa-miR2864.2	-	Longin-like domain
OS02G0614500	osa-miR2098-5p	-	Bi-functional UDP-rhamnose/UDP-galactose transporter||Triose-phosphate transporter domain
OS02G0614966	osa-miR399i,osa-miR399j	-	Leucine-rich repeat-containing N-terminal, type 2||Leucine-rich repeat
OS02G0617300	osa-miR156a,osa-miR1429-3p	-	Armadillo-type fold||HEAT, type 2||Armadillo-like helical||CLASP N-terminal domain
OS02G0617500	osa-miR1436,osa-miR437	-	Helicase, superfamily 1/2, ATP-binding domain||DNA/RNA helicase, DEAD/DEAH box type, N-terminal||P-loop containing nucleoside triphosphate hydrolase||Sec63 domain||Helicase, C-terminal
OS02G0621500	osa-miR818a	-	Zinc finger, ZZ-type||Zinc finger, RING-type, conserved site||Zinc finger, RING-type||Zinc finger, RING/FYVE/PHD-type||Zinc finger, C3HC4 RING-type
OS02G0621800	osa-miR1320-5p	-	Alcohol dehydrogenase, long-chain fatty||Glucose-methanol-choline oxidoreductase, N-terminal||Glucose-methanol-choline oxidoreductase, C-terminal
OS02G0623500	osa-miR1436	-	Aminoacyl-tRNA synthetase, class II (D/K/N)-like||Lysine-tRNA ligase, class II||Nucleic acid-binding, OB-fold||Lysyl-tRNA synthetase, class II, C-terminal||Aminoacyl-tRNA synthetase, class II||OB-fold nucleic acid binding domain, AA-tRNA synthetase-type||Aminoacyl-tRNA synthetase, class II (D/K/N)
OS02G0625000	osa-miR390-3p	-	DNA photolyase, FAD-binding/Cryptochrome, C-terminal||Cryptochrome, plant||Rossmann-like alpha/beta/alpha sandwich fold||Cryptochrome/DNA photolyase, class 1||DNA photolyase, N-terminal||Cryptochrome/DNA photolyase, class 1 conserved site, C-terminal
OS02G0628600	osa-miR160a-5p,osa-miR160f-5p,osa-miR160e-5p	ARF8	Auxin response factor||DNA-binding pseudobarrel domain||B3 DNA binding domain||Phox/Bem1p
OS02G0631200	osa-miR1439,osa-miR812a,osa-miR1436	-	Protein of unknown function DUF3755
OS02G0632500	osa-miR2121a	-	Ankyrin repeat||Pleckstrin homology-like domain||Pleckstrin homology domain||Arfaptin homology (AH) domain/BAR domain||Arf GTPase activating protein||Ankyrin repeat-containing domain||BAR domain
OS02G0633000	osa-miR437,osa-miR1436,osa-miR395o	-	Alpha/Beta hydrolase fold||Lipase, class 3
OS02G0633100	osa-miR1436	-	B-block binding subunit of TFIIIC||Winged helix-turn-helix DNA-binding domain
OS02G0634700	osa-miR815a,osa-miR6248	-	Peptidase S10, serine carboxypeptidase||Peptidase S10, serine carboxypeptidase, active site||Alpha/Beta hydrolase fold
OS02G0637800	osa-miR5522	-	Protein of unknown function DUF639
OS02G0638400	osa-miR815a	-	BRO1 domain
OS02G0638900	osa-miR1439	-	G-protein beta WD-40 repeat||WD40 repeat, conserved site||WD40-repeat-containing domain||WD40/YVTN repeat-like-containing domain||WD40 repeat
OS02G0639500	osa-miR2121a	EXPB16	Expansin/pollen allergen, DPBB domain||RlpA-like double-psi beta-barrel domain||Expansin, cellulose-binding-like domain||Major pollen allergen Lol pI||Expansin/Lol pI
OS02G0639900	osa-miR1436,osa-miR1862e	-	Thioredoxin, conserved site||Thioredoxin domain||Thioredoxin-like fold
OS02G0640800	osa-miR5542	-	Short-chain dehydrogenase/reductase SDR||Glucose/ribitol dehydrogenase||NAD(P)-binding domain
OS02G0642700	osa-miR1879,osa-miR5825	-	Lipopolysaccharide-modifying protein
OS02G0643600	osa-miR5808,osa-miR5801	-	NAC domain
OS02G0643900	osa-miR5799,osa-miR812a,osa-miR812s,osa-miR812o-3p	-	Gnk2-homologous domain
OS02G0644000	osa-miR1436	-	Peptidase C13, legumain
OS02G0644100	osa-miR1436	-	Tetratricopeptide repeat||Tetratricopeptide TPR2||Heat shock chaperonin-binding||Tetratricopeptide repeat-containing domain||Tetratricopeptide TPR1||Tetratricopeptide-like helical
OS02G0644600	osa-miR1436,osa-miR1439	-	Tetratricopeptide-like helical||Pentatricopeptide repeat
OS02G0644700	osa-miR5825,osa-miR437,osa-miR5831	-	HotDog domain||Acyl-ACP thioesterase||Acyl-ACP-thioesterase, N-terminal
OS02G0645100	osa-miR1439,osa-miR812n-5p,osa-miR812k,osa-miR812n-3p,osa-miR1436	-	Protein of unknown function DUF3490||Kinesin, motor domain||P-loop containing nucleoside triphosphate hydrolase||Kinesin-like protein
OS02G0647900	osa-miR437,osa-miR5831,osa-miR812s,osa-miR812a	-	Aldehyde/histidinol dehydrogenase||Aldehyde dehydrogenase, C-terminal||Aldehyde dehydrogenase, N-terminal||Aldehyde dehydrogenase NAD(P)-dependent||Aldehyde dehydrogenase domain
OS02G0648300	osa-miR5833	-	Myb-like domain||SANT/Myb domain
OS02G0649300	novel_3	HOX24	Homeobox, conserved site||Homeobox domain||-||Leucine zipper, homeobox-associated||Helix-turn-helix motif
OS02G0650500	osa-miR156k	-	Protein kinase, ATP binding site||Serine/threonine-protein kinase, active site||Protein kinase-like domain||Concanavalin A-like lectin/glucanase, subgroup||Serine-threonine/tyrosine-protein kinase catalytic domain||Protein kinase domain
OS02G0652000	osa-miR1857-5p	-	Cyclin PHO80-like
OS02G0652100	osa-miR1436,osa-miR818a	-	DNA-binding WRKY
OS02G0652550	osa-miR815a	-	MSP domain||Vesicle-associated membrane protein
OS02G0652600	osa-miR1436	-	Ribosomal protein L19||Translation protein SH3-like domain
OS02G0653200	osa-miR408-3p	-	Plastocyanin-like
OS02G0654500	osa-miR1436,osa-miR1439	-	Peptidase C12, ubiquitin carboxyl-terminal hydrolase 1
OS02G0661900	osa-miR1436	-	Vesicle-associated membrane protein||MSP domain
OS02G0662700	osa-miR171a,osa-miR171b,osa-miR171i-3p	-	Transcription factor GRAS
OS02G0663100	osa-miR171i-3p,osa-miR171b,osa-miR171a	-	Transcription factor GRAS
OS02G0663300	osa-miR164c,osa-miR437	-	PH-BEACH domain||BEACH domain||WD40-repeat-containing domain||WD40/YVTN repeat-like-containing domain||WD40 repeat
OS02G0664100	osa-miR1436	-	UDP-glucose:Glycoprotein Glucosyltransferase
OS02G0665200	osa-miR164c,osa-miR164d,osa-miR164a,osa-miR164e	-	Mitochondrial substrate/solute carrier||Mitochondrial carrier domain
OS02G0669000	osa-miR1439,osa-miR5540	-	Lipase, GDSL||SGNH hydrolase-type esterase domain
OS02G0670700	osa-miR818a	-	Tetratricopeptide-like helical||Pentatricopeptide repeat
OS02G0672100	osa-miR156k	-	Zinc finger, double-stranded RNA binding||Zinc finger, C2H2||C2H2 zinc finger protein, plant||Zinc finger C2H2-type/integrase DNA-binding domain||Zinc finger, C2H2-like
OS02G0674700	osa-miR2873b,novel_3	-	Zinc finger, RING/FYVE/PHD-type||Zinc finger, RING-type
OS02G0675700	osa-miR1850.1	-	Putative S-adenosyl-L-methionine-dependent methyltransferase||S-adenosyl-L-methionine-dependent methyltransferase-like
OS02G0676400	osa-miR166g-3p,osa-miR166m,osa-miR166a-3p	-	Multi antimicrobial extrusion protein
OS02G0678200	osa-miR2905,osa-miR812g,osa-miR1876	-	SPX, N-terminal||Major facilitator superfamily||Major facilitator superfamily domain
OS02G0678800	osa-miR396f-5p,osa-miR396e-5p,osa-miR396g	GRF10	-||Growth-regulating factor||Glutamine-Leucine-Glutamine, QLQ
OS02G0681632	osa-miR6249a	-	LysM domain
OS02G0682200	osa-miR5337a,osa-miR5788	MADS6	Transcription factor, MADS-box||Transcription factor, K-box
OS02G0682600	osa-miR815a	TIM13	Tim10/DDP family zinc finger
OS02G0687900	osa-miR6248	-	Alpha/Beta hydrolase fold||Peptidase S10, serine carboxypeptidase
OS02G0688500	osa-miR437,osa-miR1436,osa-miR5161	-	Glycosyl transferase, ALG6/ALG8
OS02G0689800	osa-miR6248	-	Myb-like domain||Helicase, C-terminal||P-loop containing nucleoside triphosphate hydrolase
OS02G0693700	osa-miR818a,osa-miR1436	-	AAA+ ATPase domain||ABC transporter-like||P-loop containing nucleoside triphosphate hydrolase||ABC transporter type 1, transmembrane domain||ABC transporter, conserved site
OS02G0694201	osa-miR1436	-	Acyl-CoA N-acyltransferase
OS02G0694900	osa-miR2100-5p	-	Serine/threonine- / dual specificity protein kinase, catalytic domain||Serine/threonine-protein kinase, active site||Protein kinase-like domain||Protein kinase, ATP binding site||Protein kinase domain
OS02G0696900	osa-miR156b-3p	-	SANT/Myb domain||Myb domain, plants
OS02G0697400	osa-miR812f	4CL2	AMP-dependent synthetase/ligase||AMP-binding, conserved site||AMP-binding enzyme C-terminal domain
OS02G0697800	osa-miR818a,osa-miR529b	SCAMP5	-
OS02G0698800	osa-miR1439	-	DNA-binding WRKY||WRKY transcription factor, group IIe
OS02G0700700	osa-miR1848	BRXL2	Brevis radix (BRX) domain||Transcription factor BREVIS RADIX, N-terminal domain
OS02G0702400	osa-miR1436	-	Protein notum homologue||Alpha/Beta hydrolase fold
OS02G0702500	osa-miR6248	-	Protein kinase domain||Protein kinase, ATP binding site||Serine/threonine-protein kinase, active site||Serine/threonine- / dual specificity protein kinase, catalytic domain||Protein kinase-like domain
OS02G0704000	osa-miR6249a	-	Carotenoid oxygenase
OS02G0705600	osa-miR1436	-	Zinc finger, RING/FYVE/PHD-type||Armadillo-like helical||U box domain||Armadillo-type fold
OS02G0706600	osa-miR5819	ZHD7	Homeodomain, ZF-HD class||ZF-HD homeobox protein, Cys/His-rich dimerisation domain||-
OS02G0707900	osa-miR6248	-	Rossmann-like alpha/beta/alpha sandwich fold||Universal stress protein A
OS02G0708100	osa-miR1436	CARA	Glutamine amidotransferase||Class I glutamine amidotransferase-like||Carbamoyl-phosphate synthase, small subunit||Carbamoyl-phosphate synthase, small subunit N-terminal domain
OS02G0714300	osa-miR1848	-	HSP20-like chaperone||Alpha crystallin/Hsp20 domain||ARID/BRIGHT DNA-binding domain
OS02G0716800	osa-miR5817	-	Proton-dependent oligopeptide transporter family||Major facilitator superfamily domain
OS02G0717400	osa-miR1436	-	Clustered mitochondria protein||Tetratricopeptide-like helical||CLU domain||Clustered mitochondria protein, N-terminal||GSKIP domain||Tetratricopeptide repeat||Tetratricopeptide repeat-containing domain
OS02G0720700	osa-miR5522,osa-miR2098-5p	-	CBS domain||Chloride channel, core||Chloride channel, voltage gated
OS02G0720900	osa-miR437	-	Aspartic peptidase domain||Aspartic peptidase||Aspartic peptidase, active site
OS02G0722001	osa-miR5515	-	Rossmann-like alpha/beta/alpha sandwich fold||Tyrosine-tRNA ligase, archaeal/eukaryotic-type||Aminoacyl-tRNA synthetase, class Ic
OS02G0722800	osa-miR156a,osa-miR156l-5p	-	WD40/YVTN repeat-like-containing domain||WD40 repeat||WD40-repeat-containing domain
OS02G0727100	osa-miR812n-3p,osa-miR812k,osa-miR812n-5p	-	Amino acid transporter, transmembrane
OS02G0728100	osa-miR5155	-	Peptidase S49, SppA||Peptidase S49||Peptidase S49, protease IV||ClpP/crotonase-like domain
OS02G0728300	osa-miR1436	-	TRAM/LAG1/CLN8 homology domain||Longevity assurance, LAG1/LAC1
OS02G0728700	osa-miR1436	-	Ribosomal RNA-processing protein 7
OS02G0729300	osa-miR166i-3p,osa-miR166a-3p,osa-miR166m,osa-miR166g-3p	-	Zinc finger, CCHC-type
OS02G0729700	novel_3	HOX16	Helix-turn-helix motif||Leucine zipper, homeobox-associated||Homeobox, conserved site||Homeobox domain||-
OS02G0730700	osa-miR1846d-3p	-	Aspartic peptidase domain||Aspartic peptidase||Aspartic peptidase, active site
OS02G0731200	osa-miR444f,osa-miR444d.3,osa-miR444b.1,osa-miR444a-3p.2,osa-miR444b.2,osa-miR444a-3p.1	MADS57	Transcription factor, MADS-box||Transcription factor, K-box
OS02G0731400	osa-miR408-3p	-	Blue (type 1) copper protein, binding site||Plastocyanin-like
OS02G0732500	osa-miR2275c	-	P-loop containing nucleoside triphosphate hydrolase||Small GTPase superfamily, ARF type||Small GTPase superfamily, Rab type||Small GTPase superfamily, ARF/SAR type||Small GTP-binding protein domain||Small GTPase superfamily, Ras type||Small GTPase superfamily, SAR1-type
OS02G0733300	osa-miR1436,osa-miR156k,osa-miR1439	-	Glycoside hydrolase, family 9||Six-hairpin glycosidase-like||Six-hairpin glycosidase||Glycoside hydrolase, family 9, active site
OS02G0734600	osa-miR5825	-	EF-hand domain pair||EF-hand domain
OS02G0736100	osa-miR6249a	MAP70.2	Microtubule-associated protein 70
OS02G0739000	osa-miR5083	-	Helicase, C-terminal||P-loop containing nucleoside triphosphate hydrolase||DNA/RNA helicase, DEAD/DEAH box type, N-terminal||Helicase, superfamily 1/2, ATP-binding domain||DSH, C-terminal
OS02G0741700	osa-miR2121a	-	Protein of unknown function DUF4228, plant
OS02G0742800	osa-miR5513	-	Kinesin-like protein
OS02G0745600	osa-miR1439,osa-miR1436	-	Development/cell death domain
OS02G0749500	osa-miR1436	-	Exocyst complex component Sec6
OS02G0751100	osa-miR5147	-	Aspartic peptidase||Aspartic peptidase, active site||Aspartic peptidase domain
OS02G0761600	osa-miR820a,osa-miR390-3p	-	Apple-like
OS02G0762100	osa-miR437	-	Ribonuclease E inhibitor RraA/Dimethylmenaquinone methyltransferase||Regulator of ribonuclease activity A
OS02G0763200	osa-miR1861n	-	Xyloglucan fucosyltransferase
OS02G0763900	osa-miR1436	-	Xyloglucan fucosyltransferase
OS02G0764200	osa-miR812s,osa-miR812a	-	Xyloglucan fucosyltransferase
OS02G0767000	osa-miR6248	-	Remorin, C-terminal
OS02G0769200	osa-miR1436	-	LysM domain
OS02G0770500	osa-miR6249a	-	DNA-binding WRKY
OS02G0770700	osa-miR2873a	-	SEPARIN core domain||Peptidase C50, separase
OS02G0771400	osa-miR2864.2	-	Protein-tyrosine phosphatase, SIW14-like||Protein-tyrosine phosphatase, dual specificity phosphatase, eukaryotic||Protein-tyrosine phosphatase-like||Protein-tyrosine phosphatase, active site
OS02G0771600	osa-miR812g,osa-miR812p,osa-miR812f,osa-miR812k,osa-miR812s	-	Oxoglutarate/iron-dependent dioxygenase||Non-haem dioxygenase N-terminal domain||Isopenicillin N synthase-like
OS02G0772300	osa-miR444b.1	-	Acyl-CoA N-acyltransferase||GNAT domain
OS02G0775400	novel_3	-	Kinesin, motor domain||P-loop containing nucleoside triphosphate hydrolase||Kinesin-like protein||Kinesin, motor region, conserved site
OS02G0776400	osa-miR169n,osa-miR169b,osa-miR169h,osa-miR169r-5p,osa-miR169a,osa-miR169e,osa-miR169f.1	-	CCAAT-binding transcription factor, subunit B
OS02G0776900	osa-miR396g,osa-miR396e-5p,osa-miR396f-5p	GRF1	Growth-regulating factor||-||Glutamine-Leucine-Glutamine, QLQ
OS02G0777100	osa-miR1442,osa-miR7694-3p,osa-miR156k	-	dDENN domain||DENN domain||uDENN domain
OS02G0778200	osa-miR3979-3p	-	Isoleucine-tRNA ligase, type 1||Aminoacyl-tRNA synthetase, class 1a, anticodon-binding||Aminoacyl-tRNA synthetase, class Ia||Aminoacyl-tRNA synthetase, class I, conserved site||Valyl/Leucyl/Isoleucyl-tRNA synthetase, editing domain||Isoleucine-tRNA ligase||Rossmann-like alpha/beta/alpha sandwich fold||Valyl/Leucyl/Isoleucyl-tRNA synthetase, class I, anticodon-binding||Zinc finger, DNA glycosylase…
OS02G0778400	osa-miR1436	-	P-loop containing nucleoside triphosphate hydrolase||UMP-CMP kinase||Adenylate kinase
OS02G0779200	osa-miR166j-5p,osa-miR5337b,osa-miR5819	-	Proteinase inhibitor I9||Peptidase S8, subtilisin-related||Peptidase S8, subtilisin, Ser-active site||Peptidase S8/S53 domain||Protease-associated domain, PA
OS02G0780550	osa-miR1428b	-	Domain of unknown function DUF1771||Ataxin-2, C-terminal
OS02G0780600	osa-miR1436,osa-miR439a	-	mRNA (guanine-N(7))-methyltransferase domain||S-adenosyl-L-methionine-dependent methyltransferase-like
OS02G0780800	osa-miR5161,osa-miR437	-	Helicase, C-terminal||DNA helicase, ATP-dependent, RecQ type||Helicase, superfamily 1/2, ATP-binding domain||DNA/RNA helicase, DEAD/DEAH box type, N-terminal||P-loop containing nucleoside triphosphate hydrolase
OS02G0782100	osa-miR1857-3p	-	Armadillo-type fold||Armadillo-like helical||Uncharacterised domain NUC173
OS02G0782200	osa-miR1436,osa-miR818a	-	NOT2/NOT3/NOT5
OS02G0782600	osa-miR818a,osa-miR1436	-	Synaptojanin, N-terminal||Phosphoinositide phosphatase SAC
OS02G0785200	osa-miR2871a-3p	-	Glycosyl transferase, family 31
OS02G0786400	novel_3	-	SANT/Myb domain||Myb domain||Allergen V5/Tpx-1-related, conserved site||Cysteine-rich secretory protein, allergen V5/Tpx-1-related||CAP domain
OS02G0787200	osa-miR1436	-	Protein kinase domain||Concanavalin A-like lectin/glucanase, subgroup||Serine/threonine- / dual specificity protein kinase, catalytic domain||Rossmann-like alpha/beta/alpha sandwich fold||Protein kinase-like domain||Serine/threonine-protein kinase, active site
OS02G0787600	osa-miR1439,osa-miR818a,osa-miR1436	-	Extracellular ligand-binding receptor||Periplasmic binding protein-like I||Ionotropic glutamate receptor||Ionotropic glutamate receptor, plant
OS02G0787800	osa-miR5831,osa-miR437,osa-miR1436,osa-miR5825	-	ATP-NAD kinase-like domain||Diacylglycerol kinase, accessory domain||Diacylglycerol kinase, catalytic domain||Diacylglycerol kinase, plant
OS02G0789400	osa-miR812a,osa-miR812n-5p	RSZP21	Nucleotide-binding, alpha-beta plait||RNA recognition motif domain||Zinc finger, CCHC-type
OS02G0789600	osa-miR5833	-	WD40/YVTN repeat-like-containing domain||Vacuolar import/degradation, Vid27-related
OS02G0789700	osa-miR1436,osa-miR3981-3p	-	Nucleotide-binding, alpha-beta plait||Protein of unknown function DUF3355
OS02G0791800	osa-miR5821	-	WD40-repeat-containing domain||WD40 repeat||WD40/YVTN repeat-like-containing domain
OS02G0792500	osa-miR1436	-	Domain of unknown function DUF239||Domain of unknown function DUF4409
OS02G0793300	osa-miR444f,osa-miR1436	-	NUDIX hydrolase domain||NUDIX hydrolase domain-like
OS02G0794900	osa-miR1439,osa-miR1436	FH7	Formin, FH2 domain||Tensin phosphatase, C2 domain||Protein-tyrosine phosphatase-like
OS02G0795000	osa-miR167h-3p	-	Peptidase C19, ubiquitin carboxyl-terminal hydrolase 2, conserved site||Ubiquitin carboxyl-terminal hydrolase-like domain||Ubiquitin carboxyl-terminal hydrolases family 2
OS02G0795300	osa-miR1862f	-	Zinc finger, RING-type, conserved site||Zinc finger, RING-type||Tetratricopeptide-like helical||Zinc finger, RING/FYVE/PHD-type
OS02G0796300	osa-miR2905	-	Ribonuclease H-like domain||Ribonuclease CAF1
OS02G0797300	osa-miR5799	-	Cation-transporting P-type ATPase||P-type ATPase, phosphorylation site||H+ transporting P-type ATPase, subfamily IIIA||HAD-like domain||P-type ATPase, transmembrane domain||P-type ATPase, A domain||P-type ATPase, cytoplasmic domain N
OS02G0797700	novel_3	-	Nonaspanin (TM9SF)
OS02G0798700	osa-miR1436	-	Armadillo-type fold
OS02G0802500	osa-miR529a	-	Pyrophosphate-energised proton pump
OS02G0803200	osa-miR5819	-	Ribosomal protein S15, bacterial-type||S15/NS1, RNA-binding||Ribosomal protein S15
OS02G0803250	osa-miR167a-5p	-	NatC N(alpha)-terminal acetyltransferase, Mak10 subunit
OS02G0804500	osa-miR818a	-	DnaJ domain||Chaperone DnaJ, C-terminal||DnaJ domain, conserved site||Chaperone DnaJ||Heat shock protein DnaJ, cysteine-rich domain||HSP40/DnaJ peptide-binding
OS02G0804600	osa-miR1846e	-	NAD(P)-binding domain||Rhodanese-like domain||Adenylyltransferase and sulfurtransferase MOCS3/Uba4||UBA/THIF-type NAD/FAD binding fold
OS02G0805200	osa-miR5542	-	Proliferating cell nuclear antigen, PCNA||Proliferating cell nuclear antigen, PCNA, conserved site||Proliferating cell nuclear antigen, PCNA, N-terminal||Proliferating cell nuclear antigen, PCNA, C-terminal
OS02G0805600	osa-miR1848	-	Alcohol dehydrogenase superfamily, zinc-type||Alcohol dehydrogenase GroES-like||GroES (chaperonin 10)-like||Alcohol dehydrogenase, C-terminal||NAD(P)-binding domain||Polyketide synthase, enoylreductase||Quinone oxidoreductase PIG3
OS02G0805800	osa-miR1436,osa-miR818a,osa-miR1439	-	Protein kinase-like domain||UbiB domain||Aminoglycoside phosphotransferase||Protein kinase domain
OS02G0807100	osa-miR172a,osa-miR172b	-	Starch synthase, catalytic domain
OS02G0807700	osa-miR1439	-	Zinc finger, LSD1-type
OS02G0807800	osa-miR827	-	Protein kinase domain||EGF-type aspartate/asparagine hydroxylation site||Serine/threonine- / dual specificity protein kinase, catalytic domain||Serine/threonine-protein kinase, active site||Protein kinase-like domain||Concanavalin A-like lectin/glucanase, subgroup||EGF-like calcium-binding, conserved site||Epidermal growth factor-like domain||Wall-associated receptor kinase galacturonan-binding d…
OS02G0810900	osa-miR6248	-	NAC domain
OS02G0812400	osa-miR1436,osa-miR815a,osa-miR1320-5p	-	Nucleotide-diphospho-sugar transferases||W2 domain||Armadillo-type fold||MIF4-like, type 1/2/3||Nucleotidyl transferase||Bacterial transferase hexapeptide repeat
OS02G0813000	osa-miR1436,osa-miR1439	-	Phloem protein 2-like||F-box domain
OS02G0813500	osa-miR818a	GRC2	Glutathione-disulphide reductase||FAD/NAD-linked reductase, dimerisation domain||Pyridine nucleotide-disulphide oxidoreductase, class I, active site||Pyridine nucleotide-disulphide oxidoreductase, dimerisation domain||Pyridine nucleotide-disulphide oxidoreductase, FAD/NAD(P)-binding domain
OS02G0814800	osa-miR6249a	-	Thioredoxin-like fold||Glutathione S-transferase, C-terminal-like||Glutathione S-transferase, N-terminal||Glutathione S-transferase (GST)
OS02G0815000	osa-miR5150-5p	-	Ribosomal protein L37ae/L37e||Zinc-binding ribosomal protein||Ribosomal protein L37e, conserved site||Ribosomal protein L37e
OS02G0816900	osa-miR2864.2	-	IQ motif, EF-hand binding site||Myosin-like IQ motif-containing domain||Myosin head, motor domain||P-loop containing nucleoside triphosphate hydrolase
OS02G0817000	osa-miR5538	-	Myb-like domain
OS02G0817700	osa-miR2097-3p	-	Thiolase, conserved site||Thiolase, C-terminal||Thiolase, active site||Thiolase, acyl-enzyme intermediate active site||Thiolase, N-terminal
OS02G0818700	osa-miR172d-5p	-	S-adenosyl-L-methionine-dependent methyltransferase-like||Nicotinamide N-methyltransferase-like
OS02G0819500	osa-miR5512a	-	Ovarian tumour, otubain
OS02G0820700	osa-miR5819	-	Target SNARE coiled-coil domain
OS02G0822400	osa-miR818a,osa-miR1436	-	NAC domain
OS02G0822800	osa-miR2867-3p	-	Kelch repeat type 1||Kelch repeat type 2||Kelch-type beta propeller
OS02G0827600	osa-miR172a	-	Protein of unknown function DUF3531
OS02G0828900	osa-miR5542	-	Zinc-finger domain of monoamine-oxidase A repressor R1||JmjC domain||Zinc finger, RING-type
OS02G0829500	osa-miR810b.2	-	Beta-lactamase-like
OS02G0829600	osa-miR810b.2	-	Beta-lactamase-like||Zinc finger, RING/FYVE/PHD-type||Isopenicillin N synthase-like
OS02G0830000	osa-miR5147	-	Pentatricopeptide repeat||Tetratricopeptide-like helical
OS02G0830700	osa-miR1860-5p	-	Leucine-rich repeat-containing N-terminal, type 2
OS02G0831300	osa-miR1436	-	Beta-catenin-like protein 1, N-terminal||Armadillo-type fold||Armadillo-like helical
OS02G0832800	osa-miR1436,osa-miR1439	-	Nucleotide-diphospho-sugar transferases||Glycosyl transferase, family 13
OS02G0832900	osa-miR166k-5p	-	Nucleotide-binding, alpha-beta plait
OS02G0833400	osa-miR5159	-	Protein of unknown function DUF760
OS02G0834700	osa-miR818a	-	Domain of unknown function DUF1731, C-terminal||NAD-dependent epimerase/dehydratase||NAD(P)-binding domain||Sugar nucleotide epimerase YfcH,-like putative
OS03G0100800	osa-miR156a,osa-miR1436	-	H+ transporting P-type ATPase, subfamily IIIA||HAD-like domain||P-type ATPase, A domain||P-type ATPase, cytoplasmic domain N||P-type ATPase, phosphorylation site||Cation-transporting P-type ATPase||Cation-transporting P-type ATPase, N-terminal||P-type ATPase, transmembrane domain
OS03G0102333	osa-miR437,osa-miR5825	-	CCR4-Not complex, Not1 subunit, domain of unknown function DUF3819
OS03G0102366	osa-miR6248	-	CCR4-Not complex component, Not1, C-terminal
OS03G0103000	osa-miR437	-	Proton-dependent oligopeptide transporter family||PTR2 family proton/oligopeptide symporter, conserved site||Major facilitator superfamily domain
OS03G0109300	osa-miR5788,osa-miR5825,osa-miR818a	LOGL3	LOG family||Cytokinin riboside 5'-monophosphate phosphoribohydrolase LOG
OS03G0109400	osa-miR6248	HOX10	-||START domain||Homeobox domain||START-like domain
OS03G0109900	osa-miR437,osa-miR6248	-	Trypsin-like cysteine/serine peptidase domain
OS03G0110800	osa-miR820a	-	S-adenosyl-L-methionine-dependent methyltransferase-like||SAM-dependent methyltransferase DRM
OS03G0112101	osa-miR1320-5p	-	Clathrin/coatomer adaptor, adaptin-like, N-terminal||Armadillo-like helical||Armadillo-type fold
OS03G0112400	osa-miR1436	-	Clathrin adaptor, alpha-adaptin, appendage, C-terminal subdomain||Coatomer/calthrin adaptor appendage, C-terminal subdomain||Adaptor protein complex AP-1, gamma subunit||Clathrin alpha-adaptin/coatomer adaptor, appendage, C-terminal subdomain
OS03G0112700	osa-miR5339	-	Zinc finger, CCCH-type
OS03G0114800	osa-miR812o-5p	-	Protein of unknown function DUF791||Major facilitator superfamily domain
OS03G0116300	osa-miR812a	-	Alpha/beta hydrolase fold-5||Alpha/Beta hydrolase fold
OS03G0120100	osa-miR5794	-	Protein of unknown function DUF284, transmembrane eukaryotic
OS03G0121901	novel_4	DCL1	P-loop containing nucleoside triphosphate hydrolase
OS03G0122000	osa-miR1436,osa-miR818a	-	Protein kinase, ATP binding site||Serine/threonine- / dual specificity protein kinase, catalytic domain||Serine/threonine-protein kinase, active site||Protein kinase-like domain||Protein kinase domain
OS03G0123100	osa-miR156k	-	Ubiquitin-conjugating enzyme/RWD-like||SUMO-conjugating enzyme Ubc9||Ubiquitin-conjugating enzyme, active site||Ubiquitin-conjugating enzyme, E2
OS03G0124000	osa-miR1436	-	POX domain||Homeobox domain||Homeobox KN domain
OS03G0125100	osa-miR5817	-	Fatty acid hydroxylase
OS03G0129200	osa-miR1861n	-	PIN domain||Nucleic acid-binding, OB-fold||PIN domain-like
OS03G0129800	osa-miR815a	-	Nucleotide-diphospho-sugar transferases||Nucleotide-diphospho-sugar transferase
OS03G0131200	osa-miR5825	-	Catalase core domain||Catalase haem-binding site||Catalase, mono-functional, haem-containing||Catalase, mono-functional, haem-containing, clades 1 and 3||Catalase immune-responsive domain||Catalase active site||Catalase-like domain
OS03G0131500	osa-miR390-3p,osa-miR820a	-	Vitamin K epoxide reductase||Thioredoxin-like fold
OS03G0132000	osa-miR5808,osa-miR5801	4CLL4	AMP-dependent synthetase/ligase||AMP-binding, conserved site||AMP-binding enzyme C-terminal domain
OS03G0132300	osa-miR1436,osa-miR818a	-	TB2/DP1/HVA22-related protein
OS03G0132800	osa-miR5810	-	Protein kinase-like domain||Protein kinase domain||Tetratricopeptide-like helical
OS03G0135600	osa-miR1441	-	Ankyrin repeat||Ankyrin repeat-containing domain
OS03G0135700	novel_3,osa-miR2096-5p	-	Myc-type, basic helix-loop-helix (bHLH) domain
OS03G0137300	osa-miR1850.1	-	Protein of unknown function DUF3353
OS03G0138700	osa-miR1436	-	Proton-dependent oligopeptide transporter family||Major facilitator superfamily domain
OS03G0140200	osa-miR1427	-	Cytochrome P450, B-class||Cytochrome P450, conserved site||Cytochrome P450
OS03G0144800	osa-miR5512a	-	Exostosin-like
OS03G0145300	osa-miR1848	-	Glycosyl transferase, family 14
OS03G0145800	osa-miR5485	-	Ankyrin repeat-containing domain||Ankyrin repeat
OS03G0145900	osa-miR3981-3p,osa-miR1436	-	Zinc finger, CHY-type
OS03G0147400	osa-miR814a,osa-miR1436	-	Citrate transporter-like domain
OS03G0147700	osa-miR6253	-	S-adenosyl-L-methionine-dependent methyltransferase-like||DNA methylase, N-6 adenine-specific, conserved site
OS03G0151300	osa-miR529b,osa-miR2121a	-	Transcription factor jumonji, JmjN||JmjC domain
OS03G0153100	osa-miR1436	-	Monooxygenase, FAD-binding
OS03G0156300	osa-miR529b	EXPA20	Expansin/Lol pI||Expansin/pollen allergen, DPBB domain||Expansin, cellulose-binding-like domain||RlpA-like double-psi beta-barrel domain||-
OS03G0157400	osa-miR5337a	-	P-loop containing nucleoside triphosphate hydrolase||ABC transporter, conserved site||ABC transporter-like||AAA+ ATPase domain||ABC-2 type transporter
OS03G0159400	osa-miR5819	-	Ovate protein family, C-terminal
OS03G0162900	osa-miR818a,osa-miR1436	-	Tetratricopeptide-like helical||Pentatricopeptide repeat
OS03G0163500	osa-miR815a	-	Exocyst complex subunit Sec15-like
OS03G0165266	osa-miR2275c	-	Helicase, C-terminal||P-loop containing nucleoside triphosphate hydrolase||SNF2-related||Helicase, superfamily 1/2, ATP-binding domain
OS03G0166800	osa-miR408-3p	-	Endonuclease/exonuclease/phosphatase
OS03G0167800	osa-miR1876	-	Galactose oxidase, beta-propeller||F-box domain||Kelch repeat type 1
OS03G0168300	osa-miR156k	-	Protein of unknown function DUF1997
OS03G0168400	osa-miR1436	-	Tetratricopeptide-like helical||Pentatricopeptide repeat
OS03G0168500	osa-miR1436	-	Thioredoxin domain||Thioredoxin-like fold
OS03G0170400	osa-miR5788,osa-miR3981-5p	-	Concanavalin A-like lectin/glucanase, subgroup||Protein kinase, ATP binding site||Protein kinase-like domain||Serine/threonine-protein kinase, active site||Protein kinase domain||Serine-threonine/tyrosine-protein kinase catalytic domain
OS03G0170900	novel_3	SUT1	Sucrose/H+ symporter, plant||Major facilitator superfamily domain
OS03G0171300	osa-miR319a-3p.2-3p	ILI6	Myc-type, basic helix-loop-helix (bHLH) domain
OS03G0173500	osa-miR5526	-	Kinase associated protein phosphatase||Protein phosphatase 2C
OS03G0174600	osa-miR5337b,osa-miR5337a	-	Rossmann-like alpha/beta/alpha sandwich fold||tRNA-specific 2-thiouridylase||Adenine nucleotide alpha hydrolase-like domains
OS03G0174900	osa-miR169h,osa-miR169r-5p,osa-miR1440b,osa-miR169b,osa-miR169e,osa-miR169a,osa-miR169f.1	-	CCAAT-binding transcription factor, subunit B||CCAAT-binding factor, conserved site
OS03G0176300	osa-miR812v	-	AP2/ERF domain||DNA-binding domain||AP2-like ethylene-responsive transcription factor
OS03G0178400	osa-miR1436,osa-miR1439	-	Alpha/Beta hydrolase fold||Epoxide hydrolase-like||Alpha/beta hydrolase fold-1
OS03G0178500	osa-miR5788,osa-miR815a	-	Alpha/beta hydrolase fold-1||Alpha/Beta hydrolase fold
OS03G0180300	osa-miR5788	-	Smr protein/MutS2 C-terminal||Ataxin-2, C-terminal
OS03G0180400	osa-miR535-3p	PAA1	Proteasome, subunit alpha/beta||Proteasome, alpha-subunit, N-terminal domain||Nucleophile aminohydrolases, N-terminal||Proteasome A-type subunit
OS03G0181500	osa-miR1441	-	3-Oxoacyl-[acyl-carrier-protein (ACP)] synthase III C-terminal||FAE1/Type III polyketide synthase-like protein||Very-long-chain 3-ketoacyl-CoA synthase
OS03G0181600	osa-miR1436	-	FAR1 DNA binding domain||MULE transposase domain||FHY3/FAR1 family||Zinc finger, SWIM-type||Zinc finger, GATA-type||Zinc finger, NHR/GATA-type||Zinc finger, PMZ-type
OS03G0182400	osa-miR395o,osa-miR395c	-	Phosphoinositide phosphatase SAC||Synaptojanin, N-terminal
OS03G0184600	osa-miR818a,osa-miR1436	-	NAD-dependent epimerase/dehydratase||NAD(P)-binding domain
OS03G0185200	osa-miR815a	-	Pentatricopeptide repeat||Tetratricopeptide-like helical
OS03G0185700	osa-miR812n-3p	-	Chloramphenicol acetyltransferase-like domain
OS03G0186600	novel_3	-	Transcription factor, K-box||Transcription factor, MADS-box
OS03G0188100	osa-miR437	-	Multi antimicrobial extrusion protein
OS03G0189400	osa-miR1436	-	NAD(P)-binding domain||GroES (chaperonin 10)-like||Alcohol dehydrogenase, C-terminal||Alcohol dehydrogenase, zinc-type, conserved site||Alcohol dehydrogenase superfamily, zinc-type||Alcohol dehydrogenase GroES-like
OS03G0189600	osa-miR5801	-	Alcohol dehydrogenase, C-terminal||GroES (chaperonin 10)-like||Alcohol dehydrogenase, zinc-type, conserved site||Alcohol dehydrogenase superfamily, zinc-type||Alcohol dehydrogenase GroES-like||NAD(P)-binding domain
OS03G0190300	osa-miR393b-3p	-	Leucine-rich repeat, typical subtype||Leucine-rich repeat
OS03G0192300	osa-miR812q,osa-miR1436	-	Protein of unknown function DUF966
OS03G0192600	osa-miR1439	-	Plant lipid transfer protein/Par allergen||Bifunctional inhibitor/plant lipid transfer protein/seed storage helical domain
OS03G0193000	osa-miR1862d,osa-miR1862e	-	Scarecrow-like protein 13||Transcription factor GRAS
OS03G0193400	osa-miR818a	-	Amine oxidase
OS03G0195300	osa-miR395w,osa-miR395a,osa-miR395c,osa-miR395b,osa-miR395o,osa-miR395f	-	Sulphate anion transporter, conserved site||Sulphate transporter||Sulphate anion transporter||Plant low affinity sulfate transporter||STAS domain
OS03G0195500	osa-miR395o,osa-miR395f,osa-miR395b,osa-miR395a,osa-miR395c,osa-miR395w	-	Sulphate anion transporter, conserved site||Sulphate anion transporter||Sulphate transporter||Plant low affinity sulfate transporter
OS03G0196400	osa-miR2055,osa-miR529b	-	Uncharacterised protein family UPF0497, trans-membrane plant||Uncharacterised protein family UPF0497, trans-membrane plant subgroup
OS03G0198300	osa-miR1436	-	DnaJ domain
OS03G0199000	osa-miR1436	-	Chloroquine resistance transporter-related
OS03G0201800	osa-miR1439	-	Glycoside hydrolase, superfamily||Glycoside hydrolase, family 10||Glycoside hydrolase, catalytic domain
OS03G0201901	osa-miR5817	-	Carbohydrate-binding, CenC-like||Galactose-binding domain-like||Glycoside hydrolase, superfamily||Glycoside hydrolase, catalytic domain||Glycoside hydrolase, family 10
OS03G0202500	osa-miR5804	-	F-box domain
OS03G0204100	osa-miR1436	FH8	Formin, FH2 domain
OS03G0205500	osa-miR1436	-	Cytochrome b5-like heme/steroid binding domain
OS03G0209400	osa-miR5510	-	Vesicle transport protein, Got1/SFT2-like
OS03G0211800	osa-miR827,novel_4	-	Nucleotide-diphospho-sugar transferases||Plant galacturonosyltransferase GAUT||Glycosyl transferase, family 8
OS03G0214000	osa-miR1436	-	Purple acid phosphatase-like, N-terminal||Purple acid phosphatase, N-terminal||Metallo-dependent phosphatase-like||Iron/zinc purple acid phosphatase-like C-terminal domain||Phosphoesterase domain
OS03G0215200	osa-miR1436	DL	YABBY protein||High mobility group box domain
OS03G0216700	osa-miR5512a,osa-miR167d-5p	-	Multi antimicrobial extrusion protein
OS03G0216800	osa-miR6248,osa-miR1439	-	Glycoside hydrolase, family 28||Parallel beta-helix repeat||Pectin lyase fold||Pectin lyase fold/virulence factor
OS03G0217200	osa-miR2275c	-	F-box domain||FBD domain
OS03G0221500	osa-miR1320-5p	-	Glycoside hydrolase, superfamily||Glycoside hydrolase, catalytic domain||Glycoside hydrolase, family 17
OS03G0223700	osa-miR1436	-	HEAT, type 2||Vacuole morphology and inheritance protein 14||Armadillo-type fold||Armadillo-like helical||Vacuolar protein 14 C-terminal Fig4-binding domain
OS03G0223900	osa-miR1848	-	Ribosomal protein S5 domain 2-type fold||UDP-3-O-acyl N-acetylglucosamine deacetylase, C-terminal||UDP-3-O-acyl N-acetylglucosamine deacetylase, N-terminal||UDP-3-O-acyl N-acetylglucosamine deacetylase
OS03G0224300	osa-miR5819	-	Glycosyl transferase, family 20||Trehalose-phosphatase||HAD-like domain||HAD-superfamily hydrolase, subfamily IIB
OS03G0225300	osa-miR5819	-	Pentatricopeptide repeat
OS03G0226800	osa-miR1436	-	Chromo domain||S-adenosyl-L-methionine-dependent methyltransferase-like||Chromo domain/shadow||DNA methylase, C-5 cytosine-specific, active site||Chromo domain-like||Chromo domain, conserved site||Bromo adjacent homology (BAH) domain||C-5 cytosine methyltransferase
OS03G0227400	osa-miR812a,osa-miR812s,osa-miR812o-3p	-	Glycoside hydrolase, superfamily||Glycoside hydrolase, family 17||Glycoside hydrolase, catalytic domain
OS03G0227700	osa-miR1436	-	Cytochrome P450, E-class, group I||Cytochrome P450
OS03G0227900	osa-miR1846a-3p	-	Protein kinase domain||Concanavalin A-like lectin/glucanase, subgroup||Protein kinase, ATP binding site||Serine/threonine- / dual specificity protein kinase, catalytic domain||Serine/threonine-protein kinase, active site||Protein kinase-like domain
OS03G0230500	osa-miR159e	ITPK2	Inositol-tetrakisphosphate 1-kinase
OS03G0233800	osa-miR1432-5p	-	Domain of unknown function DUF547||Ternary complex factor MIP1, leucine-zipper
OS03G0235000	osa-miR1439	-	Haem peroxidase, plant/fungal/bacterial||Peroxidases heam-ligand binding site||Haem peroxidase||Plant peroxidase
OS03G0235900	osa-miR1436,osa-miR6248	-	Proton-dependent oligopeptide transporter family||Major facilitator superfamily domain
OS03G0236200	novel_4	-	Pyridoxal phosphate-dependent decarboxylase||Glutamate decarboxylase||Pyridoxal phosphate-dependent transferase||Pyridoxal phosphate-dependent transferase, major region, subdomain 1
OS03G0236300	osa-miR3979-5p	-	Myb domain||SANT/Myb domain
OS03G0237000	osa-miR535-5p	-	Nonaspanin (TM9SF)||Major facilitator superfamily domain
OS03G0237250	novel_3	-	Zinc finger, C2H2-like||Zinc finger C2H2-type/integrase DNA-binding domain||C2H2 zinc finger protein, plant||Zinc finger, C2H2
OS03G0237600	osa-miR1436	-	Microtubule-associated protein, MAP65/Ase1/PRC1
OS03G0239200	osa-miR1436	-	Protein OBERON
OS03G0242900	novel_3	-	Peptidase S8, subtilisin, Ser-active site||Protease-associated domain, PA||Peptidase S8/S53 domain||Peptidase S8, subtilisin-related||Proteinase inhibitor I9
OS03G0243700	osa-miR439a	-	Glycosyl hydrolases family 10, active site||Glycoside hydrolase, catalytic domain||Glycoside hydrolase, family 10||Glycoside hydrolase, superfamily
OS03G0244000	osa-miR5810	-	Heat shock protein DnaJ, cysteine-rich domain
OS03G0246500	osa-miR5810	-	Filament-like plant protein
OS03G0246800	osa-miR166c-5p	-	Sec7 domain, alpha orthogonal bundle||Armadillo-type fold||Sec7 domain
OS03G0248250	osa-miR1863a	-	DNA glycosylase
OS03G0249200	osa-miR394	-	Peptide chain release factor class I/class II
OS03G0249400	osa-miR1436	-	Ribosomal protein S10, eukaryotic/archaeal||Ribosomal protein S10 domain||Ribosomal protein S10
OS03G0250200	osa-miR437	-	TB2/DP1/HVA22-related protein
OS03G0254800	osa-miR6248,osa-miR1436	-	Chorismate synthase, conserved site||Chorismate synthase
OS03G0255100	novel_3	-	Galactose-binding domain-like||Glycoside hydrolase, family 35, conserved site||Glycoside hydrolase, catalytic domain||Glycoside hydrolase 35, catalytic domain||Glycoside hydrolase, family 35||D-galactoside/L-rhamnose binding SUEL lectin domain||Glycoside hydrolase, superfamily
OS03G0256400	osa-miR818a,osa-miR1436	-	Imidazole glycerol phosphate synthase HisHF||Histidine biosynthesis||Imidazole glycerol phosphate synthase, subunit H||Histidine biosynthesis, HisF||Aldolase-type TIM barrel||Glutamine amidotransferase||Ribulose-phosphate binding barrel||Class I glutamine amidotransferase-like
OS03G0256800	osa-miR1436,osa-miR818a	-	Rho GTPase activation protein||Pleckstrin homology domain||Pleckstrin homology-like domain||Rho GTPase-activating protein domain
OS03G0259100	osa-miR408-3p	-	Plastocyanin-like
OS03G0259300	osa-miR818a,osa-miR1436	HRD3	Tetratricopeptide-like helical||-
OS03G0262300	osa-miR1439	-	AAA+ ATPase domain||Checkpoint protein Rad17/Rad24||ATPase, AAA-type, core||P-loop containing nucleoside triphosphate hydrolase
OS03G0263000	osa-miR5833	-	AP2/ERF domain||DNA-binding domain
OS03G0264000	osa-miR1862f,osa-miR1862a	-	TRAM/LAG1/CLN8 homology domain||Longevity assurance, LAG1/LAC1
OS03G0266000	osa-miR815a	-	Ovarian tumour, otubain
OS03G0267700	osa-miR1436	-	Mitochondrial substrate/solute carrier||Mitochondrial carrier domain||Mitochondrial carrier protein
OS03G0268000	osa-miR171h,osa-miR5788	-	Serine/threonine-specific protein phosphatase/bis(5-nucleosyl)-tetraphosphatase||Metallo-dependent phosphatase-like||Phosphoesterase domain
OS03G0268400	osa-miR812o-5p,osa-miR812a,osa-miR812o-3p	-	Nucleotidyl transferase||Bacterial transferase hexapeptide repeat||Nucleotide-diphospho-sugar transferases
OS03G0269900	osa-miR1441	-	Protein of unknown function DUF604
OS03G0273200	osa-miR397b,osa-miR397a	LAC10	Multicopper oxidase, type 2||Multicopper oxidase, type 1||-||Multicopper oxidase, type 3||Multicopper oxidase, copper-binding site
OS03G0275100	osa-miR1848	-	Protein phosphatase 2C (PP2C)-like domain||Protein phosphatase 2C
OS03G0275300	osa-miR444d.3	-	Ankyrin repeat||Ankyrin repeat-containing domain||Zinc finger, RING/FYVE/PHD-type||Zinc finger, RING-type
OS03G0275900	osa-miR6248,osa-miR1425-3p	-	Zinc finger, RING/FYVE/PHD-type||Armadillo-like helical||U box domain||Armadillo-type fold
OS03G0276800	osa-miR2097-3p	-	Heat shock protein 70, conserved site||Heat shock protein 70kD, peptide-binding domain||Heat shock protein 70 family
OS03G0276850	osa-miR395c,osa-miR5794	-	Glutamate dehydrogenase, NAD-specific
OS03G0277300	osa-miR2100-5p	-	Heat shock protein 70kD, peptide-binding domain||Heat shock protein 70 family||Heat shock protein 70, conserved site||Heat shock protein 70kD, C-terminal domain
OS03G0278000	osa-miR164e	-	NAD(P)-binding domain
OS03G0280700	osa-miR3979-5p	-	Protein of unknown function DUF3741||Domain of unknown function DUF4378
OS03G0283200	osa-miR1436	-	Glutathione S-transferase, C-terminal-like||Thioredoxin-like fold||Glutathione S-transferase, N-terminal
OS03G0283800	osa-miR818a,osa-miR529a,osa-miR1436	-	Rab-GTPase-TBC domain
OS03G0284500	osa-miR1436,osa-miR1848,osa-miR1439	-	HAD-superfamily hydrolase, subfamily IIA||HAD-like domain||HAD-superfamily hydrolase, subfamily IIA, CECR5
OS03G0285800	novel_3	MPK5	Serine/threonine- / dual specificity protein kinase, catalytic domain||Serine/threonine-protein kinase, active site||Protein kinase-like domain||Protein kinase, ATP binding site||Mitogen-activated protein (MAP) kinase, JNK||Mitogen-activated protein (MAP) kinase, conserved site||Protein kinase domain
OS03G0287100	osa-miR5150-5p	-	START-like domain||Phosphatidylinositol transfer protein
OS03G0288300	osa-miR5815	-	Alpha/beta hydrolase fold-1||Alpha/Beta hydrolase fold
OS03G0288800	osa-miR1426	-	Cytochrome B561-related
OS03G0289100	osa-miR1428e-3p	-	KA1 domain/Ssp2 C-terminal domain||Protein kinase, ATP binding site||Protein kinase domain||Serine/threonine- / dual specificity protein kinase, catalytic domain||Serine/threonine-protein kinase, active site||Protein kinase-like domain||Kinase associated domain 1 (KA1)||Ubiquitin-associated/translation elongation factor EF1B, N-terminal, eukaryote
OS03G0289400	osa-miR815a	-	Rhodanese-like domain
OS03G0292900	osa-miR1439,osa-miR5542	-	Importin-beta, N-terminal domain||Armadillo-type fold||Armadillo-like helical
OS03G0295800	osa-miR812o-3p,osa-miR156k,osa-miR812a	-	Gamma interferon inducible lysosomal thiol reductase GILT||Thioredoxin-like fold
OS03G0296500	osa-miR159d	-	Glycoside hydrolase, catalytic domain||Glycoside hydrolase, family 17||Glycoside hydrolase, superfamily
OS03G0297400	osa-miR2870	-	Acyl transferase||Acyl transferase/acyl hydrolase/lysophospholipase||Malonyl-CoA ACP transacylase, ACP-binding||Polyketide synthase, acyl transferase domain||Malonyl CoA-acyl carrier protein transacylase, FabD-type||Acyl transferase domain
OS03G0302200	osa-miR1848	-	Zinc finger, PHD-type||Zinc finger, FYVE/PHD-type||Zinc finger, PHD-finger||Zinc finger, RING/FYVE/PHD-type||Zinc finger, RING-type||Zinc finger, RING-type, conserved site
OS03G0302800	osa-miR171h	-	Glycoside hydrolase, family 47||Protein of unknown function DUF761, plant
OS03G0305000	osa-miR1441	-	AMP-dependent synthetase/ligase||AMP-binding, conserved site||AMP-binding enzyme C-terminal domain
OS03G0307100	osa-miR1857-5p	GEP	Peptidase S9, prolyl oligopeptidase, catalytic domain||Alpha/Beta hydrolase fold
OS03G0307700	osa-miR390-3p	-	Trichome birefringence-like family||PMR5 N-terminal domain||Protein trichome birefringence-like 6
OS03G0309200	osa-miR172d-5p	-	Histidine kinase-like ATPase, ATP-binding domain||Phytochrome chromophore binding site||Signal transduction histidine kinase, core||Signal transduction histidine kinase EnvZ-like, dimerisation/phosphoacceptor domain||GAF domain-like||Phytochrome A/B/C/D/E||PAS domain||PAS fold-2||Phytochrome chromophore attachment domain||PAS fold||Phytochrome, central region||GAF domain
OS03G0313000	osa-miR1436	-	ETC complex I subunit
OS03G0320400	osa-miR5512a	-	Pre-SET zinc-binding sub-group||Pre-SET domain||PUA-like domain||SRA-YDG
OS03G0320800	osa-miR5337a	-	Leucine-rich repeat||Leucine-rich repeat, typical subtype
OS03G0321000	osa-miR1425-5p	-	Cytochrome b5-like heme/steroid binding domain
OS03G0321800	osa-miR5337b,osa-miR5337a	-	Biotin/lipoate A/B protein ligase
OS03G0322500	osa-miR169e,osa-miR169f.1	-	Histidine triad (HIT) protein||HIT-like domain||Histidine triad, conserved site
OS03G0325600	osa-miR2905	WOX6	-||Homeobox domain
OS03G0325900	osa-miR1436,osa-miR814a,osa-miR812a	-	Ricin B lectin domain
OS03G0329500	osa-miR1441	GLU1	Six-hairpin glycosidase||Glycoside hydrolase, family 9, active site||Glycoside hydrolase, family 9||Six-hairpin glycosidase-like
OS03G0330200	osa-miR3981-5p,osa-miR437	-	Alkaline phosphatase-like, alpha/beta/alpha||BPG-independent PGAM, N-terminal||Phosphoglycerate mutase, 2,3-bisphosphoglycerate-independent||Alkaline-phosphatase-like, core domain
OS03G0331700	osa-miR159a.1,osa-miR159c,osa-miR159f	CML27	EF-Hand 1, calcium-binding site||EF-hand domain pair||EF-hand domain
OS03G0332100	osa-miR1436,osa-miR818a	CYP714B2	Cytochrome P450||Cytochrome P450, E-class, group I||Cytochrome P450, conserved site
OS03G0333100	osa-miR437	-	Bms1/Tsr1-type G domain||Ribosome biogenesis protein BMS1/TSR1, C-terminal||P-loop containing nucleoside triphosphate hydrolase
OS03G0333300	osa-miR437	-	Translation initiation factor IF2/IF5, zinc-binding||Translation initiation factor IF2/IF5, N-terminal||Translation initiation factor IF2/IF5
OS03G0334100	osa-miR5542	-	PRC-barrel-like
OS03G0335300	osa-miR1436,osa-miR818a	-	EGF-like calcium-binding domain||Thioredoxin-like fold||EGF-like calcium-binding, conserved site||Protease-associated domain, PA
OS03G0337500	novel_3	-	K+ potassium transporter
OS03G0339300	osa-miR1436,osa-miR1439	-	Plant peroxidase||Peroxidase, active site||Haem peroxidase||Peroxidases heam-ligand binding site||Haem peroxidase, plant/fungal/bacterial
OS03G0339900	osa-miR812o-5p,osa-miR812a,osa-miR812q,osa-miR6248	CIPK10	Serine/threonine-protein kinase, active site||Serine/threonine- / dual specificity protein kinase, catalytic domain||Protein kinase-like domain||Calcium/calmodulin-dependent/calcium-dependent protein kinase||Protein kinase domain||Protein kinase, ATP binding site||KA1 domain/Ssp2 C-terminal domain||NAF/FISL domain||NAF domain
OS03G0340001	osa-miR812a	-	Uroporphyrinogen decarboxylase (URO-D)
OS03G0340900	osa-miR5825	RSH1	Beta-grasp domain||-||RelA/SpoT||HD/PDEase domain
OS03G0343300	osa-miR1440b	-	Small-subunit processome, Utp14
OS03G0343400	novel_4	-	Rossmann-like alpha/beta/alpha sandwich fold||DNA photolyase, FAD-binding/Cryptochrome, C-terminal||DNA photolyase, N-terminal
OS03G0343700	osa-miR1436	-	Brix domain
OS03G0344300	osa-miR1439	-	Peptidase C48, SUMO/Sentrin/Ubl1
OS03G0344900	osa-miR437	-	ClpP/crotonase-like domain||Clp protease proteolytic subunit /Translocation-enhancing protein TepA
OS03G0346700	novel_3	-	JmjC domain||Zinc-finger domain of monoamine-oxidase A repressor R1||Zinc finger, RING-type
OS03G0347200	osa-miR437	ABH1	MIF4-like, type 1/2/3||Nuclear cap-binding protein subunit 1||Armadillo-type fold||MIF4G-like, type 3||MIF4G-like, type 2||MIF4G-like, type 1
OS03G0347500	osa-miR1436	SWEET12	SWEET sugar transporter, plants
OS03G0347900	osa-miR817,osa-miR5526	-	Terpene synthase, metal-binding domain||Terpenoid synthase||Terpenoid cyclases/protein prenyltransferase alpha-alpha toroid||Terpene synthase, N-terminal domain
OS03G0348200	osa-miR5788,osa-miR5799	-	Terpene synthase, metal-binding domain||Terpenoid synthase||Terpenoid cyclases/protein prenyltransferase alpha-alpha toroid||Terpene synthase, N-terminal domain
OS03G0348800	osa-miR1436	-	Alpha/Beta hydrolase fold
OS03G0350100	novel_4	-	NOP5, N-terminal||Nop domain
OS03G0352400	novel_3	NUG2	P-loop containing nucleoside triphosphate hydrolase||Circularly permuted (CP)-type guanine nucleotide-binding (G) domain||GTP-binding protein, orthogonal bundle domain||Nucleolar GTP-binding protein 2||Nucleolar GTP-binding protein 2, N-terminal domain||GTP binding domain
OS03G0353600	osa-miR5810	-	FMP27, C-terminal
OS03G0353900	osa-miR159a.2	-	Domain of unknown function DUF1785||Argonaute/Dicer protein, PAZ domain
OS03G0355600	osa-miR2865,osa-miR2905	-	Armadillo-type fold||Coatomer/clathrin adaptor appendage, Ig-like subdomain||AP-1, 2,4 complex subunit beta||Armadillo-like helical||AP complex subunit beta||Clathrin adaptor, beta-adaptin, appendage, Ig-like subdomain||Beta2-adaptin/TBP, C-terminal domain||Beta-adaptin appendage, C-terminal subdomain||Clathrin adaptor, alpha/beta/gamma-adaptin, appendage, Ig-like subdomain||Coatomer/calthrin ada…
OS03G0358000	osa-miR820a,osa-miR390-3p,osa-miR812o-5p,osa-miR812a	-	PWWP domain||CID domain
OS03G0361500	osa-miR1854-5p	-	Terpene synthase, N-terminal domain||Terpenoid cyclases/protein prenyltransferase alpha-alpha toroid
OS03G0362032	osa-miR2121a	-	Terpene synthase, N-terminal domain||Terpenoid cyclases/protein prenyltransferase alpha-alpha toroid
OS03G0362200	osa-miR1848	-	Armadillo-like helical||Armadillo-type fold
OS03G0363100	osa-miR1848	-	Armadillo-like helical||Armadillo-type fold
OS03G0363400	osa-miR812o-5p	-	Putative zinc- or iron-chelating domain containing protein
OS03G0363500	osa-miR818a,osa-miR6248	-	Major facilitator superfamily domain||Sugar/inositol transporter||Sugar transporter, conserved site||General substrate transporter
OS03G0364400	novel_3	-	Serine/threonine-protein kinase, active site||Protein kinase-like domain||Protein kinase, ATP binding site||Protein kinase domain||Serine-threonine/tyrosine-protein kinase catalytic domain
OS03G0365000	osa-miR1439,osa-miR3981-3p,osa-miR156b-3p,osa-miR1436,osa-miR5162	-	Lipase, GDSL||SGNH hydrolase-type esterase domain
OS03G0366350	osa-miR437,osa-miR5831,osa-miR5825	-	F-box associated interaction domain||F-box domain
OS03G0367000	osa-miR1436	-	Tetratricopeptide repeat-containing domain||Elongated TPR repeat-containing domain||Peptidyl-prolyl cis-trans isomerase, FKBP-type, domain||Tetratricopeptide-like helical||Peptidyl-prolyl cis-trans isomerase PASTICCINO1||Peptidyl-prolyl cis-trans isomerase, FKBP-type||Tetratricopeptide repeat||Tetratricopeptide TPR1
OS03G0369600	osa-miR812q,osa-miR812s,osa-miR812a,osa-miR5799,osa-miR6248,osa-miR812o-3p	-	Haem peroxidase||Plant peroxidase||Peroxidase, active site||Haem peroxidase, plant/fungal/bacterial||Peroxidases heam-ligand binding site
OS03G0371300	osa-miR812a,osa-miR812s	-	Cytochrome P450
OS03G0372700	osa-miR3979-5p	-	Low temperature viability protein
OS03G0374600	osa-miR814a	-	Glycoside hydrolase, superfamily||Glycoside hydrolase, catalytic domain||Glycoside hydrolase, family 17
OS03G0375300	osa-miR1426	-	Amino acid/polyamine transporter I
OS03G0377700	osa-miR156b-3p	CSLA5	Nucleotide-diphospho-sugar transferases
OS03G0381200	osa-miR5161	-	F-actin capping protein, beta subunit, conserved site||F-actin-capping protein subunit beta
OS03G0381300	osa-miR5149	-	HSP20-like chaperone||CS domain
OS03G0383900	osa-miR156b-3p	-	Heavy metal-associated domain, HMA
OS03G0388000	osa-miR417	-	Nucleotide-binding, alpha-beta plait||RNA recognition motif domain
OS03G0388900	osa-miR319a-3p	-	Peptidase C14, caspase domain||Caspase-like domain
OS03G0389000	novel_3	-	Caspase-like domain||Peptidase C14, caspase domain
OS03G0390400	osa-miR818a,osa-miR5162,osa-miR1436	-	Cytochrome c oxidase, subunit VIb
OS03G0393300	osa-miR5542	-	Alpha/Beta hydrolase fold||Peptidase S10, serine carboxypeptidase
OS03G0395900	osa-miR1436	-	Suppressor of white apricot N-terminal domain
OS03G0397300	osa-miR1436	-	Phosphoesterase domain||Metallo-dependent phosphatase-like
OS03G0399532	osa-miR1849,osa-miR1439	-	Chaperonin Cpn60/TCP-1||GroEL-like apical domain
OS03G0399800	osa-miR6249a	-	Mannose-binding lectin
OS03G0400700	osa-miR437	-	Late embryogenesis abundant protein, LEA-5
OS03G0401100	osa-miR5788	-	Protein kinase domain||Phox/Bem1p||Protein kinase, ATP binding site||Protein kinase-like domain
OS03G0401200	osa-miR159a.2	-	DnaJ domain||Domain of unknown function DUF3444
OS03G0402000	osa-miR5148a	-	Transport protein particle (TRAPP) component||TRAPP I complex, Bet3||NO signalling/Golgi transport ligand-binding domain
OS03G0403100	osa-miR1861n	-	DNA-directed RNA polymerase, subunit 2||RNA polymerase, beta subunit, conserved site||DNA-directed RNA polymerase, subunit 2, domain 6||RNA polymerase Rpb2, domain 2||RNA polymerase, beta subunit, protrusion||RNA polymerase Rpb2, domain 3||RNA polymerase Rpb2, domain 5||RNA polymerase Rpb2, domain 4||RNA polymerase Rpb2, domain 7||RNA polymerase Rpb2, OB-fold
OS03G0403600	osa-miR1436	-	von Willebrand factor, type A
OS03G0405500	osa-miR5799,osa-miR812o-5p,osa-miR437	-	Thioredoxin-like fold||Thioredoxin, conserved site||C1-like
OS03G0405900	osa-miR167h-3p	-	Thioredoxin-like fold||Thioredoxin, conserved site||C1-like
OS03G0406200	osa-miR1436,osa-miR1439	-	Translation elongation factor EF1B/ribosomal protein S6||Glutathione S-transferase, C-terminal-like||Translation elongation factor EF1B, beta/delta subunit, guanine nucleotide exchange||Translation elongation factor EF1B, beta/delta chains, conserved site
OS03G0406900	osa-miR1439,osa-miR1436	-	Organic solute transporter Ost-alpha
OS03G0407400	osa-miR5337a	-	G-protein gamma-like domain
OS03G0409100	osa-miR1436,osa-miR5824	-	PUA-like domain||Peptidase S16, lon N-terminal
OS03G0409400	osa-miR1439	-	Mob1/phocein
OS03G0411100	osa-miR169f.1,osa-miR169a,osa-miR169e,osa-miR169r-5p,osa-miR169h,osa-miR169b	-	CCAAT-binding factor, conserved site||CCAAT-binding transcription factor, subunit B
OS03G0411500	osa-miR5152-5p	-	ClpP, active site||Clp protease proteolytic subunit /Translocation-enhancing protein TepA||ClpP/crotonase-like domain
OS03G0412900	osa-miR1436,osa-miR818a	-	DEK, C-terminal
OS03G0413100	osa-miR529a,osa-miR1850.1	-	ACT domain
OS03G0415500	osa-miR5538	-	Mitochondrial inner membrane translocase subunit Tim17/Tim22/Tim23/peroxisomal protein PMP24||Mitochondrial inner membrane translocase complex, subunit Tim17
OS03G0416500	osa-miR396c-3p	-	Glucosamine/galactosamine-6-phosphate isomerase||6-phosphogluconolactonase, DevB-type
OS03G0422800	osa-miR5485	-	Concanavalin A-like lectin/glucanase, subgroup||S-receptor-like serine/threonine-protein kinase||Serine/threonine- / dual specificity protein kinase, catalytic domain||Serine/threonine-protein kinase, active site||Protein kinase-like domain||S-locus glycoprotein||Apple-like||Protein kinase domain||Protein kinase, ATP binding site||Epidermal growth factor-like domain||Bulb-type lectin domain
OS03G0424200	osa-miR5835	PUB57	ICP0-binding domain of Ubiquitin-specific protease 7||U box domain||Protein kinase-like domain||Protein kinase domain||Zinc finger, RING/FYVE/PHD-type||Serine-threonine/tyrosine-protein kinase catalytic domain||Tyrosine-protein kinase, active site
OS03G0425600	osa-miR5825	UGD1	UDP-glucose/GDP-mannose dehydrogenase, dimerisation||6-phosphogluconate dehydrogenase, C-terminal-like||NAD(P)-binding domain||UDP-glucose/GDP-mannose dehydrogenase, N-terminal||UDP-glucose/GDP-mannose dehydrogenase||UDP-glucose 6-dehydrogenase, eukaryotic type||UDP-glucose/GDP-mannose dehydrogenase, C-terminal
OS03G0427100	osa-miR2100-5p	-	Zinc finger, RING/FYVE/PHD-type||Zinc finger, RING-type||Zinc finger, RING-type, conserved site||RING-type zinc-finger, LisH dimerisation motif
OS03G0427300	osa-miR399j,osa-miR399d	GLUA3	11-S seed storage protein, plant||RmlC-like cupin domain||Cupin 1||11-S seed storage protein, conserved site||RmlC-like jelly roll fold
OS03G0427900	osa-miR5513	-	Ubiquitin conjugation factor E4, core||U box domain||Zinc finger, RING/FYVE/PHD-type
OS03G0429800	osa-miR815a	XDH	Aldehyde oxidase/xanthine dehydrogenase||2Fe-2S ferredoxin, iron-sulphur binding site||Molybdopterin dehydrogenase, FAD-binding||CO dehydrogenase flavoprotein, C-terminal||Aldehyde oxidase/xanthine dehydrogenase, molybdopterin binding||Aldehyde oxidase/xanthine dehydrogenase, a/b hammerhead||CO dehydrogenase flavoprotein-like, FAD-binding, subdomain 2||2Fe-2S ferredoxin-type domain||FAD-binding, …
OS03G0431200	osa-miR156a	-	GNAT domain||Acyl-CoA N-acyltransferase||Aspartate/glutamate/uridylate kinase||Amino-acid N-acetyltransferase (ArgA)
OS03G0431550	osa-miR2100-5p	-	Glycosyl transferase, family 20
OS03G0432200	osa-miR393b-3p	-	Hly-III-related
OS03G0433200	osa-miR1848	SHR2	Protein short-root||Transcription factor GRAS
OS03G0434800	osa-miR5154,osa-miR1439	-	Peroxidase, active site||Plant peroxidase||Haem peroxidase||Peroxidases heam-ligand binding site||Haem peroxidase, plant/fungal/bacterial
OS03G0435200	osa-miR5337a	-	Pentatricopeptide repeat||Tetratricopeptide-like helical
OS03G0435300	osa-miR1436,osa-miR5815,osa-miR818a	-	Armadillo-type fold||Armadillo-like helical
OS03G0437600	osa-miR1439,osa-miR812a,osa-miR812o-5p,osa-miR1436	D14L	Alpha/beta hydrolase fold-1||Alpha/Beta hydrolase fold
OS03G0439800	osa-miR5522,osa-miR812a	-	Zinc finger protein 706||Uncharacterised protein family SERF
OS03G0441000	osa-miR1442,osa-miR535-5p	-	Transcription initiation factor TFIID component TAF4||RST domain of plant C-terminal
OS03G0446200	osa-miR3979-5p	-	Chloramphenicol acetyltransferase-like domain
OS03G0448500	osa-miR812a,osa-miR812s,osa-miR812o-5p,osa-miR5799	-	Calcineurin B protein||EF-hand domain pair
OS03G0448600	osa-miR1425-3p	-	G-protein beta WD-40 repeat||WD40-repeat-containing domain||WD40 repeat||WD40/YVTN repeat-like-containing domain
OS03G0452300	osa-miR1862f,osa-miR1436,osa-miR2871a-3p,osa-miR814a	-	Ribosomal protein S5, bacterial-type||Ribosomal protein S5, N-terminal||Double-stranded RNA-binding domain||Ribosomal protein S5||Ribosomal protein S5, N-terminal, conserved site||Ribosomal protein S5 domain 2-type fold||Ribosomal protein S5 domain 2-type fold, subgroup||Ribosomal protein S5, C-terminal
OS03G0454100	osa-miR1436,osa-miR6248	-	TMS membrane protein/tumour differentially expressed protein
OS03G0562200	osa-miR5538	-	F-box domain
OS03G0563600	osa-miR812a,osa-miR812g	-	Haem peroxidase||Plant peroxidase||Peroxidase, active site||Haem peroxidase, plant/fungal/bacterial||Peroxidases heam-ligand binding site
OS03G0568400	osa-miR5508,osa-miR1436	-	Cytochrome P450, E-class, group I||Cytochrome P450
OS03G0571900	osa-miR2098-3p	-	Multi antimicrobial extrusion protein
OS03G0572900	osa-miR2905	-	Multi antimicrobial extrusion protein
OS03G0576200	osa-miR1439,osa-miR1436,osa-miR5162	HAK21	K+ potassium transporter
OS03G0578900	osa-miR159d,osa-miR159f,osa-miR159c,osa-miR159a.1	-	SANT/Myb domain||Myb domain
OS03G0579200	osa-miR812a	-	P-loop containing nucleoside triphosphate hydrolase
OS03G0583900	osa-miR5487	DCL2A	DNA/RNA helicase, DEAD/DEAH box type, N-terminal||Helicase, superfamily 1/2, ATP-binding domain||Argonaute/Dicer protein, PAZ domain||P-loop containing nucleoside triphosphate hydrolase||Double-stranded RNA-binding domain||Dicer dimerisation domain||Ribonuclease III domain||Helicase, C-terminal
OS03G0586800	osa-miR815a	-	Aminoacyl-tRNA synthetase, class II (D/K/N)||OB-fold nucleic acid binding domain, AA-tRNA synthetase-type||Aminoacyl-tRNA synthetase, class II||Nucleic acid-binding, OB-fold||Lysyl-tRNA synthetase, class II, C-terminal||Lysine-tRNA ligase, class II||Aminoacyl-tRNA synthetase, class II (D/K/N)-like
OS03G0590700	osa-miR164a,osa-miR164e	-	NADH dehydrogenase [ubiquinone] 1 alpha subcomplex assembly factor 3
OS03G0591600	osa-miR1439	-	Protein of unknown function DUF247, plant
OS03G0593200	osa-miR6248,osa-miR1436	-	Transporter-associated domain||Domain of unknown function DUF21||FAD-binding, type 2||CBS domain||CO dehydrogenase flavoprotein-like, FAD-binding, subdomain 2
OS03G0594100	osa-miR1436	-	Cytochrome P450||Cytochrome P450, E-class, group I||Cytochrome P450, conserved site
OS03G0597600	osa-miR1879,osa-miR1436	-	Nucleophile aminohydrolases, N-terminal||Peptidase T2, asparaginase 2
OS03G0598700	osa-miR1439,osa-miR5536	-	Zinc finger, RING-type||Zinc finger, RING/FYVE/PHD-type||Zinc finger, RING-H2-type
OS03G0601500	osa-miR5831,osa-miR437,osa-miR5825	-	NADH-ubiquinone reductase complex 1 MLRQ subunit
OS03G0603300	osa-miR1436	-	Transcription factor TFIID, subunit 8, C-terminal
OS03G0604200	osa-miR164a	UGD2	NAD(P)-binding domain||UDP-glucose/GDP-mannose dehydrogenase, dimerisation||6-phosphogluconate dehydrogenase, C-terminal-like||UDP-glucose/GDP-mannose dehydrogenase, C-terminal||UDP-glucose 6-dehydrogenase, eukaryotic type||UDP-glucose/GDP-mannose dehydrogenase||UDP-glucose/GDP-mannose dehydrogenase, N-terminal
OS03G0606100	osa-miR2103	-	Protein of unknown function DUF620
OS03G0607600	osa-miR166l-5p	-	Cyclin A, plant||Cyclin, N-terminal||Cyclin, C-terminal domain
OS03G0608600	osa-miR6248	-	Trypsin-like cysteine/serine peptidase domain
OS03G0610800	osa-miR6248,osa-miR5801,osa-miR5808,osa-miR2090	-	Serpin, conserved site||Serpin domain||Serpin family
OS03G0611700	osa-miR2098-5p	-	Nucleic acid-binding, OB-fold
OS03G0612400	osa-miR1441	-	Lateral organ boundaries, LOB
OS03G0616300	osa-miR172d-5p,osa-miR166a-5p	-	DNA polymerase IV||DNA-repair protein, UmuC-like||DNA polymerase, Y-family, little finger domain
OS03G0619400	osa-miR1436	-	T-complex protein 1, beta subunit||TCP-1-like chaperonin intermediate domain||Chaperonin Cpn60/TCP-1||Chaperonin TCP-1, conserved site||Chaperone tailless complex polypeptide 1 (TCP-1)||GroEL-like equatorial domain||GroEL-like apical domain
OS03G0619600	osa-miR5542,osa-miR1436	-	DNA-binding pseudobarrel domain||B3 DNA binding domain
OS03G0619800	osa-miR1436	-	B3 DNA binding domain||DNA-binding pseudobarrel domain
OS03G0620500	osa-miR1439	-	B3 DNA binding domain||DNA-binding pseudobarrel domain
OS03G0621400	osa-miR172d-5p	-	Ankyrin repeat-containing domain||Tetratricopeptide-like helical||Ankyrin repeat||Tetratricopeptide repeat||Tetratricopeptide repeat-containing domain
OS03G0621900	osa-miR818a	-	DNA-binding pseudobarrel domain||B3 DNA binding domain
OS03G0624800	osa-miR5788,osa-miR1862e	-	Pentatricopeptide repeat||Tetratricopeptide-like helical
OS03G0625933	osa-miR5337a,osa-miR156a	-	Zinc finger, RING/FYVE/PHD-type||Zinc finger, RING-type||Zinc finger, C6HC-type||E3 ubiquitin ligase RBR family
OS03G0626100	osa-miR1436	-	Zinc finger, RING-type||Zinc finger, RING/FYVE/PHD-type||Zinc finger, C6HC-type||E3 ubiquitin ligase RBR family
OS03G0628800	osa-miR5526	-	Zeta toxin domain||P-loop containing nucleoside triphosphate hydrolase
OS03G0632800	osa-miR1436	-	Zinc finger, C3HC4 RING-type||Zinc finger, RING/FYVE/PHD-type||Zinc finger, RING-type||Zinc finger, RING-type, conserved site
OS03G0633500	osa-miR1439,osa-miR1436	-	Phox/Bem1p||AUX/IAA protein
OS03G0636800	osa-miR5532	NEK1	Protein kinase domain||Protein kinase, ATP binding site||Serine/threonine- / dual specificity protein kinase, catalytic domain||Serine/threonine-protein kinase, active site||Protein kinase-like domain
OS03G0639700	osa-miR1439,osa-miR1436	-	P-loop containing nucleoside triphosphate hydrolase||DNA recombination and repair protein RecA||DNA recombination/repair protein RecA, monomer-monomer interface||DNA recombination/repair protein RecA, conserved site||AAA+ ATPase domain||DNA recombination/repair protein RecA/RadB, ATP-binding domain||DNA recombination and repair protein RecA, C-terminal
OS03G0640000	osa-miR1848	-	Patatin/Phospholipase A2-related||Acyl transferase/acyl hydrolase/lysophospholipase
OS03G0640100	osa-miR1436,osa-miR1439	MSI1	Histone-binding protein RBBP4, N-terminal||G-protein beta WD-40 repeat||WD40 repeat||WD40/YVTN repeat-like-containing domain||WD40-repeat-containing domain||WD40 repeat, conserved site
OS03G0642600	osa-miR5799	-	Protein kinase domain||Protein kinase-like domain||Serine/threonine- / dual specificity protein kinase, catalytic domain||Serine/threonine-protein kinase, active site||Wall-associated receptor kinase galacturonan-binding domain||Protein kinase, ATP binding site
OS03G0644000	osa-miR1436	-	Beclin family
OS03G0645200	osa-miR1436	-	Initiation factor 2B-related
OS03G0646100	osa-miR172b	-	Cell division protein FtsZ||Tubulin/FtsZ, GTPase domain||Cell division protein FtsZ, C-terminal||Tubulin/FtsZ, 2-layer sandwich domain||Tubulin/FtsZ, C-terminal||Cell division protein FtsZ, conserved site
OS03G0646300	osa-miR5794	-	Ion transport domain||IQ motif, EF-hand binding site||Cyclic nucleotide-binding-like||Potassium channel, voltage-dependent, EAG/ELK/ERG||RmlC-like jelly roll fold||Cyclic nucleotide-binding domain
OS03G0647600	osa-miR169r-5p,osa-miR169h,osa-miR169n,osa-miR169f.1,osa-miR169a	-	CCAAT-binding transcription factor, subunit B
OS03G0648100	osa-miR5817	-	Glycosyl transferase, family 14
OS03G0648400	osa-miR1436	-	Heat shock protein DnaJ, cysteine-rich domain||HSP40/DnaJ peptide-binding||Chaperone DnaJ||DnaJ domain||Chaperone DnaJ, C-terminal||DnaJ domain, conserved site
OS03G0650000	osa-miR2876-3p,osa-miR1436	YAB2	High mobility group box domain||YABBY protein
OS03G0650200	osa-miR6249a	-	Cytochrome P450
OS03G0650700	osa-miR3979-3p	-	Ribosomal protein S5 domain 2-type fold||Ribosomal protein S5 domain 2-type fold, subgroup||Elongation factor, GTP-binding domain||Translation protein, beta-barrel domain||Translation elongation factor EFG, V domain||Elongation factor G, III-V domain||P-loop containing nucleoside triphosphate hydrolase
OS03G0652100	osa-miR1436,osa-miR5337a	-	CCR4-NOT complex, subunit 3/ 5||CCR4-Not complex component, Not N-terminal domain||NOT2/NOT3/NOT5
OS03G0654400	osa-miR1436	-	Amino acid/polyamine transporter I||Cationic amino acid transporter, C-terminal
OS03G0655700	osa-miR814a	-	Isopropylmalate dehydrogenase-like domain||Isocitrate/isopropylmalate dehydrogenase, conserved site||Isocitrate and isopropylmalate dehydrogenases family||Isopropylmalate dehydrogenase
OS03G0656900	osa-miR818a,osa-miR1436	-	NusB antitermination factor||NusB/RsmB/TIM44
OS03G0657000	osa-miR5542	TBP2	TATA-box binding protein, conserved site||TATA-box binding protein||Beta2-adaptin/TBP, C-terminal domain
OS03G0659300	osa-miR162a	-	Glyoxalase-like domain||Glyoxalase/Bleomycin resistance protein/Dihydroxybiphenyl dioxygenase
OS03G0659400	osa-miR6248	-	Zinc knuckle CX2CX3GHX4C||Zinc finger, CCHC-type||Zinc finger, RING/FYVE/PHD-type||DWNN domain
OS03G0661800	osa-miR166a-5p	-	Trypsin-like cysteine/serine peptidase domain||PDZ domain
OS03G0663100	osa-miR5155	-	Trypsin-like cysteine/serine peptidase domain||PDZ domain
OS03G0663700	osa-miR156a	-	Endonuclease/exonuclease/phosphatase
OS03G0664700	osa-miR5833	-	RNA polymerase II accessory factor, Cdc73||Cell division control protein 73, C-terminal
OS03G0667100	osa-miR1850.1	-	Ankyrin repeat-containing domain||NPR1/NIM1-like, C-terminal||Ankyrin repeat||BTB/POZ fold||Domain of unknown function DUF3420
OS03G0667500	osa-miR2121a	IRT1	Zinc/iron permease, fungal/plant||Zinc/iron permease
OS03G0669200	osa-miR1436,osa-miR1439	RGB1	G-protein, beta subunit||G-protein beta WD-40 repeat||WD40-repeat-containing domain||WD40/YVTN repeat-like-containing domain||WD40 repeat||WD40 repeat, conserved site||Guanine nucleotide-binding protein, beta subunit
OS03G0669900	novel_3	-	F-box domain
OS03G0671800	osa-miR812g,osa-miR812p,osa-miR812f,osa-miR1436	-	Myc-type, basic helix-loop-helix (bHLH) domain
OS03G0674700	osa-miR396e-5p,osa-miR396g,osa-miR396f-5p	GRF9	Growth-regulating factor||-||Glutamine-Leucine-Glutamine, QLQ
OS03G0679700	osa-miR1442	-	Thiamine biosynthesis protein ThiC
OS03G0679800	osa-miR2905,osa-miR5810	-	Ankyrin repeat-containing domain||Tetratricopeptide-like helical||Tetratricopeptide repeat||Ankyrin repeat||Tetratricopeptide TPR2||Tetratricopeptide repeat-containing domain
OS03G0680200	osa-miR172a	-	Tetratricopeptide repeat||Ankyrin repeat||Tetratricopeptide TPR2||Tetratricopeptide repeat-containing domain||Ankyrin repeat-containing domain||Tetratricopeptide-like helical
OS03G0680300	osa-miR1436	-	Tetratricopeptide-like helical||Ankyrin repeat-containing domain||Tetratricopeptide TPR2||Tetratricopeptide repeat-containing domain||Ankyrin repeat||Tetratricopeptide repeat
OS03G0680566	osa-miR390-3p,osa-miR5825,osa-miR1436	-	Tetratricopeptide TPR1||Tetratricopeptide-like helical||Ankyrin repeat-containing domain||Tetratricopeptide repeat-containing domain||Ankyrin repeat||Tetratricopeptide repeat
OS03G0680800	osa-miR5490	-	Homeobox KN domain||POX domain||Homeobox domain
OS03G0685300	osa-miR812a,osa-miR1862f	-	Glutamine amidotransferase||Class I glutamine amidotransferase-like
OS03G0685500	osa-miR5532	-	Cysteine alpha-hairpin motif superfamily
OS03G0686300	osa-miR1857-5p	-	Myosin, N-terminal, SH3-like||IQ motif, EF-hand binding site||P-loop containing nucleoside triphosphate hydrolase||Myosin head, motor domain
OS03G0689100	osa-miR1436	-	Histidine phosphatase superfamily, clade-2||Histidine phosphatase superfamily
OS03G0689300	osa-miR818a	-	P-type ATPase, cytoplasmic domain N||P-type ATPase, A domain||H+ transporting P-type ATPase, subfamily IIIA||HAD-like domain||P-type ATPase, transmembrane domain||Cation-transporting P-type ATPase, N-terminal||Cation-transporting P-type ATPase||P-type ATPase, phosphorylation site
OS03G0692700	osa-miR3979-5p	-	Protein of unknown function DUF538
OS03G0694500	osa-miR5799	-	Xanthine/uracil/vitamin C permease||Nucleobase-ascorbate transporter 4-related
OS03G0694700	osa-miR1439	-	Ribosomal protein S21
OS03G0694900	osa-miR6248	-	Valyl/Leucyl/Isoleucyl-tRNA synthetase, class I, anticodon-binding||Rossmann-like alpha/beta/alpha sandwich fold||Valyl/Leucyl/Isoleucyl-tRNA synthetase, editing domain||Valyl-tRNA synthetase, tRNA-binding arm||Valine-tRNA ligase||Aminoacyl-tRNA synthetase, class I, conserved site||Aminoacyl-tRNA synthetase, class Ia||Aminoacyl-tRNA synthetase, class 1a, anticodon-binding
OS03G0696300	osa-miR169n,osa-miR169b,osa-miR169h,osa-miR169r-5p,osa-miR169e,osa-miR169a,osa-miR169f.1	-	CCAAT-binding factor, conserved site||CCAAT-binding transcription factor, subunit B
OS03G0698350	osa-miR1848	-	UbiB domain||Protein kinase-like domain
OS03G0700800	osa-miR1852	-	Natural resistance-associated macrophage like
OS03G0701000	osa-miR2873b	-	Armadillo-like helical||Armadillo-type fold||HEAT, type 2
OS03G0703100	osa-miR1436	BGLU8	Glycoside hydrolase, catalytic domain||Glycoside hydrolase, superfamily||Glycoside hydrolase, family 1
OS03G0703200	osa-miR156l-5p	-	Leucine-rich repeat-containing N-terminal, type 2
OS03G0704200	osa-miR2876-3p	-	Zinc finger, MYND-type
OS03G0708700	osa-miR1440b	-	Zein-binding domain
OS03G0708900	osa-miR5522,osa-miR818a,osa-miR1436	-	Zinc finger, RanBP2-type
OS03G0709100	osa-miR408-3p	-	Plastocyanin-like
OS03G0709300	osa-miR408-3p	-	Plastocyanin-like||Blue (type 1) copper protein, binding site
OS03G0710100	osa-miR169n,osa-miR6248	-	Tat binding protein 1-interacting||Protein kinase domain||Winged helix-turn-helix DNA-binding domain||Protein kinase-like domain||Serine/threonine- / dual specificity protein kinase, catalytic domain||Serine/threonine-protein kinase, active site
OS03G0710700	osa-miR2103	-	Glycolipid transfer protein domain
OS03G0710800	osa-miR2100-5p	GF14F	14-3-3 domain||14-3-3 protein||14-3-3 protein, conserved site
OS03G0711200	osa-miR1436	-	Phosphatidylinositol 3/4-kinase, conserved site||Phosphoinositide 3-kinase, accessory (PIK) domain||Protein kinase-like domain||Phosphatidylinositol Kinase||Armadillo-type fold||Phosphatidylinositol 3-/4-kinase, catalytic domain
OS03G0711300	osa-miR1436	-	Protein kinase domain||Calcium/calmodulin-dependent/calcium-dependent protein kinase||Serine/threonine-protein kinase, active site||Serine/threonine- / dual specificity protein kinase, catalytic domain||Protein kinase-like domain||Protein kinase, ATP binding site
OS03G0711600	novel_3	-	AT hook-like||High mobility group protein HMGA, plant||AT hook, DNA-binding motif||Winged helix-turn-helix DNA-binding domain||Linker histone H1/H5, domain H15
OS03G0711700	osa-miR1439	-	DNA-directed RNA polymerase, subunit C11/M/9||Zinc finger, TFIIS-type
OS03G0711800	osa-miR5804	-	AGC-kinase, C-terminal||Serine/threonine- / dual specificity protein kinase, catalytic domain||Protein kinase-like domain||Serine/threonine-protein kinase, active site||Protein kinase domain
OS03G0713000	osa-miR1854-5p,osa-miR812a	-	Threonine dehydratase, C-terminal regulatory domain||Tryptophan synthase beta subunit-like PLP-dependent enzymes superfamily||Serine/threonine dehydratase, pyridoxal-phosphate-binding site||Threonine dehydratase, biosynthetic
OS03G0713500	osa-miR2905	-	Protein kinase domain||Serine/threonine- / dual specificity protein kinase, catalytic domain||Protein kinase-like domain||Serine/threonine-protein kinase, active site||Protein kinase, ATP binding site
OS03G0714400	osa-miR812g,osa-miR812f	-	Uncharacterised protein family, ATP binding||P-loop containing nucleoside triphosphate hydrolase||GPN-loop GTPase 3
OS03G0715400	novel_3,osa-miR1436,osa-miR1439	-	Membrane protein,Tapt1/CMV receptor
OS03G0717200	novel_3,osa-miR1848	-	Cytochrome b561/ferric reductase transmembrane||Cytochrome b561, eukaryote
OS03G0717700	novel_3	-	Signal transduction histidine kinase EnvZ-like, dimerisation/phosphoacceptor domain||Signal transduction response regulator, receiver domain||CheY-like superfamily||Histidine kinase-like ATPase, ATP-binding domain||Signal transduction histidine kinase-related protein, C-terminal||Signal transduction histidine kinase, core
OS03G0718800	osa-miR5819	-	Bifunctional inhibitor/plant lipid transfer protein/seed storage helical domain||Hydrophobic seed protein
OS03G0719000	osa-miR1426	-	Microtubule-associated protein, MAP65/Ase1/PRC1
OS03G0719300	osa-miR6248,osa-miR812o-5p,osa-miR812q,osa-miR812s,osa-miR812a	-	Dihydroxyacetone kinase||Dak kinase||DhaL domain
OS03G0719800	osa-miR172d-5p	PHYA	Phytochrome A/B/C/D/E||Signal transduction histidine kinase EnvZ-like, dimerisation/phosphoacceptor domain||GAF domain-like||Signal transduction histidine kinase, core||Phytochrome chromophore binding site||Histidine kinase-like ATPase, ATP-binding domain||GAF domain||Phytochrome, central region||PAS fold||Phytochrome chromophore attachment domain||PAS fold-2||-||PAS domain
OS03G0719850	osa-miR390-5p,osa-miR2880	-	Protein kinase, ATP binding site||Protein kinase-like domain||Protein kinase domain||Tyrosine-protein kinase, catalytic domain||Serine-threonine/tyrosine-protein kinase catalytic domain
OS03G0720300	osa-miR1436,osa-miR5825,osa-miR437	-	Glutamate decarboxylase||Pyridoxal phosphate-dependent transferase||Pyridoxal phosphate-dependent transferase, major region, subdomain 1||Pyridoxal phosphate-dependent decarboxylase
OS03G0720400	osa-miR6249a	-	Protein of unknown function DUF295||F-box domain
OS03G0721200	osa-miR5151	-	Proteasome component ECM29/Translational activator GCN1||Armadillo-like helical||Armadillo-type fold||HEAT, type 2
OS03G0725000	osa-miR814a	-	Ribosomal protein L6, conserved site||Ribosomal protein L6, alpha-beta domain||Ribosomal protein L6, bacterial-type||Ribosomal protein L6
OS03G0726300	osa-miR1320-5p	-	Domain of unknown function DUF221
OS03G0727200	osa-miR5815	-	Homeobox KN domain||Homeobox domain
OS03G0727900	novel_3	-	GTPase HflX||GTP binding domain||HflX-type guanine nucleotide-binding (G) domain||GTPase HflX N-terminal domain||P-loop containing nucleoside triphosphate hydrolase
OS03G0728100	osa-miR1436	-	DnaJ domain
OS03G0728500	osa-miR1436	-	SMAD/FHA domain||Forkhead-associated (FHA) domain
OS03G0729500	osa-miR396e-5p,osa-miR396g	GRF6	-||Growth-regulating factor||Glutamine-Leucine-Glutamine, QLQ
OS03G0729700	osa-miR1862f	-	Ribosomal RNA small subunit methyltransferase E||tRNA (guanine-N1-)-methyltransferase, N-terminal||Alpha/beta knot methyltransferases||PUA-like domain
OS03G0730400	osa-miR3981-5p,osa-miR3981-3p,osa-miR2121a	-	Peptidase S10, serine carboxypeptidase||Alpha/Beta hydrolase fold
OS03G0730700	osa-miR417,osa-miR1436	-	Peptidase S10, serine carboxypeptidase||Alpha/Beta hydrolase fold
OS03G0730800	osa-miR1440b,osa-miR817,osa-miR2121a,osa-miR1436	-	P-type ATPase, transmembrane domain||Cation-transporting P-type ATPase, N-terminal||P-type ATPase, cytoplasmic domain N||P-type ATPase, A domain||Cation-transporting P-type ATPase||HAD-like domain||P-type ATPase, phosphorylation site
OS03G0732000	osa-miR5337a,osa-miR1846e	-	LytB protein
OS03G0732100	osa-miR5788	-	Homeobox KN domain||POX domain||Homeobox domain
OS03G0735000	osa-miR5817	-	Nucleotidyl transferase||Trimeric LpxA-like||ADP-glucose pyrophosphorylase, conserved site||Nucleotide-diphospho-sugar transferases||Glucose-1-phosphate adenylyltransferase
OS03G0737600	osa-miR810a	CYCH1-1	Cyclin, N-terminal||Cyclin C/H/T/L||-
OS03G0738000	osa-miR6248	-	WD40 repeat||WD40/YVTN repeat-like-containing domain||WD40-repeat-containing domain
OS03G0740700	osa-miR2121a	-	HIT-like domain||Cwf19-like protein, C-terminal domain-2||Cwf19-like, C-terminal domain-1
OS03G0743200	osa-miR1848	-	Pentatricopeptide repeat
OS03G0743800	osa-miR1436,osa-miR814a	-	Immunoglobulin E-set||Helicase, C-terminal||Sec63 domain||DNA/RNA helicase, DEAD/DEAH box type, N-terminal||P-loop containing nucleoside triphosphate hydrolase||C2 domain||Helicase, superfamily 1/2, ATP-binding domain
OS03G0743900	osa-miR395c,osa-miR395a,osa-miR395w,osa-miR395b,osa-miR395f,osa-miR395o	-	PUA-like domain||ATP-sulfurylase PUA-like domain||Sulphate adenylyltransferase catalytic domain||Rossmann-like alpha/beta/alpha sandwich fold||Sulphate adenylyltransferase
OS03G0745700	osa-miR5825	-	Serine/threonine- / dual specificity protein kinase, catalytic domain||Serine/threonine-protein kinase, active site||Protein kinase-like domain||Protein kinase domain||Serine-threonine/tyrosine-protein kinase catalytic domain
OS03G0746500	osa-miR1436	SUV3	Helicase, C-terminal||Mitochondrial degradasome RNA helicase subunit, C-terminal domain||P-loop containing nucleoside triphosphate hydrolase
OS03G0747800	osa-miR818a,osa-miR1436	RCS3	Cysteine synthase K/M||Tryptophan synthase beta subunit-like PLP-dependent enzymes superfamily||Cysteine synthase/cystathionine beta-synthase P-phosphate-binding site||Cysteine synthase A
OS03G0747900	osa-miR818a,osa-miR1436	-	Myosin, N-terminal, SH3-like||IQ motif, EF-hand binding site||Myosin head, motor domain||P-loop containing nucleoside triphosphate hydrolase
OS03G0748800	osa-miR156f-3p	-	DNA/RNA helicase, DEAD/DEAH box type, N-terminal||P-loop containing nucleoside triphosphate hydrolase||Double-stranded RNA-binding domain||Helicase, superfamily 1/2, ATP-binding domain||Helicase, C-terminal||Helicase-associated domain||Domain of unknown function DUF1605
OS03G0750000	osa-miR1847.1	-	Rossmann-like alpha/beta/alpha sandwich fold
OS03G0752800	osa-miR5831	-	Transcription factor, MADS-box
OS03G0754800	osa-miR1852	-	Mitochondrial carrier protein||Mitochondrial substrate/solute carrier||Mitochondrial carrier domain
OS03G0755000	osa-miR1436	-	Protein kinase domain||Protein kinase-like domain||Serine/threonine- / dual specificity protein kinase, catalytic domain||Protein kinase, ATP binding site
OS03G0756400	osa-miR6248	-	Uncharacterised protein family, transmembrane-40
OS03G0756800	osa-miR5825,osa-miR1442	-	Uncharacterised protein family UPF0139
OS03G0757000	osa-miR820a,osa-miR1846a-3p	-	UDP-glucuronosyl/UDP-glucosyltransferase
OS03G0757200	osa-miR1846a-3p,osa-miR820a	-	UDP-glucuronosyl/UDP-glucosyltransferase
OS03G0757500	osa-miR6248	-	UDP-glucuronosyl/UDP-glucosyltransferase
OS03G0758300	novel_3	-	Cyclic nucleotide-binding-like||Ion transport domain||RmlC-like jelly roll fold||Cyclic nucleotide-binding domain
OS03G0758700	osa-miR166a-5p	-	WD40/YVTN repeat-like-containing domain||WD40-repeat-containing domain
OS03G0758950	osa-miR818a,osa-miR1436	-	DNA-binding WRKY
OS03G0759700	osa-miR5794,osa-miR1441	-	Myc-type, basic helix-loop-helix (bHLH) domain
OS03G0764450	osa-miR1436,osa-miR5788	-	SWIB/MDM2 domain||SWIB domain
OS03G0769800	novel_3	-	Homeobox domain
OS03G0772100	osa-miR1436,osa-miR1439	-	Homeobox, conserved site||Homeobox domain||Homeobox KN domain
OS03G0773800	osa-miR444a-3p.1	-	NAD(P)-binding domain||Lactate/malate dehydrogenase, N-terminal||Lactate dehydrogenase/glycoside hydrolase, family 4, C-terminal||Malate dehydrogenase, active site||Lactate/malate dehydrogenase, C-terminal||Malate dehydrogenase, type 1||L-lactate/malate dehydrogenase
OS03G0775400	osa-miR1848	-	Tetratricopeptide-like helical||Pentatricopeptide repeat
OS03G0775500	osa-miR437	-	Domain of unknown function DUF59
OS03G0776000	osa-miR1425-5p	-	Phosphoglucose isomerase, C-terminal||Phosphoglucose isomerase (PGI)||Phosphoglucose isomerase, conserved site
OS03G0777600	osa-miR818a	-	Nucleotide-diphospho-sugar transferases||Glycosyl transferase, family 8
OS03G0778000	osa-miR1436	-	Calmodulin binding protein-like
OS03G0783800	osa-miR159c	-	Protein of unknown function DUF295
OS03G0784000	osa-miR172a,osa-miR172b	-	Amine oxidase
OS03G0784400	osa-miR5147	-	Endoplasmic reticulum vesicle transporter, C-terminal
OS03G0784800	osa-miR6248	-	Armadillo-type fold
OS03G0785800	osa-miR319a-3p.2-3p,osa-miR1850.1	PCF6	Transcription factor TCP subgroup||Transcription factor, TCP
OS03G0786400	novel_3	-	Zinc finger, C2H2
OS03G0786900	osa-miR1436,osa-miR1439	-	TRAPP III complex, Trs85||TRAPP II complex, Trs120||Tetratricopeptide-like helical
OS03G0789466	osa-miR5819	-	Ribonuclease H-like domain||Stem cell self-renewal protein Piwi||Argonaute/Dicer protein, PAZ domain||Domain of unknown function DUF1785
OS03G0790600	osa-miR6248,osa-miR1876	-	Transferrin receptor-like, dimerisation domain||Peptidase M28
OS03G0790900	osa-miR1436	-	2Fe-2S ferredoxin-type domain||CO dehydrogenase flavoprotein-like, FAD-binding, subdomain 2||Aldehyde oxidase/xanthine dehydrogenase, molybdopterin binding||Aldehyde oxidase/xanthine dehydrogenase, a/b hammerhead||CO dehydrogenase flavoprotein, C-terminal||Molybdopterin dehydrogenase, FAD-binding||2Fe-2S ferredoxin, iron-sulphur binding site||Aldehyde oxidase/xanthine dehydrogenase||Beta-grasp do…
OS03G0792500	osa-miR2873b	-	BTB/POZ fold
OS03G0793500	osa-miR5161	-	Protein kinase domain||Protein kinase, ATP binding site||Serine/threonine- / dual specificity protein kinase, catalytic domain||Serine/threonine-protein kinase, active site||Protein kinase-like domain
OS03G0794800	osa-miR1439,osa-miR3981-5p,osa-miR818a,osa-miR1436	-	Zinc finger, CCHC-type||Putative 5-3 exonuclease||5'-3' exoribonuclease
OS03G0795000	osa-miR812s,osa-miR812a,osa-miR812o-3p	-	Biopterin transport-related protein BT1||Major facilitator superfamily domain
OS03G0796501	osa-miR3982-5p	-	Ribosomal protein L4/L1e||Ribosomal protein L4/L1e, eukaryotic/archaeal, conserved site||Ribosomal protein L4 domain||60S ribosomal protein L4, C-terminal domain
OS03G0796600	osa-miR1440b	-	Protein of unknown function DUF506, plant
OS03G0797000	osa-miR167a-3p	-	Tryptophan synthase, alpha chain||Tryptophan synthase, alpha chain, active site||Aldolase-type TIM barrel||Ribulose-phosphate binding barrel
OS03G0798200	osa-miR399d,osa-miR399j	-	Zinc finger, RING-type||Zinc finger, RING/FYVE/PHD-type||Zinc finger, RING-type, conserved site||Zinc finger, C3HC4 RING-type
OS03G0799700	osa-miR160a-3p	-	GTP-binding protein Obg/CgtA||P-loop containing nucleoside triphosphate hydrolase||GTP binding domain||GTP1/OBG domain||OBG-type guanine nucleotide-binding (G) domain||GTP1/OBG, conserved site||Small GTP-binding protein domain
OS03G0800800	novel_3	-	SMAD/FHA domain||Forkhead-associated (FHA) domain||Microspherule protein, N-terminal domain
OS03G0801800	osa-miR437,novel_3	-	Nucleotide-binding, alpha-beta plait||RNA recognition motif domain||RNA recognition motif domain, eukaryote
OS03G0801900	osa-miR1862e,osa-miR1862d	-	Actin cross-linking||Protein of unknown function DUF569
OS03G0804300	osa-miR1862d,osa-miR1862e	-	Zinc finger, DHHC-type, palmitoyltransferase
OS03G0805100	osa-miR6248	-	Squalene/phytoene synthase||Terpenoid synthase||Squalene/phytoene synthase, conserved site||Farnesyl-diphosphate farnesyltransferase
OS03G0806300	osa-miR818a	-	Rieske [2Fe-2S] iron-sulphur domain||Pheophorbide a oxygenase
OS03G0807100	osa-miR1862f	-	Domain of unknown function DUF4409||Domain of unknown function DUF239
OS03G0807400	osa-miR812o-5p,osa-miR1439,osa-miR812a	-	Pentatricopeptide repeat||Tetratricopeptide-like helical
OS03G0807600	osa-miR1439	-	Methyltransferase type 11||SAM-dependent methyltransferase SMT-type||S-adenosyl-L-methionine-dependent methyltransferase-like||Sterol methyltransferase C-terminal
OS03G0808000	osa-miR5147	-	Pectin lyase fold||Pectin lyase fold/virulence factor||Glycoside hydrolase, family 28||Parallel beta-helix repeat
OS03G0808100	osa-miR6249a	CESA2	Nucleotide-diphospho-sugar transferases||Cellulose synthase, RING-type zinc finger||Cellulose synthase||Zinc finger, RING/FYVE/PHD-type
OS03G0808900	osa-miR437	-	Glycoside hydrolase, superfamily||Glycosyl hydrolases 36||Aldolase-type TIM barrel
OS03G0811900	osa-miR5513	-	Small GTPase superfamily, SAR1-type||Small GTP-binding protein domain||Small GTPase superfamily, ARF/SAR type||Small GTPase superfamily, ARF type||Small GTPase superfamily, Rab type||P-loop containing nucleoside triphosphate hydrolase
OS03G0812000	osa-miR1436	-	DNA topoisomerase, type IIA-like domain||DNA gyrase/topoisomerase IV, subunit A, C-terminal beta-pinwheel||Type IIA DNA topoisomerase subunit A, alpha-helical domain
OS03G0812400	osa-miR1432-5p	-	EF-hand domain pair||EF-hand domain||EF-Hand 1, calcium-binding site
OS03G0812800	osa-miR1432-5p	-	EF-Hand 1, calcium-binding site||EF-hand domain pair||EF-hand domain
OS03G0815800	osa-miR1427	-	DNA-binding domain||AP2/ERF domain
OS03G0817100	novel_3	-	Uncharacterised protein family UPF0497, trans-membrane plant
OS03G0817500	osa-miR818a	-	PMR5 N-terminal domain||Trichome birefringence-like family||Protein trichome birefringence-like 34/35
OS03G0818800	osa-miR172a,osa-miR172b,osa-miR172c	-	AP2/ERF domain||DNA-binding domain||AP2-like ethylene-responsive transcription factor
OS03G0819400	osa-miR1436	-	Heavy metal-associated domain, HMA
OS03G0820600	osa-miR393a	ADF4	ADF-H/Gelsolin-like domain||Actin-binding, cofilin/tropomyosin type||-
OS03G0821700	osa-miR818a	-	Pentatricopeptide repeat
OS03G0822900	osa-miR6245	-	Ribonuclease H-like domain||Zinc finger, BED-type predicted||HAT dimerisation domain, C-terminal||Domain of unknown function DUF659
OS03G0823100	osa-miR166c-5p	-	Major facilitator superfamily domain||General substrate transporter||Sugar/inositol transporter
OS03G0825600	novel_3	-	Domain of unknown function DUF641, plant
OS03G0826700	osa-miR1436,osa-miR818a	-	S-adenosyl-L-methionine-dependent methyltransferase-like||Nicotinamide N-methyltransferase-like
OS03G0827600	osa-miR1436,osa-miR5788	-	Organic solute transporter Ost-alpha
OS03G0827700	osa-miR417	-	RNA helicase, DEAD-box type, Q motif||Helicase, superfamily 1/2, ATP-binding domain||P-loop containing nucleoside triphosphate hydrolase||DNA/RNA helicase, DEAD/DEAH box type, N-terminal||Zinc finger, CCHC-type||Helicase, C-terminal
OS03G0830200	novel_4	-	Uncharacterised protein family Cys-rich
OS03G0831700	osa-miR1436	-	Domain of unknown function DUF4378
OS03G0832600	osa-miR437	-	Ribosomal protein S5 domain 2-type fold, subgroup||GHMP kinase, C-terminal domain||GHMP kinase, ATP-binding, conserved site||Ribosomal protein S5 domain 2-type fold||Galactokinase galactose-binding domain||Galactokinase, conserved site||GHMP kinase N-terminal domain
OS03G0833100	novel_3	-	Short-chain dehydrogenase/reductase SDR||Glucose/ribitol dehydrogenase||NAD(P)-binding domain
OS03G0833300	osa-miR1436	SPL6	Transcription factor, SBP-box||Ankyrin repeat-containing domain
OS03G0834000	osa-miR1436	FEN-1B	Helix-hairpin-helix motif, class 2||XPG N-terminal||XPG/Rad2 endonuclease||5'-3' exonuclease, C-terminal domain||XPG conserved site||5'-3' exonuclease, N-terminal||Flap structure-specific endonuclease||PIN domain-like||XPG-I domain
OS03G0835100	osa-miR435	-	Domain of unknown function DUF3406, chloroplast translocase||P-loop containing nucleoside triphosphate hydrolase||Chloroplast protein import component Toc86/159
OS03G0835600	osa-miR2055	-	FERM/acyl-CoA-binding protein, 3-helical bundle||Kelch-type beta propeller||Acyl-CoA-binding protein, ACBP||Kelch repeat type 1
OS03G0836800	osa-miR812o-3p,osa-miR6248,osa-miR1436,osa-miR5799,osa-miR812a,osa-miR812s	-	Peptidase M20||Peptidase M20, dimerisation domain
OS03G0837300	osa-miR818a	-	Quinolinate phosphoribosyl transferase, C-terminal||Nicotinate phosphoribosyltransferase family||Quinolinate phosphoribosyl transferase, N-terminal||Nicotinate phosphoribosyltransferase pncB type
OS03G0837700	osa-miR169r-3p	-	DnaJ domain
OS03G0838400	osa-miR812n-3p,novel_3	AMT3-2	Ammonium/urea transporter||Ammonium transporter AmtB-like domain||Blood group Rhesus C/E/D polypeptide||Ammonium transporter
OS03G0843600	osa-miR5819	-	CASTOR/POLLUX/SYM8 ion channels||NAD(P)-binding domain
OS03G0843800	osa-miR5161,osa-miR5831	-	S-adenosyl-L-methionine-dependent methyltransferase-like||TPMT family
OS03G0844600	osa-miR5788,osa-miR529b	-	Lipase, GDSL||SGNH hydrolase-type esterase domain
OS03G0844900	osa-miR2103	-	RNA-binding domain, S1||Nucleic acid-binding, OB-fold||Ribosomal protein S1, RNA-binding domain
OS03G0845500	osa-miR1852	-	AMP-binding, conserved site||AMP-dependent synthetase/ligase
OS03G0849700	osa-miR1850.1	-	Tetratricopeptide-like helical||Pentatricopeptide repeat
OS03G0850100	osa-miR5788	-	HAD-like domain||NLI interacting factor||Dullard phosphatase domain, eukaryotic
OS03G0850600	osa-miR1860-5p	-	Protein of unknown function DUF2301
OS03G0850700	osa-miR437,osa-miR1879	-	CRAL-TRIO domain||CRAL/TRIO, N-terminal domain
OS03G0850900	osa-miR408-3p	-	Plastocyanin-like||Blue (type 1) copper protein, binding site
OS03G0851900	osa-miR5825	-	P-loop containing nucleoside triphosphate hydrolase||ATPase, AFG1-like
OS03G0852200	osa-miR5337b,osa-miR5337a	DER2	Derlin
OS03G0852700	osa-miR1848	-	Tetratricopeptide-like helical||Pentatricopeptide repeat
OS03G0854500	osa-miR444b.2	HSFA1	Heat shock transcription factor family||Heat shock transcription factor, plant||Heat shock factor (HSF)-type, DNA-binding||Winged helix-turn-helix DNA-binding domain
OS03G0856500	osa-miR5799,osa-miR812a	-	Ribosomal protein S30Ae/sigma 54 modulation protein
OS03G0858700	osa-miR5817	-	Protein of unknown function DUF1499
OS04G0101800	osa-miR1439	-	von Willebrand factor, type A||Zinc finger, RING-type||Zinc finger, RING/FYVE/PHD-type
OS04G0102700	osa-miR1854-5p	-	Amidase, conserved site||Amidase signature domain
OS04G0105500	osa-miR1439,osa-miR1436	-	UMP-CMP kinase||Adenylate kinase||P-loop containing nucleoside triphosphate hydrolase
OS04G0106400	osa-miR1442	-	D-isomer specific 2-hydroxyacid dehydrogenase, catalytic domain||NAD(P)-binding domain||D-isomer specific 2-hydroxyacid dehydrogenase, NAD-binding
OS04G0106500	novel_3	-	Domain of unknown function DUF4378
OS04G0107500	osa-miR815a	-	D-isomer specific 2-hydroxyacid dehydrogenase, catalytic domain||NAD(P)-binding domain||D-isomer specific 2-hydroxyacid dehydrogenase, NAD-binding
OS04G0111500	osa-miR1850.1	-	Exocyst complex protein Exo70||Cullin repeat-like-containing domain
OS04G0111900	osa-miR1439,osa-miR2118e	-	P-loop containing nucleoside triphosphate hydrolase
OS04G0112300	osa-miR5076	-	tRNA (adenine-N(1)-)-methyltransferase, non-catalytic TRM6 subunit
OS04G0115500	osa-miR812v	-	Zinc finger, C2H2||Poly(ADP-ribose) polymerase, catalytic domain
OS04G0117300	osa-miR1876	-	Sec7 domain||Sec7 domain, alpha orthogonal bundle||Armadillo-type fold
OS04G0117900	osa-miR444f	-	Amidase signature domain||Amidase, conserved site
OS04G0118700	osa-miR5819	-	Pentatricopeptide repeat||Tetratricopeptide-like helical
OS04G0120300	novel_3	-	Peptidase S8, subtilisin-related||Peptidase S8, subtilisin, Ser-active site||Peptidase S8/S53 domain
OS04G0121100	osa-miR5526,osa-miR1436,osa-miR1439	-	Peptidase S8, subtilisin-related||Proteinase inhibitor I9||Peptidase S8/S53 domain||Peptidase S8, subtilisin, Ser-active site
OS04G0122000	osa-miR818a	-	Leucine-rich repeat-containing N-terminal, type 2||Leucine-rich repeat||Leucine-rich repeat, typical subtype
OS04G0125700	osa-miR818a,osa-miR1436	-	Protein kinase, ATP binding site||Legume lectin domain||Protein kinase domain||Legume lectin, beta chain, Mn/Ca-binding site||Concanavalin A-like lectin/glucanase, subgroup||Serine/threonine-protein kinase, active site||Serine/threonine- / dual specificity protein kinase, catalytic domain||Protein kinase-like domain
OS04G0127500	osa-miR2873b	-	Epidermal growth factor-like domain||EGF-like calcium-binding, conserved site||Wall-associated receptor kinase galacturonan-binding domain||Protein kinase, ATP binding site||EGF-like calcium-binding domain||Protein kinase domain||Serine-threonine/tyrosine-protein kinase catalytic domain||Concanavalin A-like lectin/glucanase, subgroup||Serine/threonine- / dual specificity protein kinase, catalytic…
OS04G0128300	osa-miR5794	-	Transposase-associated domain
OS04G0129300	osa-miR5157a-3p	-	YTH domain
OS04G0131850	osa-miR1436,osa-miR6248,osa-miR818a	-	UDP-glucuronosyl/UDP-glucosyltransferase
OS04G0131900	osa-miR6248,osa-miR1436	-	UDP-glucuronosyl/UDP-glucosyltransferase||Glycosyl transferase, family 28
OS04G0147200	osa-miR812s,osa-miR812a,osa-miR812o-5p	-	Protein of unknown function DUF594||Domain of unknown function DUF4220
OS04G0154700	osa-miR395o,osa-miR395c	-	Protein of unknown function DUF594||Domain of unknown function DUF4220
OS04G0161850	osa-miR818a,osa-miR1436	-	S-locus glycoprotein||S-locus glycoprotein, mannose-binding-type||Bulb-type lectin domain||Apple-like
OS04G0162100	osa-miR5150-3p	-	Polycomb protein, VEFS-Box
OS04G0165600	osa-miR818a	-	Peptidase S26A, signal peptidase I, lysine active site||Peptidase S24/S26A/S26B/S26C||Peptidase S26A, signal peptidase I||Peptidase S24/S26, beta-ribbon domain||Peptidase S24/S26A/S26B
OS04G0171800	osa-miR812o-5p	-	Cytochrome P450, conserved site||Cytochrome P450||Cytochrome P450, E-class, group I
OS04G0176400	osa-miR815a	-	Alpha/Beta hydrolase fold||Peptidase S10, serine carboxypeptidase, active site||Peptidase S10, serine carboxypeptidase
OS04G0179700	osa-miR1439,osa-miR1436	KSL4	Terpenoid cyclases/protein prenyltransferase alpha-alpha toroid||Terpene synthase, N-terminal domain||Terpene synthase, metal-binding domain||Terpenoid synthase
OS04G0181901	osa-miR1436	-	Isopenicillin N synthase-like
OS04G0185500	osa-miR6248	-	Zinc finger, RING-type||Zinc finger, RING/FYVE/PHD-type
OS04G0192775	osa-miR1442	-	Methyl-CpG DNA binding||DNA-binding domain
OS04G0193950	osa-miR5808,osa-miR5801	-	P-loop containing nucleoside triphosphate hydrolase
OS04G0195400	osa-miR444a-3p.2,osa-miR408-3p	-	Transposase, MuDR, plant
OS04G0196200	osa-miR1436	-	Caffeate O-methyltransferase (COMT) family||Plant methyltransferase dimerisation||Winged helix-turn-helix DNA-binding domain||O-methyltransferase, family 2||S-adenosyl-L-methionine-dependent methyltransferase-like
OS04G0201800	osa-miR5810,osa-miR1436	-	Amino acid transporter, transmembrane
OS04G0203400	osa-miR1436,osa-miR1879,osa-miR818a	-	Domain of unknown function DUF4409
OS04G0206600	osa-miR1436,osa-miR2121a	-	UDP-glucuronosyl/UDP-glucosyltransferase
OS04G0209200	osa-miR818a	-	AAA+ ATPase domain||ABC transporter type 1, transmembrane domain||ABC transporter, conserved site||P-loop containing nucleoside triphosphate hydrolase||ABC transporter-like
OS04G0212200	osa-miR1436,osa-miR6248	-	Vacuolar protein sorting-associated protein 54
OS04G0219600	osa-miR5161	-	P-loop containing nucleoside triphosphate hydrolase
OS04G0220300	osa-miR5788,osa-miR5825,osa-miR437,osa-miR5490	-	Epidermal growth factor-like domain||EGF-like calcium-binding, conserved site||EGF-like calcium-binding domain||Insulin-like growth factor binding protein, N-terminal||EGF-type aspartate/asparagine hydroxylation site||Wall-associated receptor kinase galacturonan-binding domain
OS04G0221300	osa-miR444a-3p.2	-	Pentatricopeptide repeat||Tetratricopeptide-like helical
OS04G0221600	osa-miR1436	-	Zinc finger, RING/FYVE/PHD-type||Zinc finger, PHD-type, conserved site||Zinc finger, FYVE/PHD-type||Zinc finger, PHD-type
OS04G0223000	osa-miR1436,osa-miR6248,osa-miR171f-5p	-	Sec1-like, domain 2||Vacuolar protein sorting-associated protein 33||Sec1-like protein
OS04G0243400	osa-miR529b	-	Myb/SANT-like domain
OS04G0249500	osa-miR444b.1	SUS7	Glycosyl transferase, family 1||Sucrose synthase, plant/cyanobacteria||Sucrose synthase
OS04G0249600	osa-miR5161	-	Rhodanese-like domain
OS04G0250700	osa-miR818a,osa-miR3981-5p,osa-miR812v,osa-miR812a,osa-miR5788,osa-miR812o-5p	-	PSPTO4464-like domain||Ribosome-associated, YjgA
OS04G0252400	osa-miR1436	-	Sec1-like protein
OS04G0270100	osa-miR1439,osa-miR1436,osa-miR5825,osa-miR437	-	P-loop containing nucleoside triphosphate hydrolase||Translation protein, beta-barrel domain||Elongation factor, GTP-binding domain||Translation elongation factor EF1A/initiation factor IF2gamma, C-terminal||Translation elongation factor EFTu/EF1A, C-terminal||Translation elongation factor EFTu/EF1A, domain 2||Tr-type G domain, conserved site
OS04G0272700	osa-miR812a	-	UDP-glucuronosyl/UDP-glucosyltransferase
OS04G0273900	osa-miR2121a	-	DNA-binding domain||Methyl-CpG DNA binding
OS04G0278200	osa-miR1863a,osa-miR820a,osa-miR390-3p	-	Tetratricopeptide repeat-containing domain||Tetratricopeptide repeat||Tetratricopeptide-like helical
OS04G0278900	osa-miR390-3p,osa-miR820a	-	tRNA-dihydrouridine synthase||Aldolase-type TIM barrel||tRNA-dihydrouridine synthase, conserved site
OS04G0280200	osa-miR5162,osa-miR1436	-	P-loop containing nucleoside triphosphate hydrolase||Phosphoribulokinase/uridine kinase||AAA+ ATPase domain||Uridine kinase||CYTH-like domain
OS04G0281900	osa-miR7692-3p	-	Uncharacterised protein family UPF0497, trans-membrane plant||Uncharacterised protein family UPF0497, trans-membrane plant subgroup
OS04G0291900	osa-miR1319a	-	Protein kinase-like domain||Serine-threonine/tyrosine-protein kinase catalytic domain||Protein kinase domain
OS04G0298700	osa-miR2880	-	Clp, N-terminal||Double Clp-N motif
OS04G0304200	osa-miR818a	PHOT2	Protein kinase, ATP binding site||PAS domain||Serine/threonine-protein kinase, active site||Serine/threonine- / dual specificity protein kinase, catalytic domain||Protein kinase-like domain||Protein kinase domain||PAC motif||PAS-associated, C-terminal
OS04G0304400	osa-miR444a-3p.2,osa-miR444f	MADS25	Transcription factor, K-box||Transcription factor, MADS-box
OS04G0306800	osa-miR1439,osa-miR1436,osa-miR1862f	-	Nucleotide-binding, alpha-beta plait||RNA recognition motif domain
OS04G0307200	osa-miR1436	-	DnaJ domain||C2 domain||Sec63 domain||Immunoglobulin E-set||Translocation protein Sec63
OS04G0309600	osa-miR444b.1	SUS5	Sucrose synthase, plant/cyanobacteria||Sucrose synthase||Glycosyl transferase, family 1
OS04G0313500	osa-miR6249a	-	F-box domain
OS04G0313600	osa-miR6248	-	Zinc finger, CCHC-type
OS04G0321600	osa-miR3979-5p,osa-miR5788	SPT16	Peptidase M24, structural domain||Creatinase/Aminopeptidase P/Spt16, N-terminal||FACT complex subunit Spt16p/Cdc68p||FACT complex subunit Spt16, N-terminal lobe domain||Domain of unknown function DUF1747
OS04G0321700	osa-miR2090,osa-miR814a	-	Peptidase S10, serine carboxypeptidase||Peptidase S10, serine carboxypeptidase, active site||Alpha/Beta hydrolase fold
OS04G0321800	osa-miR5536	-	Protein phosphatase 2C (PP2C)-like domain||Protein phosphatase 2C
OS04G0324550	osa-miR6248	-	Zinc finger, CCHC-type
OS04G0330900	osa-miR1429-3p	-	Aspartic peptidase domain
OS04G0334700	osa-miR810b.2	-	Aspartic peptidase domain||Aspartic peptidase
OS04G0336600	osa-miR810b.2	-	Aspartic peptidase||Aspartic peptidase domain
OS04G0337000	osa-miR1846a-5p	-	Aspartic peptidase||Aspartic peptidase domain
OS04G0337800	osa-miR5812	-	Aldo/keto reductase||NADP-dependent oxidoreductase domain
OS04G0338100	osa-miR1439,osa-miR1436	-	NADP-dependent oxidoreductase domain||Aldo/keto reductase
OS04G0340300	osa-miR6248	-	Terpene synthase, N-terminal domain||Terpenoid cyclases/protein prenyltransferase alpha-alpha toroid||Terpenoid synthase||Terpene synthase, metal-binding domain
OS04G0347400	osa-miR5536	-	DNA-binding pseudobarrel domain||B3 DNA binding domain
OS04G0349500	osa-miR171f-5p	-	Ribosomal protein S8e, conserved site||Ribosomal protein S8e||Ribosomal protein S8e/ribosomal biogenesis NSA2
OS04G0350000	osa-miR1863a	-	Tetratricopeptide-like helical||Twin-arginine translocation pathway, signal sequence||Pentatricopeptide repeat
OS04G0350700	osa-miR156k	-	Basic helix-loop-helix (bHLH) transcription factors BEE-like, plant||Myc-type, basic helix-loop-helix (bHLH) domain
OS04G0354400	osa-miR396a-5p,osa-miR396c-5p	-	Fatty acyl-CoA reductase||NAD(P)-binding domain||Male sterility, NAD-binding
OS04G0356600	osa-miR1440b	-	Protein kinase, ATP binding site||Bulb-type lectin domain||S-receptor-like serine/threonine-protein kinase||Concanavalin A-like lectin/glucanase, subgroup||S-locus glycoprotein||Serine/threonine- / dual specificity protein kinase, catalytic domain||Protein kinase-like domain||Serine/threonine-protein kinase, active site||Protein kinase domain||Apple-like
OS04G0360500	osa-miR1857-5p	-	FAD linked oxidase, N-terminal||FAD-binding, type 2, subdomain 1||FAD-binding, type 2||CO dehydrogenase flavoprotein-like, FAD-binding, subdomain 2
OS04G0365100	osa-miR1436,osa-miR1439	-	Protein kinase, ATP binding site||EGF-like calcium-binding domain||Wall-associated receptor kinase galacturonan-binding domain||Insulin-like growth factor binding protein, N-terminal||Epidermal growth factor-like domain||EGF-like calcium-binding, conserved site||Concanavalin A-like lectin/glucanase, subgroup||Serine/threonine- / dual specificity protein kinase, catalytic domain||EGF-type aspartat…
OS04G0368000	osa-miR390-5p	-	Concanavalin A-like lectin/glucanase, subgroup||Serine/threonine-protein kinase, active site||EGF-type aspartate/asparagine hydroxylation site||Serine/threonine- / dual specificity protein kinase, catalytic domain||Protein kinase-like domain||Protein kinase domain||EGF-like calcium-binding domain||Wall-associated receptor kinase galacturonan-binding domain||Epidermal growth factor-like domain||EG…
OS04G0368300	osa-miR390-5p	-	Concanavalin A-like lectin/glucanase, subgroup||Protein kinase-like domain||Serine/threonine- / dual specificity protein kinase, catalytic domain||Serine/threonine-protein kinase, active site||Protein kinase domain||Insulin-like growth factor binding protein, N-terminal||Wall-associated receptor kinase galacturonan-binding domain||EGF-like calcium-binding domain||Epidermal growth factor-like doma…
OS04G0369100	osa-miR2100-5p	-	Mannose-binding lectin
OS04G0370900	osa-miR5830,osa-miR5788	-	Concanavalin A-like lectin/glucanase, subgroup||Serine/threonine-protein kinase, active site||EGF-type aspartate/asparagine hydroxylation site||Serine/threonine- / dual specificity protein kinase, catalytic domain||Protein kinase-like domain||Protein kinase domain||EGF-like calcium-binding domain||Wall-associated receptor kinase galacturonan-binding domain||Insulin-like growth factor binding prot…
OS04G0375300	osa-miR5076,osa-miR2118f,osa-miR2118c	-	P-loop containing nucleoside triphosphate hydrolase
OS04G0378200	osa-miR5148a,osa-miR5150-3p,osa-miR5150-5p	-	Sterile alpha motif domain||Sterile alpha motif/pointed domain
OS04G0379400	osa-miR1436	-	Uncharacterised protein family Ycf49
OS04G0380300	osa-miR1862e	-	Galactose oxidase, beta-propeller||Kelch repeat type 1
OS04G0381000	osa-miR1439	-	Dynamin-type guanine nucleotide-binding (G) domain||GTPase effector domain, GED||Dynamin, GTPase domain||Dynamin central domain||P-loop containing nucleoside triphosphate hydrolase||Dynamin GTPase effector||Dynamin superfamily
OS04G0381100	osa-miR1439	BASS1	Bile acid:sodium symporter
OS04G0381700	osa-miR812k,osa-miR812o-5p	-	Myc-type, basic helix-loop-helix (bHLH) domain
OS04G0382700	osa-miR5542	-	Vacuolar protein sorting protein 11, C-terminal||Zinc finger, RING-type||Zinc finger, RING/FYVE/PHD-type||Tetratricopeptide-like helical||Vacuolar protein sorting-associated protein 11||Clathrin, heavy chain/VPS, 7-fold repeat||WD40-repeat-containing domain
OS04G0391900	osa-miR395a	-	Amidohydrolase 1
OS04G0393200	osa-miR1319b,novel_3	-	Twin-arginine translocation pathway, signal sequence||Glioma tumor suppressor candidate region
OS04G0393300	osa-miR818a,osa-miR3981-3p	MUB4	Membrane-anchored ubiquitin-fold protein, HCG-1||Ubiquitin-related domain
OS04G0394300	osa-miR6248	-	Zinc finger, CCCH-type||RNA recognition motif domain||Nucleotide-binding, alpha-beta plait
OS04G0395600	osa-miR1427,osa-miR393a	-	F-box domain||Leucine-rich repeat, cysteine-containing subtype
OS04G0397700	osa-miR815a	-	Kinetochore component CENP-S
OS04G0398000	osa-miR5819	-	DNA-binding domain||AP2/ERF domain
OS04G0398800	osa-miR818a,osa-miR1436	-	WASH complex, subunit strumpellin
OS04G0399000	osa-miR1868,osa-miR1436	-	Ribosomal protein S27e, zinc-binding domain||Ribosomal protein S27e||Zinc-binding ribosomal protein
OS04G0399300	osa-miR5536	-	NUDIX hydrolase domain||NUDIX hydrolase domain-like||NUDIX hydrolase, conserved site
OS04G0401300	osa-miR5143a,osa-miR818a	-	Immunoglobulin E-set||SNF1 protein kinase subunit beta-2/beta-3
OS04G0402200	osa-miR5808,osa-miR1436,osa-miR1439	-	RNA-induced silencing complex, nuclease component Tudor-SN||Staphylococcal nuclease domain-containing protein 1||Tudor domain||Staphylococcal nuclease (SNase-like), OB-fold
OS04G0404800	osa-miR2096-3p	-	AMP-binding, conserved site||AMP-dependent synthetase/ligase||Acetate-CoA ligase||AMP-binding enzyme C-terminal domain
OS04G0404900	osa-miR812k,osa-miR812n-5p	-	Protein of unknown function DUF1624
OS04G0409600	osa-miR5794	-	Histone deacetylase superfamily||Histone deacetylase domain||Histone deacetylase
OS04G0412000	osa-miR812v,osa-miR1439,osa-miR1442	-	Alpha/Beta hydrolase fold||Alpha/beta hydrolase fold-1
OS04G0412900	osa-miR1436	-	von Willebrand factor, type A||Sec23/Sec24, trunk domain||Zinc finger, Sec23/Sec24-type||Sec23/Sec24, helical domain
OS04G0413100	osa-miR1846a-5p	-	The fantastic four family
OS04G0413200	osa-miR812o-3p,osa-miR812a	CIN3	Glycosyl hydrolase, five-bladed beta-propellor domain||Glycosyl hydrolase family 32, C-terminal||Glycoside hydrolase, family 32||Glycosyl hydrolase family 32, N-terminal||Glycoside hydrolase, family 32, active site||Concanavalin A-like lectin/glucanase, subgroup
OS04G0413500	osa-miR1439,osa-miR1436	CIN2	Glycosyl hydrolase family 32, C-terminal||Glycosyl hydrolase, five-bladed beta-propellor domain||Glycoside hydrolase, family 32||Glycosyl hydrolase family 32, N-terminal||Concanavalin A-like lectin/glucanase, subgroup||Glycoside hydrolase, family 32, active site
OS04G0414300	osa-miR156a	-	Nucleotide-binding, alpha-beta plait||RNA recognition motif domain
OS04G0415200	osa-miR437	-	TB2/DP1/HVA22-related protein
OS04G0416100	osa-miR1857-3p	-	Winged helix-turn-helix DNA-binding domain||Transcription factor E2F/dimerisation partner (TDP)||E2F Family
OS04G0416400	osa-miR5076	-	Thioredoxin-like fold||Alkyl hydroperoxide reductase subunit C/ Thiol specific antioxidant
OS04G0422300	osa-miR1439	-	WAT1-related protein||Drug/metabolite transporter
OS04G0422950	osa-miR171f-5p	-	Myb/SANT-like domain
OS04G0425100	osa-miR814a	-	Zinc finger, RING/FYVE/PHD-type||Zinc finger, PHD-type, conserved site||Zinc finger, PHD-finger||Zinc finger, FYVE/PHD-type||Zinc finger, CW-type||Zinc finger, PHD-type
OS04G0429100	osa-miR3981-3p	-	Post-SET domain||SET domain
OS04G0429600	novel_3,osa-miR1436	CSLH3	Cellulose synthase
OS04G0430200	osa-miR2905	-	PLC-like phosphodiesterase, TIM beta/alpha-barrel domain||Phospholipase C, phosphatidylinositol-specific , X domain
OS04G0430700	novel_3	-	Peptidase S8, subtilisin-related||Proteinase inhibitor I9||Peptidase S8, subtilisin, Ser-active site||Peptidase S8/S53 domain
OS04G0430900	osa-miR1436	MRS2-D	-
OS04G0432400	osa-miR395f,osa-miR5825	-	Six-hairpin glycosidase-like||Glycosyl hydrolase family 100
OS04G0433800	osa-miR1436	-	RQC domain||Helicase, superfamily 1/2, ATP-binding domain||DNA helicase, ATP-dependent, RecQ type||DNA/RNA helicase, DEAD/DEAH box type, N-terminal||Winged helix-turn-helix DNA-binding domain||Helicase, C-terminal||HRDC domain||P-loop containing nucleoside triphosphate hydrolase||DNA/RNA helicase, ATP-dependent, DEAH-box type, conserved site
OS04G0434600	osa-miR5150-5p	-	Kinesin-like protein||P-loop containing nucleoside triphosphate hydrolase||Kinesin, motor domain||Kinesin, motor region, conserved site
OS04G0434800	osa-miR1862f,osa-miR1862a	APX7	Haem peroxidase||Peroxidases heam-ligand binding site||Haem peroxidase, plant/fungal/bacterial||Plant ascorbate peroxidase
OS04G0435100	osa-miR1439	-	Amino acid/polyamine transporter I||Amino acid permease, conserved site
OS04G0436100	osa-miR1432-5p	-	Thioesterase superfamily||Phenylacetic acid degradation-related domain||HotDog domain
OS04G0436800	osa-miR6248	-	Pentatricopeptide repeat
OS04G0438200	osa-miR1846a-5p	-	Concanavalin A-like lectin/glucanase, subgroup
OS04G0439600	novel_3	-	Protein kinase domain||Regulator of chromosome condensation 1/beta-lactamase-inhibitor protein II||Concanavalin A-like lectin/glucanase, subgroup||Serine/threonine- / dual specificity protein kinase, catalytic domain||Serine/threonine-protein kinase, active site||Protein kinase-like domain||Protein kinase, ATP binding site
OS04G0439900	osa-miR437,osa-miR5498	-	Heat shock chaperonin-binding
OS04G0440000	osa-miR1436	-	Domain of unknown function DUF2040
OS04G0441600	osa-miR5794	-	P-loop containing nucleoside triphosphate hydrolase
OS04G0441800	osa-miR6249a	-	Proton-dependent oligopeptide transporter family||Major facilitator superfamily domain
OS04G0441900	osa-miR1439	-	Cleft lip and palate transmembrane 1
OS04G0442000	osa-miR172b,osa-miR1436	ARF9	Phox/Bem1p||B3 DNA binding domain||DNA-binding pseudobarrel domain||AUX/IAA protein||Auxin response factor
OS04G0442200	osa-miR1436	-	Acyl-CoA N-acyltransferase||Protein of unknown function DUF482
OS04G0442300	osa-miR812f,osa-miR3979-5p,osa-miR812p,osa-miR812g,osa-miR812v	-	CheY-like superfamily||Signal transduction response regulator, receiver domain
OS04G0443500	osa-miR5161,osa-miR1862e,osa-miR1436	-	Alpha/beta hydrolase fold-1||Alpha/Beta hydrolase fold||Epoxide hydrolase-like||Protein phosphatase methylesterase, eukaryotic
OS04G0443801	osa-miR3981-5p	OPR13	Cytochrome c oxidase biogenesis protein Cmc1-like||NADH:flavin oxidoreductase/NADH oxidase, N-terminal||Aldolase-type TIM barrel
OS04G0444400	osa-miR1436,osa-miR1439,osa-miR812a,osa-miR5788	-	Mlo-related protein
OS04G0445000	osa-miR1862a,osa-miR529a,osa-miR1862f	-	Cyclic nucleotide-binding-like||Ankyrin repeat||RmlC-like jelly roll fold||Cyclic nucleotide-binding domain||Ankyrin repeat-containing domain
OS04G0445700	osa-miR1846a-3p	-	Beta-ketoacyl synthase, C-terminal||Beta-ketoacyl synthase, N-terminal||3-oxoacyl-[acyl-carrier-protein] synthase 2||Beta-ketoacyl synthase, active site||Polyketide synthase, beta-ketoacyl synthase domain
OS04G0445800	osa-miR1849	-	Like-Sm (LSM) domain||Ribonucleoprotein LSM domain
OS04G0446300	osa-miR5794	-	Signal peptidase complex subunit 2
OS04G0448000	osa-miR1439,osa-miR1436	-	Protein of unknown function DUF3537
OS04G0448900	osa-miR156l-5p	ZEP	Monooxygenase, FAD-binding||Forkhead-associated (FHA) domain||SMAD/FHA domain||Zeaxanthin epoxidase
OS04G0450100	osa-miR1848	-	Alpha/Beta hydrolase fold||Serine hydrolase FSH
OS04G0451200	osa-miR1436,osa-miR818a	-	UDP-glucuronosyl/UDP-glucosyltransferase
OS04G0452000	osa-miR818a	-	Protein phosphatase 2C||Protein phosphatase 2C (PP2C)-like domain
OS04G0452100	osa-miR1848	-	DNA photolyase, N-terminal||Rossmann-like alpha/beta/alpha sandwich fold
OS04G0452400	osa-miR812o-5p,osa-miR812a,osa-miR812s	-	Ubiquitin carboxyl-terminal hydrolases family 2||Ubiquitin carboxyl-terminal hydrolase-like domain||Peptidase C19, ubiquitin carboxyl-terminal hydrolase 2, conserved site
OS04G0452500	osa-miR1436	ZEP1	-
OS04G0453400	osa-miR2090	-	Major facilitator superfamily domain||Sugar/inositol transporter||Sugar transporter, conserved site||General substrate transporter
OS04G0457000	osa-miR2098-5p	-	Chlorophyll A-B binding protein||Chlorophyll A-B binding protein, plant||Chlorophyll a/b binding protein domain
OS04G0457300	osa-miR3981-3p	-	WAT1-related protein
OS04G0459000	novel_3	-	ABC transporter type 1, transmembrane domain||ABC transporter, conserved site||P-loop containing nucleoside triphosphate hydrolase||ABC transporter-like||AAA+ ATPase domain
OS04G0460600	osa-miR2098-5p,osa-miR164c,osa-miR164d,osa-miR164a,osa-miR164e	-	NAC domain
OS04G0461100	osa-miR1848	-	Ribosomal protein PSRP-3/Ycf65
OS04G0461300	osa-miR437,osa-miR444b.2,osa-miR444f,osa-miR5799,osa-miR444b.1,osa-miR1442,osa-miR444a-3p.1,osa-miR812a,osa-miR444a-3p.2	-	Transcription factor, MADS-box
OS04G0462500	osa-miR1436	GF14B	14-3-3 protein, conserved site||14-3-3 protein||14-3-3 domain
OS04G0463800	osa-miR6247	-	Tetratricopeptide-like helical||Pentatricopeptide repeat
OS04G0464500	osa-miR437	-	SEP domain||Ubiquitin-related domain
OS04G0465100	osa-miR3979-3p	-	Plant peroxidase||Peroxidase, active site||Haem peroxidase||Peroxidases heam-ligand binding site||Haem peroxidase, plant/fungal/bacterial
OS04G0465600	osa-miR3979-5p	-	Bet v I type allergen||Major latex protein domain||Bet v I domain||START-like domain
OS04G0466600	osa-miR1442	-	Agmatine deiminase||Peptidyl-arginine deiminase, Porphyromonas-type
OS04G0467800	osa-miR5512a	-	Nucleic acid-binding, OB-fold
OS04G0470700	osa-miR5819	-	Amino acid transporter, transmembrane
OS04G0471700	osa-miR169f.2	-	DNA-binding WRKY
OS04G0472200	osa-miR160e-3p	-	FAS1 domain
OS04G0472300	osa-miR169n	-	PLC-like phosphodiesterase, TIM beta/alpha-barrel domain||Glycerophosphodiester phosphodiesterase domain||Glycerophosphoryl diester phosphodiesterase
OS04G0474500	osa-miR818a	-	Glycoside hydrolase, superfamily||Glycoside hydrolase, catalytic domain||Glycoside hydrolase, family 1||Glycoside hydrolase, family 1, active site
OS04G0474700	osa-miR5542	-	Glycoside hydrolase, superfamily||Glycoside hydrolase, catalytic domain||Glycoside hydrolase, family 1||Glycoside hydrolase, family 1, active site
OS04G0475600	osa-miR1848	DAO	Isopenicillin N synthase-like||Non-haem dioxygenase N-terminal domain||Oxoglutarate/iron-dependent dioxygenase
OS04G0476600	osa-miR5808	-	C2 domain||GRAM domain
OS04G0480200	osa-miR5819,osa-miR6249a	NAR2.2	Transporter, high affinity nitrate, Nar2
OS04G0481900	osa-miR1848	-	Wax synthase
OS04G0482000	osa-miR1848	MSRA2-1	Peptide methionine sulphoxide reductase MsrA||Peptide methionine sulfoxide reductase
OS04G0485300	osa-miR395c	-	Glucose-6-phosphate dehydrogenase, active site||Glucose-6-phosphate dehydrogenase, NAD-binding||Glucose-6-phosphate dehydrogenase, C-terminal||Glucose-6-phosphate dehydrogenase||NAD(P)-binding domain
OS04G0485800	novel_4	-	Leucine-rich repeat, cysteine-containing subtype||F-box domain
OS04G0486800	osa-miR164a,osa-miR164d,osa-miR164e	-	Helicase, superfamily 1/2, ATP-binding domain||DNA helicase, ATP-dependent, RecQ type||P-loop containing nucleoside triphosphate hydrolase||DNA/RNA helicase, DEAD/DEAH box type, N-terminal||Helicase, C-terminal
OS04G0489100	osa-miR1436,osa-miR2871a-3p	-	Alpha/Beta hydrolase fold||Lipase, class 3
OS04G0489600	osa-miR1854-5p	-	Myc-type, basic helix-loop-helix (bHLH) domain
OS04G0492300	osa-miR1439	-	RNA polymerase Rpb1, domain 1||DNA-directed RNA polymerase III largest subunit||RNA polymerase Rpb1, domain 3||RNA polymerase Rpb1, domain 5||RNA polymerase, alpha subunit||RNA polymerase, N-terminal||RNA polymerase Rpb1, domain 4
OS04G0492600	osa-miR818a,osa-miR1436,osa-miR5788	-	Histidyl tRNA synthetase-related domain||Histidine-tRNA ligase/ATP phosphoribosyltransferase regulatory subunit||Anticodon-binding
OS04G0496400	osa-miR1436,osa-miR1439	-	Domain of unknown function DUF4339||Nucleotide-binding, alpha-beta plait||RNA recognition motif domain
OS04G0496800	osa-miR529a	-	LETM1-like||EF-hand domain pair||EF-hand domain||EF-Hand 1, calcium-binding site
OS04G0497350	osa-miR815a	-	Autophagy-related protein 3
OS04G0497400	osa-miR2875	-	6,7-dimethyl-8-ribityllumazine synthase, chloroplast||6,7-dimethyl-8-ribityllumazine synthase
OS04G0502200	osa-miR812n-5p,osa-miR812g,osa-miR812p,osa-miR812v	TRS120	TRAPP II complex, Trs120
OS04G0503500	osa-miR1436	-	Leucine-rich repeat||Leucine-rich repeat, cysteine-containing subtype
OS04G0503600	osa-miR156k	-	Protein kinase-like domain||Protein kinase, ATP binding site
OS04G0504500	osa-miR1848	-	DNA-binding domain||AP2/ERF domain||AP2-like ethylene-responsive transcription factor
OS04G0504800	osa-miR1436,osa-miR2905	-	RNA recognition motif domain||Nucleotide-binding, alpha-beta plait||Polyadenylate binding protein, human types 1, 2, 3, 4||Polyadenylate-binding protein/Hyperplastic disc protein||RNA recognition motif domain, eukaryote
OS04G0505000	osa-miR1850.1	-	Filament-like plant protein
OS04G0506800	osa-miR156k	-	Glycosyl transferase, family 29
OS04G0507700	osa-miR5821	-	Lipase, GDSL||SGNH hydrolase-type esterase domain
OS04G0508900	osa-miR167d-5p,osa-miR167a-5p,osa-miR1426	-	TFIIH C1-like domain||TFIIH subunit Ssl1/p44||Zinc finger, C2H2||von Willebrand factor, type A
OS04G0509100	osa-miR1436,osa-miR818a,osa-miR5788	-	Lipase, class 3||Alpha/Beta hydrolase fold||C2 domain
OS04G0509300	osa-miR1436	DCL4	Double-stranded RNA-binding domain||Ribonuclease III domain||Argonaute/Dicer protein, PAZ domain||Dicer dimerisation domain
OS04G0513400	osa-miR812a	-	Glycoside hydrolase, catalytic domain||Glycoside hydrolase, superfamily||Glycoside hydrolase, family 1, active site||Glycoside hydrolase, family 1
OS04G0515900	osa-miR5540	-	NAC domain
OS04G0517900	osa-miR810b.1	-	Auxin-induced protein, ARG7
OS04G0518000	osa-miR437	-	Carbohydrate/puine kinase, PfkB, conserved site||Adenosine kinase||Carbohydrate kinase PfkB
OS04G0518650	osa-miR399j,osa-miR399d	-	Small subunit of serine palmitoyltransferase-like
OS04G0519700	osa-miR160f-5p,osa-miR160a-5p,osa-miR160e-5p	ARF10	Auxin response factor||DNA-binding pseudobarrel domain||B3 DNA binding domain
OS04G0519925	osa-miR1436	-	Peptidase M28
OS04G0522800	osa-miR1871	-	PsbQ-like domain||Photosystem II PsbQ, oxygen evolving complex
OS04G0523500	osa-miR6248,osa-miR1862f,osa-miR1436,osa-miR812n-3p,osa-miR812n-5p	CKX8	CO dehydrogenase flavoprotein-like, FAD-binding, subdomain 2||FAD-binding, type 2||FAD-linked oxidase-like, C-terminal||Vanillyl-alcohol oxidase/Cytokinin dehydrogenase C-terminal domain||Cytokinin dehydrogenase 1, FAD/cytokinin binding domain||FAD linked oxidase, N-terminal
OS04G0525700	osa-miR1848	-	Alpha/Beta hydrolase fold||Peptidase S10, serine carboxypeptidase, active site||Peptidase S10, serine carboxypeptidase
OS04G0529600	osa-miR1426	-	LanC-like protein, eukaryotic||Lanthionine synthetase C-like
OS04G0529700	osa-miR6249a	-	Nucleotide-diphospho-sugar transferases||Glycosyltransferase, DXD sugar-binding motif||Alpha 1,4-glycosyltransferase domain
OS04G0530000	osa-miR7694-3p	-	Transcription factor TFIIIC, tau55-related
OS04G0533000	osa-miR5161	-	Helicase, C-terminal||RNA helicase, ATP-dependent, DEAD-box, conserved site||Helicase, superfamily 1/2, ATP-binding domain||RNA helicase, DEAD-box type, Q motif||DNA/RNA helicase, DEAD/DEAH box type, N-terminal||P-loop containing nucleoside triphosphate hydrolase
OS04G0534166	osa-miR3981-3p,osa-miR390-5p	-	Leucine-rich repeat||Leucine-rich repeat-containing N-terminal, type 2
OS04G0535400	novel_3	-	HIT-like domain||Histidine triad (HIT) protein
OS04G0540600	osa-miR812a,osa-miR812o-5p,osa-miR812o-3p	-	Aldehyde dehydrogenase domain||Aldehyde dehydrogenase NAD(P)-dependent||Aldehyde dehydrogenase, N-terminal||Aldehyde dehydrogenase, C-terminal||Aldehyde/histidinol dehydrogenase
OS04G0541500	osa-miR1436,osa-miR818a	-	ATP-NAD kinase-like domain||Diacylglycerol kinase, catalytic domain
OS04G0544900	osa-miR1436	-	GPI mannosyltransferase
OS04G0545100	osa-miR5076	-	Engulfment/cell motility, ELMO
OS04G0550400	osa-miR1436,osa-miR5788	BRE1A	-
OS04G0550500	osa-miR5079a,osa-miR5788	-	Amino-acid N-acetyltransferase (ArgA)||Glutamate/acetylglutamate kinase||Acetylglutamate kinase||Aspartate/glutamate/uridylate kinase
OS04G0551300	osa-miR5788,osa-miR166i-3p	-	GDP-fucose protein O-fucosyltransferase
OS04G0551500	osa-miR156a,osa-miR156k,osa-miR156l-5p	SPL7	Transcription factor, SBP-box
OS04G0551700	osa-miR1439	-	Plastid lipid-associated protein/fibrillin conserved domain
OS04G0552000	osa-miR1436	EXPB15	Major pollen allergen Lol pI||Expansin/Lol pI||Expansin/pollen allergen, DPBB domain||RlpA-like double-psi beta-barrel domain||Expansin, cellulose-binding-like domain
OS04G0555000	osa-miR171b,osa-miR171i-3p,osa-miR171a	-	Transcription factor GRAS
OS04G0557200	osa-miR1320-5p	-	Transcription factor MYC/MYB N-terminal||Myc-type, basic helix-loop-helix (bHLH) domain
OS04G0557800	osa-miR1436,osa-miR818a	-	Myc-type, basic helix-loop-helix (bHLH) domain||Transcription factor MYC/MYB N-terminal
OS04G0562000	osa-miR3979-3p	-	Zinc finger, DHHC-type, palmitoyltransferase
OS04G0563801	osa-miR2864.2	-	Sterol-sensing domain
OS04G0564600	osa-miR810b.1,osa-miR2098-5p	-	High mobility group box domain||High mobility group protein HMGB, plant
OS04G0566100	osa-miR5827	-	Helicase, C-terminal||Helicase, superfamily 1/2, ATP-binding domain||SNF2-related||P-loop containing nucleoside triphosphate hydrolase
OS04G0570800	osa-miR5490	-	S-adenosyl-L-methionine-dependent methyltransferase-like||Putative S-adenosyl-L-methionine-dependent methyltransferase
OS04G0571600	osa-miR166g-3p,osa-miR1848,osa-miR166a-3p,osa-miR166m	-	Multi antimicrobial extrusion protein
OS04G0572700	osa-miR5817	-	Zinc finger, CCCH-type
OS04G0573000	osa-miR1426,osa-miR827	-	Major facilitator superfamily domain||Major facilitator superfamily||SPX, N-terminal
OS04G0574500	osa-miR396g,osa-miR396e-5p	GRF12	-||Growth-regulating factor||Glutamine-Leucine-Glutamine, QLQ
OS04G0577700	novel_3	-	Ovate protein family, C-terminal
OS04G0578700	osa-miR1436	-	Mechanosensitive ion channel MscS||Mechanosensitive ion channel MscS, transmembrane-2||Like-Sm (LSM) domain
OS04G0581000	osa-miR812a,osa-miR812s,osa-miR5160,osa-miR812v	-	Oxoglutarate/iron-dependent dioxygenase||Isopenicillin N synthase-like||Non-haem dioxygenase N-terminal domain
OS04G0582000	novel_3	-	P-loop containing nucleoside triphosphate hydrolase
OS04G0583500	osa-miR529b	EXPA10	Expansin/pollen allergen, DPBB domain||Expansin, cellulose-binding-like domain||RlpA-like double-psi beta-barrel domain||-||Expansin/Lol pI
OS04G0585100	osa-miR5340	-	Zinc finger, DHHC-type, palmitoyltransferase
OS04G0593700	osa-miR1872	-	Ubiquitin-conjugating enzyme/RWD-like||RWD domain||E3 ubiquitin ligase RBR family
OS04G0596400	osa-miR5827	-	Domain of unknown function DUF59
OS04G0597000	osa-miR5819	SCAMP6	-
OS04G0598300	osa-miR815a	FL	Floricaula/leafy protein
OS04G0599650	osa-miR1436	-	P-loop containing nucleoside triphosphate hydrolase||Tetratricopeptide-like helical||UvrD-like Helicase, ATP-binding domain
OS04G0600900	osa-miR396g,osa-miR396e-5p,osa-miR159a.1,osa-miR396f-5p	GRF3	-||Growth-regulating factor
OS04G0601700	osa-miR5144-5p	-	Vacuolar (H+)-ATPase G subunit
OS04G0602500	osa-miR5337a	-	Protein notum homologue
OS04G0602600	osa-miR444a-3p.2	-	Tetratricopeptide-like helical||Pentatricopeptide repeat
OS04G0602700	osa-miR1427	-	RNA recognition motif domain||Nucleotide-binding, alpha-beta plait||Alpha-ketoglutarate-dependent dioxygenase AlkB-like||Oxoglutarate/iron-dependent dioxygenase
OS04G0602800	osa-miR169e,osa-miR169b	-	Protein kinase, ATP binding site||Serine/threonine- / dual specificity protein kinase, catalytic domain||Protein kinase-like domain||Serine/threonine-protein kinase, active site||Protein kinase domain
OS04G0604000	osa-miR1436	-	Gelsolin domain||Villin-2/3/4/5, plant||ADF-H/Gelsolin-like domain||Villin headpiece
OS04G0605300	osa-miR1436,osa-miR1439	IRL1	Leucine-rich repeat, typical subtype||Leucine-rich repeat
OS04G0605500	osa-miR1432-5p	-	P-type ATPase, cytoplasmic domain N||P-type ATPase, A domain||Cation-transporting P-type ATPase, C-terminal||HAD-like domain||Calcium-transporting P-type ATPase, subfamily IIB||Cation-transporting P-type ATPase, N-terminal||P-type ATPase, transmembrane domain||P-type ATPase, phosphorylation site||Calcium-transporting P-type ATPase, N-terminal autoinhibitory domain||Cation-transporting P-type ATPa…
OS04G0606400	osa-miR437	-	Glycoside hydrolase, family 47
OS04G0607100	osa-miR437,osa-miR5825	-	Glycosyl transferase, family 14
OS04G0607150	osa-miR3981-3p	-	TATA element modulatory factor 1 DNA binding
OS04G0607600	osa-miR529b,osa-miR444d.3	HKT7	Cation transporter
OS04G0608500	osa-miR1436	-	Proteasome/cyclosome repeat
OS04G0609900	osa-miR396c-5p,osa-miR396a-5p	-	Protein strawberry notch||Probable transposase, Ptta/En/Spm, plant
OS04G0611700	osa-miR6248	KSL3	Terpene synthase, metal-binding domain||Terpenoid synthase||Terpenoid cyclases/protein prenyltransferase alpha-alpha toroid||Terpene synthase, N-terminal domain
OS04G0612000	osa-miR812v,osa-miR815a	KSL2	Terpenoid synthase||Terpene synthase, metal-binding domain||Terpene synthase, N-terminal domain||Terpenoid cyclases/protein prenyltransferase alpha-alpha toroid
OS04G0612700	osa-miR5825	CAD7	Alcohol dehydrogenase, zinc-type, conserved site||Alcohol dehydrogenase superfamily, zinc-type||Alcohol dehydrogenase GroES-like||GroES (chaperonin 10)-like||Alcohol dehydrogenase, C-terminal||NAD(P)-binding domain||Polyketide synthase, enoylreductase
OS04G0613200	osa-miR812p,osa-miR812g,osa-miR812s,osa-miR812f	-	Pectin lyase fold/virulence factor||Pectin lyase fold
OS04G0613300	osa-miR1426	-	Protein of unknown function DUF2358
OS04G0613600	osa-miR1442	-	Nucleic acid-binding, OB-fold||Ribosomal protein S17||Ribosomal protein S17, archaeal/eukaryotic||Ribosomal protein S17, conserved site
OS04G0614600	osa-miR5536	OSL2	Pyridoxal phosphate-dependent transferase, major region, subdomain 1||Pyridoxal phosphate-dependent transferase||Aminotransferase class-III||Pyridoxal phosphate-dependent transferase, major region, subdomain 2
OS04G0616400	osa-miR437,osa-miR6248	-	Concanavalin A-like lectin/glucanase, subgroup||Serine/threonine- / dual specificity protein kinase, catalytic domain||Protein kinase-like domain||Serine/threonine-protein kinase, active site||Protein kinase, ATP binding site||Protein kinase domain
OS04G0616700	osa-miR5835	-	Concanavalin A-like lectin/glucanase, subgroup||Protein kinase, ATP binding site||Serine/threonine-protein kinase, active site||Serine/threonine- / dual specificity protein kinase, catalytic domain||Protein kinase-like domain||Protein kinase domain||Serine-threonine/tyrosine-protein kinase catalytic domain
OS04G0617800	osa-miR156a	-	Imidazoleglycerol-phosphate dehydratase, conserved site||Imidazoleglycerol-phosphate dehydratase||Ribosomal protein S5 domain 2-type fold
OS04G0619000	osa-miR1439	-	NAC domain
OS04G0619500	osa-miR6252	-	Ovarian tumour, otubain
OS04G0620400	osa-miR810b.2,osa-miR1436,osa-miR5485	-	SIT4 phosphatase-associated protein family||Armadillo-type fold
OS04G0624500	osa-miR2864.2	-	Polyphenol oxidase, C-terminal||Uncharacterised domain, di-copper centre||Polyphenol oxidase||Polyphenol oxidase, central domain
OS04G0625500	osa-miR6249a	-	BTB/POZ fold
OS04G0626600	osa-miR812a,osa-miR5799	-	F-box domain
OS04G0626700	osa-miR1863a	-	F-box domain
OS04G0628600	osa-miR1436	-	Vacuolar protein sorting-associated protein 13A N-terminal domain||UHRF1-binding protein 1-like
OS04G0629600	osa-miR1848	-	Zinc finger, CCHC-type
OS04G0629700	osa-miR1852	-	P-loop containing nucleoside triphosphate hydrolase||Kinesin, motor domain||Kinesin-like protein||Kinesin, motor region, conserved site
OS04G0630100	osa-miR3981-3p	-	NAD-dependent epimerase/dehydratase||NAD(P)-binding domain
OS04G0633200	osa-miR5542	-	Bulb-type lectin domain||Protein kinase, ATP binding site||Serine-threonine/tyrosine-protein kinase catalytic domain||Protein kinase domain||Apple-like||S-locus glycoprotein||Serine/threonine- / dual specificity protein kinase, catalytic domain||Serine/threonine-protein kinase, active site||Protein kinase-like domain||Concanavalin A-like lectin/glucanase, subgroup
OS04G0633900	osa-miR5831	-	S-receptor-like serine/threonine-protein kinase||Concanavalin A-like lectin/glucanase, subgroup||S-locus glycoprotein||Serine/threonine- / dual specificity protein kinase, catalytic domain||Protein kinase-like domain||Serine/threonine-protein kinase, active site||Protein kinase domain||Apple-like||Protein kinase, ATP binding site||Bulb-type lectin domain
OS04G0636300	osa-miR169f.2,osa-miR818a	-	Cys/Met metabolism, pyridoxal phosphate-dependent enzyme||Putative methionine gamma-lyase||Pyridoxal phosphate-dependent transferase||Pyridoxal phosphate-dependent transferase, major region, subdomain 1
OS04G0636600	osa-miR814a	-	Mitochondrial inner membrane protein Mitofilin
OS04G0636700	osa-miR5522	-	RNA polymerase II-binding domain||ENTH/VHS||CID domain
OS04G0637000	osa-miR2275a,osa-miR3979-5p,osa-miR1428a-5p	-	Basic-leucine zipper domain||Transcription factor TGA like domain
OS04G0640700	osa-miR5512a	-	Glycoside hydrolase family 3||Glycoside hydrolase family 3 C-terminal domain||Fibronectin type III-like domain||Glycoside hydrolase, superfamily||Glycoside hydrolase, family 3, N-terminal
OS04G0641400	osa-miR1436,osa-miR818a	-	RNA recognition motif domain||Nucleotide-binding, alpha-beta plait
OS04G0645100	osa-miR399i,osa-miR399j,osa-miR399d	-	Tetratricopeptide-like helical||Clustered mitochondria protein, N-terminal||GSKIP domain||Tetratricopeptide repeat||Tetratricopeptide repeat-containing domain
OS04G0647900	osa-miR6248	-	Leucine-rich repeat, typical subtype||Leucine-rich repeat-containing N-terminal, type 2||Leucine-rich repeat
OS04G0649100	osa-miR172a,osa-miR172b,osa-miR172c	-	AP2-like ethylene-responsive transcription factor||DNA-binding domain||AP2/ERF domain
OS04G0650700	osa-miR169r-5p	-	Peptidase T2, asparaginase 2||Nucleophile aminohydrolases, N-terminal
OS04G0651500	osa-miR1441	-	Wall-associated receptor kinase galacturonan-binding domain
OS04G0653600	osa-miR160a-3p	-	DNA-binding domain||AP2/ERF domain||AP2-like ethylene-responsive transcription factor
OS04G0656500	novel_3	SPL8	Transcription factor, SBP-box
OS04G0658400	osa-miR6249a	-	AAA+ ATPase domain||ABC transporter-like||P-loop containing nucleoside triphosphate hydrolase||ABC transporter, conserved site
OS04G0660200	osa-miR5835	-	UbiB domain||Protein kinase-like domain
OS04G0660500	osa-miR5161,osa-miR5337b	-	Protein kinase, ATP binding site||Armadillo-type fold||Protein kinase-like domain||Serine/threonine- / dual specificity protein kinase, catalytic domain||Serine/threonine-protein kinase, active site||Armadillo-like helical||Serine-threonine/tyrosine-protein kinase catalytic domain||Protein kinase domain
OS04G0661600	osa-miR812a,osa-miR812s,osa-miR812o-5p,osa-miR5788,osa-miR1436,osa-miR1862a	-	MoeA, N-terminal and linker domain||Molybdopterin binding domain||MoeA, C-terminal, domain IV||Molybdenum cofactor biosynthesis, conserved site
OS04G0663100	osa-miR396c-5p	-	IQ motif, EF-hand binding site||Domain of unknown function DUF4005
OS04G0666900	osa-miR818a,osa-miR1436	-	P-loop containing nucleoside triphosphate hydrolase||FERM central domain||FERM, N-terminal||FERM/acyl-CoA-binding protein, 3-helical bundle||Kinesin, motor region, conserved site||Kinesin, motor domain||MyTH4 domain||Kinesin-like protein||FERM domain||Pleckstrin homology-like domain||Band 4.1 domain
OS04G0667500	osa-miR818a,osa-miR1436	-	Peptidase C12, ubiquitin carboxyl-terminal hydrolase 1
OS04G0667900	osa-miR2103	-	Regulatory protein RecX||Winged helix-turn-helix DNA-binding domain
OS04G0669800	osa-miR1863a,osa-miR1863b	MTK1	Methylthioribose kinase||Aminoglycoside phosphotransferase||Protein kinase-like domain
OS04G0671900	osa-miR167a-5p,osa-miR1436	ARF12	DNA-binding pseudobarrel domain||B3 DNA binding domain||Phox/Bem1p||Auxin response factor||AUX/IAA protein
OS04G0672900	osa-miR818a,osa-miR1436	-	Domain of unknown function DUF2296
OS04G0676600	osa-miR812o-5p	-	DNA-binding pseudobarrel domain||B3 DNA binding domain
OS04G0677400	osa-miR5503	-	Protein of unknown function DUF639
OS04G0677700	osa-miR5337a	-	G-protein beta WD-40 repeat||WD40-repeat-containing domain||WD40 repeat||WD40/YVTN repeat-like-containing domain||Katanin p80 subunit B1||Katanin p80 subunit, C-terminal||WD40 repeat, conserved site
OS04G0677800	osa-miR7693-3p	-	P-loop containing nucleoside triphosphate hydrolase||Elongation factor, GTP-binding domain||Translation protein, beta-barrel domain||Zinc finger, RanBP2-type||Translation elongation factor EF1A/initiation factor IF2gamma, C-terminal||Translation elongation factor EFTu/EF1A, C-terminal
OS04G0678700	novel_3	PORA	NAD(P)-binding domain||Glucose/ribitol dehydrogenase||Short-chain dehydrogenase/reductase SDR||Light-dependent protochlorophyllide reductase
OS04G0680000	osa-miR6249a	-	Transcription factor TFIIH subunit p52/Tfb2
OS04G0680550	osa-miR1436	-	Tyrosine-tRNA ligase, archaeal/eukaryotic-type||Rossmann-like alpha/beta/alpha sandwich fold||Aminoacyl-tRNA synthetase, class Ic
OS04G0680700	osa-miR408-5p	-	DNA mismatch repair protein MutS, C-terminal||P-loop containing nucleoside triphosphate hydrolase||DNA mismatch repair protein MutS, core||Endonuclease MutS2
OS04G0680800	osa-miR6248	-	Mlo-related protein
OS04G0681400	osa-miR2275a	-	Choline transporter-like
OS04G0681600	osa-miR2275a	-	Choline transporter-like
OS04G0682100	osa-miR529a	-	C2 domain
OS04G0682300	osa-miR2863b	PMM	HAD-superfamily hydrolase, subfamily IIB||HAD-like domain||Eukaryotic phosphomannomutase
OS04G0682600	osa-miR5510	-	Ribonuclease H-like domain
OS04G0683600	osa-miR390-5p	-	Leucine-rich repeat-containing N-terminal, type 2||Leucine-rich repeat||Protein kinase-like domain
OS04G0683900	osa-miR1320-5p	-	Domain of unknown function DUF296
OS04G0684500	osa-miR1436,osa-miR818a,osa-miR5817	-	Pentatricopeptide repeat||Tetratricopeptide-like helical||RNA recognition motif domain||Nucleotide-binding, alpha-beta plait
OS04G0685400	osa-miR1846a-5p	-	Late embryogenesis abundant protein, LEA-14
OS04G0685900	osa-miR1846d-3p	-	Leucine-rich repeat-containing N-terminal, type 2||Protein kinase, ATP binding site||Leucine-rich repeat||Protein kinase-like domain||Serine/threonine- / dual specificity protein kinase, catalytic domain||Serine/threonine-protein kinase, active site||Concanavalin A-like lectin/glucanase, subgroup||Serine-threonine/tyrosine-protein kinase catalytic domain||Leucine-rich repeat, typical subtype||Pro…
OS04G0688200	osa-miR1439	-	Haem peroxidase||Plant peroxidase||Peroxidase, active site||Haem peroxidase, plant/fungal/bacterial||Peroxidases heam-ligand binding site
OS04G0688600	osa-miR6248	-	Peroxidases heam-ligand binding site||Haem peroxidase, plant/fungal/bacterial||Plant peroxidase||Peroxidase, active site||Haem peroxidase
OS04G0689300	osa-miR5821	-	PLC-like phosphodiesterase, TIM beta/alpha-barrel domain||Phospholipase C, phosphatidylinositol-specific , X domain
OS04G0689400	osa-miR437,osa-miR5337b	-	Serine/threonine- / dual specificity protein kinase, catalytic domain||Serine/threonine-protein kinase, active site||Protein kinase-like domain||Protein kinase, ATP binding site||Concanavalin A-like lectin/glucanase, subgroup||Protein kinase domain
OS04G0690100	osa-miR2873b	-	Poly(ADP-ribose) polymerase, catalytic domain||Zinc finger, C2H2
OS04G0690600	osa-miR160e-5p,osa-miR160f-5p,osa-miR160a-5p,osa-miR1436	ARF13	DNA-binding pseudobarrel domain||B3 DNA binding domain||Auxin response factor
OS04G0691300	osa-miR812f,osa-miR812p,osa-miR812g	-	NAC domain
OS04G0691600	osa-miR1849	RPS17	Ribosomal protein S17||Nucleic acid-binding, OB-fold
OS04G0691700	osa-miR812g,osa-miR812f,osa-miR812n-3p	-	Zinc finger, PHD-type||Zinc finger, FYVE/PHD-type||Zinc finger, PHD-finger||Zinc finger, RING/FYVE/PHD-type||Acyl-CoA N-acyltransferase||Increased DNA methylation 1||GNAT domain
OS04G0691900	osa-miR166i-3p	-	Phosphatidylinositol-4-phosphate 5-kinase, core, subgroup||Phosphatidylinositol-4-phosphate 5-kinase, C-terminal||Chaperonin Cpn60/TCP-1||Phosphatidylinositol-4-phosphate 5-kinase, N-terminal domain||Phosphatidylinositol-4-phosphate 5-kinase, core||GroEL-like apical domain
OS04G0692100	osa-miR5788	-	Ubiquitin domain||CAP Gly-rich domain||Ubiquitin-related domain
OS04G0692600	osa-miR164a	-	Staygreen protein
OS05G0100800	osa-miR1436,osa-miR818a	-	Nucleic acid-binding, OB-fold
OS05G0101200	osa-miR5340	-	Peroxisomal membrane protein 14||Peroxisome membrane anchor protein Pex14p, N-terminal
OS05G0101600	osa-miR1436	-	Cytochrome P450||Cytochrome P450, E-class, group I||Cytochrome P450, conserved site
OS05G0103200	osa-miR6248	-	Cyclophilin-like peptidyl-prolyl cis-trans isomerase domain||Cyclophilin-type peptidyl-prolyl cis-trans isomerase, conserved site||Cyclophilin-like domain||Cyclophilin-type peptidyl-prolyl cis-trans isomerase
OS05G0104000	osa-miR1846a-5p	FH14	Formin, FH2 domain
OS05G0104200	osa-miR818a,osa-miR1436	-	Leucine-rich repeat
OS05G0106000	osa-miR5161	-	Zinc finger C2H2-type/integrase DNA-binding domain||Zinc finger, C2H2||Zinc finger, C2H2-like
OS05G0106700	osa-miR5825	-	Transcription factor BREVIS RADIX, N-terminal domain||Zinc finger, FYVE-related||Brevis radix (BRX) domain||Zinc finger, RING/FYVE/PHD-type||Zinc finger, FYVE/PHD-type||FYVE zinc finger||Regulator of chromosome condensation, RCC1||Regulator of chromosome condensation 1/beta-lactamase-inhibitor protein II
OS05G0107600	osa-miR535-5p	-	AAA+ ATPase domain||ABC transporter-like||ABC transporter type 1, transmembrane domain||ABC transporter, conserved site||P-loop containing nucleoside triphosphate hydrolase
OS05G0108400	osa-miR1873	-	Protein of unknown function DUF868, plant
OS05G0108600	osa-miR1441	-	Cysteine peptidase, histidine active site||Peptidase C1A, papain||Cysteine peptidase, cysteine active site||Cysteine peptidase, asparagine active site||Proteinase inhibitor I29, cathepsin propeptide||Peptidase C1A, papain C-terminal
OS05G0109600	osa-miR5157a-3p	-	Armadillo-like helical||Pumilio RNA-binding repeat||Nucleic acid binding NABP||Armadillo-type fold
OS05G0110300	osa-miR815a	-	NAD(P)-binding domain
OS05G0113400	osa-miR2100-5p	ADF7	-||Actin-binding, cofilin/tropomyosin type||ADF-H/Gelsolin-like domain
OS05G0114100	osa-miR1871	-	Inositol polyphosphate-related phosphatase||Endonuclease/exonuclease/phosphatase
OS05G0115100	novel_3	-	Protein of unknown function DUF1635
OS05G0115500	osa-miR166g-5p	-	Actin cross-linking||Protein of unknown function DUF569
OS05G0115900	osa-miR1869	-	Glycoside hydrolase, catalytic domain||Glycoside hydrolase family 20, catalytic core||Beta-hexosaminidase, eukaryotic type, N-terminal||Chitobiase/beta-hexosaminidase domain 2-like||Glycoside hydrolase, superfamily||Beta-hexosaminidase subunit alpha/beta
OS05G0117600	osa-miR1436	-	E3 UFM1-protein ligase 1
OS05G0121000	osa-miR815a	-	Protein of unknown function DUF1218
OS05G0121200	osa-miR162a	-	Integral membrane protein TerC, riboswitch-linked||Integral membrane protein TerC
OS05G0121600	osa-miR172b,osa-miR172c,osa-miR172a	-	AP2-like ethylene-responsive transcription factor||AP2/ERF domain||DNA-binding domain
OS05G0121700	osa-miR6248,osa-miR1439,osa-miR1850.1	-	DNA recombination/repair protein RecA/RadB, ATP-binding domain||AAA+ ATPase domain||DNA recombination and repair protein, RecA-like||P-loop containing nucleoside triphosphate hydrolase||DNA repair protein RAD51 homologue 2||DNA recombination and repair protein Rad51, C-terminal
OS05G0123100	osa-miR172d-5p	-	Glycosyl transferase, family 43||Nucleotide-diphospho-sugar transferases
OS05G0124000	osa-miR5794	-	Ankyrin repeat||Ankyrin repeat-containing domain
OS05G0125000	novel_3	SIZ1	E3 SUMO-protein ligase SIZ1, plant||Zinc finger, FYVE/PHD-type||SAP domain||Zinc finger, MIZ-type||Zinc finger, RING/FYVE/PHD-type||Zinc finger, PHD-type, conserved site||Zinc finger, PHD-finger||Zinc finger, PHD-type
OS05G0125500	osa-miR1439	-	Acyl-CoA dehydrogenase, conserved site||Acyl-CoA dehydrogenase/oxidase C-terminal||Acyl-CoA oxidase/dehydrogenase, central domain||Acyl-CoA dehydrogenase/oxidase, N-terminal||Acyl-CoA dehydrogenase/oxidase, N-terminal and middle domain
OS05G0127200	osa-miR818a	-	C2 domain||EF-hand domain pair||Phosphoinositide phospholipase C||Phospholipase C, phosphoinositol-specific, EF-hand-like||Phospholipase C, phosphatidylinositol-specific , X domain||Phospholipase C, phosphatidylinositol-specific, Y domain||PLC-like phosphodiesterase, TIM beta/alpha-barrel domain
OS05G0127500	osa-miR5788,osa-miR818a,novel_3,osa-miR1436	-	Isopenicillin N synthase||Isopenicillin N synthase-like||Non-haem dioxygenase N-terminal domain||Oxoglutarate/iron-dependent dioxygenase
OS05G0128000	osa-miR1846a-3p	-	Myb-like domain||C2H2- zinc finger protein family
OS05G0129700	osa-miR1857-5p,osa-miR5161	OSH71	-||Homeobox KN domain||Homeobox, conserved site||Homeobox domain
OS05G0130400	osa-miR5542	-	Protein of unknown function DUF247, plant
OS05G0132100	osa-miR1436	-	AMP-binding, conserved site||AMP-dependent synthetase/ligase
OS05G0132500	osa-miR2100-5p	-	GDP-fucose protein O-fucosyltransferase
OS05G0134700	osa-miR2905	-	Peroxidases heam-ligand binding site||Haem peroxidase, plant/fungal/bacterial||Peroxidase, active site||Plant peroxidase||Haem peroxidase
OS05G0136900	osa-miR156k,osa-miR812a	-	Chloramphenicol acetyltransferase-like domain
OS05G0140600	osa-miR1876	-	Tudor-like, plant||Agenet-like domain
OS05G0141000	osa-miR1436	-	Armadillo-type fold
OS05G0141100	osa-miR3981-3p,osa-miR818a	-	Domain of unknown function DUF1084
OS05G0141200	osa-miR3981-3p	-	Armadillo-type fold
OS05G0141400	osa-miR1436	-	tRNA (guanine-N1-)-methyltransferase, N-terminal||tRNA/rRNA methyltransferase, SpoU||Alpha/beta knot methyltransferases
OS05G0144400	osa-miR1436,osa-miR156k	BSL1	Kelch-type beta propeller||Serine/threonine-specific protein phosphatase/bis(5-nucleosyl)-tetraphosphatase||Metallo-dependent phosphatase-like||Phosphoesterase domain||Serine/threonine protein phosphatase, BSU1
OS05G0146100	osa-miR6253	-	Trypsin-like cysteine/serine peptidase domain||PDZ domain
OS05G0146900	osa-miR6248	-	Trypsin-like cysteine/serine peptidase domain||PDZ domain
OS05G0148600	osa-miR437,osa-miR1436	-	Na+/H+ exchanger NHX -type, plants||Cation/H+ exchanger, CPA1 family||Cation/H+ exchanger||Na+/H+ exchanger
OS05G0149300	osa-miR1436,osa-miR818a	-	Oxoglutarate/iron-dependent dioxygenase||Isopenicillin N synthase-like
OS05G0149500	osa-miR6248	-	Lipopolysaccharide-modifying protein
OS05G0149600	osa-miR167e-3p	-	Cullin protein, neddylation domain||Cullin, conserved site||Cullin, N-terminal||Cullin homology||Winged helix-turn-helix DNA-binding domain
OS05G0150500	osa-miR393a	-	F-box domain||Leucine-rich repeat, cysteine-containing subtype
OS05G0150600	osa-miR1854-5p	-	DNA helicase, ATP-dependent, RecQ type||Helicase, superfamily 1/2, ATP-binding domain||DNA/RNA helicase, DEAD/DEAH box type, N-terminal||P-loop containing nucleoside triphosphate hydrolase||Winged helix-turn-helix DNA-binding domain||Ubiquitin-associated/translation elongation factor EF1B, N-terminal, eukaryote||Helicase, C-terminal
OS05G0152600	osa-miR818a,osa-miR1436	-	SIAH-type domain||E3 ubiquitin-protein ligase SINA like||Zinc finger, SIAH-type||Zinc finger, RING/FYVE/PHD-type||Seven-in-absentia protein, TRAF-like domain
OS05G0153000	osa-miR156k	-	ADF-H/Gelsolin-like domain||Gelsolin domain||Villin-1, plant
OS05G0153300	osa-miR818a	-	Lipase, class 3||Alpha/Beta hydrolase fold
OS05G0154800	osa-miR2864.2	-	U1 small nuclear ribonucleoprotein A/U2 small nuclear ribonucleoprotein B''||RNA recognition motif domain||Nucleotide-binding, alpha-beta plait
OS05G0155300	osa-miR815a	-	NIF system FeS cluster assembly, NifU, C-terminal||HIRA-interacting protein 5||NIF system FeS cluster assembly, NifU-like scaffold, N-terminal
OS05G0155700	osa-miR1432-5p	-	Protein of unknown function DUF1624
OS05G0156800	osa-miR3981-5p,osa-miR1862e,osa-miR5788,osa-miR810a,osa-miR1862d,osa-miR1439	-	Pleckstrin homology-like domain
OS05G0158400	osa-miR5827	-	Trypsin-like cysteine/serine peptidase domain
OS05G0158500	osa-miR5337a,osa-miR5337b	-	Peptidase S10, serine carboxypeptidase, active site||Alpha/Beta hydrolase fold||Peptidase S10, serine carboxypeptidase
OS05G0160300	osa-miR5517	-	Bifunctional inhibitor/plant lipid transfer protein/seed storage helical domain
OS05G0160800	osa-miR1436	-	DNA polymerase alpha/epsilon, subunit B||DNA polymerase epsilon, subunit B
OS05G0161400	osa-miR1436	-	Trypsin-like cysteine/serine peptidase domain||PDZ domain
OS05G0163000	osa-miR1432-5p	-	DALR anticodon binding||Aminoacyl-tRNA synthetase, class I, conserved site||Aminoacyl-tRNA synthetase, class 1a, anticodon-binding||Rossmann-like alpha/beta/alpha sandwich fold||Arginyl tRNA synthetase N-terminal domain||Arginine-tRNA ligase, class Ia
OS05G0163400	osa-miR172b	-	Zinc finger, RING-type||Zinc finger, RING/FYVE/PHD-type
OS05G0168300	osa-miR172d-5p	-	HAD-like domain
OS05G0169300	osa-miR1439,novel_3,osa-miR1436	-	EGF-like, alliinase||Pyridoxal phosphate-dependent transferase, major region, subdomain 1||Pyridoxal phosphate-dependent transferase||Pyridoxal phosphate-dependent transferase, major region, subdomain 2||Allinase, C-terminal
OS05G0170700	osa-miR5144-5p	-	Leucine-rich repeat||Leucine-rich repeat-containing N-terminal, type 2
OS05G0171000	osa-miR812g,osa-miR812p,osa-miR812s,osa-miR6249a	-	Phospholipase D family||C2 domain||Phospholipase D, plant||Phospholipase D/Transphosphatidylase||Phospholipase D, C-terminal
OS05G0171300	osa-miR1436	-	Mitochondrial carrier protein||Mitochondrial carrier domain||Mitochondrial substrate/solute carrier
OS05G0171900	osa-miR3981-3p,osa-miR3981-5p	-	Glyoxalase/fosfomycin resistance/dioxygenase domain||Glyoxalase/Bleomycin resistance protein/Dihydroxybiphenyl dioxygenase||Glyoxalase-like domain
OS05G0172300	osa-miR167d-3p,novel_4	-	Domain of unknown function DUF632||Domain of unknown function DUF630
OS05G0176500	osa-miR5810,osa-miR437,osa-miR1437b-5p,osa-miR5161	-	ATPase assembly factor ATP10, mitochondria
OS05G0178300	osa-miR1439	-	Cysteine-rich transmembrane CYSTM domain
OS05G0182201	osa-miR2098-3p	-	Phosphoribosyltransferase domain||Phosphoribosyltransferase-like||Hypoxanthine phosphoribosyl transferase
OS05G0187100	novel_3	HXK7	Hexokinase, N-terminal||Hexokinase, C-terminal||-
OS05G0188500	osa-miR1846d-3p	-	Armadillo-type fold||Stromalin conservative domain||Armadillo-like helical
OS05G0190300	osa-miR5799	-	HAD-like domain||Vegetative storage protein/acid phosphatase||Acid phosphatase (Class B)
OS05G0191500	osa-miR399k	-	Acid phosphatase (Class B)
OS05G0191700	osa-miR6248	-	Acid phosphatase (Class B)||HAD-like domain
OS05G0196100	novel_3	-	ABC transporter-like||P-loop containing nucleoside triphosphate hydrolase||ABC transporter type 1, transmembrane domain||ABC transporter, conserved site||AAA+ ATPase domain
OS05G0196200	osa-miR2275c	-	Alpha/Beta hydrolase fold
OS05G0196500	novel_4	JMJ703	FY-rich, C-terminal||Zinc finger, C5HC2-type||Transcription factor jumonji, JmjN||JmjC domain||FY-rich, N-terminal
OS05G0204900	osa-miR5161	-	Tetratricopeptide-like helical||PPP domain||Phosphoesterase domain||Tetratricopeptide repeat-containing domain||Tetratricopeptide TPR1||Serine/threonine-specific protein phosphatase/bis(5-nucleosyl)-tetraphosphatase||Metallo-dependent phosphatase-like||Tetratricopeptide repeat||Serine/threonine protein phosphatase 5
OS05G0207900	osa-miR1436	-	Peptidase C48, SUMO/Sentrin/Ubl1
OS05G0209600	osa-miR1436,osa-miR1439	-	Lipase, GDSL||SGNH hydrolase-type esterase domain
OS05G0210400	osa-miR437	-	Lipase, GDSL||SGNH hydrolase-type esterase domain
OS05G0210600	osa-miR394	-	Tetratricopeptide-like helical||Tetratricopeptide repeat||Tetratricopeptide repeat-containing domain
OS05G0211100	osa-miR1848	-	Cytochrome P450, conserved site||Cytochrome P450, E-class, group IV||Cytochrome P450
OS05G0212100	osa-miR1848,osa-miR444a-3p.2	-	Pentatricopeptide repeat||Tetratricopeptide-like helical
OS05G0215000	osa-miR1861d,osa-miR1862f,osa-miR1862a	BURP1	BURP domain
OS05G0215600	osa-miR5819	-	Protein of unknown function DUF2358
OS05G0217800	osa-miR1861d	BURP2	BURP domain
OS05G0218001	osa-miR171f-5p	-	Myb/SANT-like domain
OS05G0220600	osa-miR1436,osa-miR818a	-	Peptidase S54, rhomboid||Peptidase S54, rhomboid domain
OS05G0224800	osa-miR1426	-	S-adenosyl-L-methionine-dependent methyltransferase-like||DNA methylase, C-5 cytosine-specific, conserved site||C-5 cytosine methyltransferase
OS05G0228000	osa-miR812s,osa-miR812a	-	Nucleoside phosphorylase domain||Nucleoside phosphorylase
OS05G0228400	osa-miR529b	-	Myc-type, basic helix-loop-helix (bHLH) domain
OS05G0230900	osa-miR1436	-	Glyoxalase I||Glyoxalase I, conserved site||Glyoxalase/fosfomycin resistance/dioxygenase domain||Glyoxalase/Bleomycin resistance protein/Dihydroxybiphenyl dioxygenase
OS05G0231100	osa-miR2905	-	Protein kinase domain||Concanavalin A-like lectin/glucanase, subgroup||Serine/threonine- / dual specificity protein kinase, catalytic domain||Serine/threonine-protein kinase, active site||Protein kinase-like domain||Protein kinase, ATP binding site
OS05G0232500	osa-miR1436	-	Ubiquitin-conjugating enzyme, E2||Ubiquitin-conjugating enzyme/RWD-like
OS05G0235300	osa-miR5148a,osa-miR1439,osa-miR818a,osa-miR1436	TOR	PIK-related kinase, FAT||Phosphatidylinositol 3/4-kinase, conserved site||PIK-related kinase||Phosphatidylinositol 3-/4-kinase, catalytic domain||Armadillo-type fold||Protein kinase-like domain||Armadillo-like helical||Rapamycin-binding domain||PIK-related kinase, FATC
OS05G0238400	novel_4	-	Late embryogenesis abundant protein, LEA-14
OS05G0239400	osa-miR3979-5p	-	Armadillo-like helical
OS05G0241100	osa-miR5542	-	Aminoacyl-tRNA synthetase, class I, conserved site||Aminoacyl-tRNA synthetase, class Ia||Rossmann-like alpha/beta/alpha sandwich fold||Valyl/Leucyl/Isoleucyl-tRNA synthetase, editing domain
OS05G0241200	osa-miR2121a	-	Triose phosphate/phosphoenolpyruvate translocator||Triose-phosphate transporter domain
OS05G0244600	osa-miR5788,osa-miR1846a-3p,osa-miR3981-5p,osa-miR5522,osa-miR818a	-	Nucleic acid-binding, OB-fold
OS05G0247900	osa-miR167h-3p	-	SNF2-related||P-loop containing nucleoside triphosphate hydrolase||Helicase, superfamily 1/2, ATP-binding domain||Helicase, C-terminal
OS05G0249800	osa-miR6248	-	Domain of unknown function DUF1618
OS05G0251900	osa-miR5523	-	Oligopeptide transporter, OPT superfamily
OS05G0252000	osa-miR1436,osa-miR2121a,osa-miR815a	YSL4	Oligopeptide transporter, OPT superfamily
OS05G0256000	osa-miR437	-	WD40 repeat, conserved site||WD40-repeat-containing domain||WD40 repeat||WD40/YVTN repeat-like-containing domain||G-protein beta WD-40 repeat||Eukaryotic translation initiation factor 3 subunit I
OS05G0256350	osa-miR3979-5p	-	Domain of unknown function DUF659||Zinc finger, BED-type predicted||Ribonuclease H-like domain
OS05G0256500	osa-miR5150-3p,osa-miR2055	-	Serine-threonine/tyrosine-protein kinase catalytic domain||Protein kinase domain||Serine/threonine- / dual specificity protein kinase, catalytic domain||Serine/threonine-protein kinase, active site||Protein kinase-like domain||Concanavalin A-like lectin/glucanase, subgroup
OS05G0261700	osa-miR812a	-	Leucine-rich repeat
OS05G0263100	osa-miR3979-5p	-	Serine-threonine/tyrosine-protein kinase catalytic domain||Protein kinase domain||Serine/threonine- / dual specificity protein kinase, catalytic domain||Serine/threonine-protein kinase, active site||Protein kinase-like domain||Concanavalin A-like lectin/glucanase, subgroup
OS05G0264200	osa-miR1441	-	Protein of unknown function DUF639
OS05G0267100	osa-miR3979-5p	-	CRAL/TRIO, N-terminal domain||CRAL-TRIO domain
OS05G0267800	osa-miR818a,osa-miR5788,osa-miR812n-5p	-	CRAL/TRIO, N-terminal domain||CRAL-TRIO domain
OS05G0267850	osa-miR396g	-	Chloramphenicol acetyltransferase-like domain
OS05G0268500	osa-miR1436,osa-miR2867-3p,osa-miR812a,osa-miR812s,osa-miR164a,osa-miR5799	-	Alpha/Beta hydrolase fold||Peptidase S10, serine carboxypeptidase, active site||Peptidase S10, serine carboxypeptidase
OS05G0269500	osa-miR1436,osa-miR3981-5p,osa-miR3981-3p	HAP2A	Generative cell specific-1, HAP2-GCS1
OS05G0275700	osa-miR1428e-3p,osa-miR1428b	-	Zinc finger, RING-type||Zinc finger, RING/FYVE/PHD-type||Zinc finger, RING-type, conserved site||Pex, N-terminal||Zinc finger, C3HC4 RING-type
OS05G0278500	osa-miR1848	-	Chloramphenicol acetyltransferase-like domain
OS05G0279300	osa-miR444d.3	-	Pseudouridine synthase I, TruA, N-terminal||Pseudouridine synthase I, TruA||Pseudouridine synthase I, TruA, alpha/beta domain||Pseudouridine synthase, catalytic domain
OS05G0279400	osa-miR6248	-	Zinc finger, C2H2-like||Zinc finger, C2H2||Zinc finger, RING-type
OS05G0293500	osa-miR5537,osa-miR812s,osa-miR812a,osa-miR5799,osa-miR812o-3p,osa-miR6248	-	Pectin lyase fold||Pectate lyase/Amb allergen||Pectin lyase fold/virulence factor
OS05G0295700	osa-miR1848	-	Mitochondrial matrix Mmp37
OS05G0300700	osa-miR1436	-	Zinc-finger domain of monoamine-oxidase A repressor R1||WHIM1 domain
OS05G0301700	osa-miR1439,osa-miR5161	-	Cytochrome c-like domain||Cytochrome c1||Cytochrome c1, transmembrane anchor, C-terminal
OS05G0302300	osa-miR5145	-	FY-rich, N-terminal||JmjC domain||Transcription factor jumonji, JmjN||Zinc finger, C5HC2-type||FY-rich, C-terminal
OS05G0302700	osa-miR1436	-	Mitochondrial substrate/solute carrier||Mitochondrial carrier domain||Adenine nucleotide translocator 1||Mitochondrial carrier protein
OS05G0305100	osa-miR1436,osa-miR6248	-	Transcription factor TFIIB||Transcription factor IIIB subunit Brf1||Brf1-like TBP-binding||Transcription factor TFIIB, cyclin-like domain
OS05G0305700	osa-miR169h,osa-miR169f.1,osa-miR1436	-	Protein of unknown function DUF3755
OS05G0310800	osa-miR1860-5p	-	Longin-like domain||Mu homology domain||Coatomer delta subunit
OS05G0311000	osa-miR1425-5p	-	Coatomer delta subunit||Mu homology domain||Longin-like domain
OS05G0313500	osa-miR2121a	-	Alcohol dehydrogenase GroES-like||Alcohol dehydrogenase superfamily, zinc-type||Quinone oxidoreductase/zeta-crystallin, conserved site||Alcohol dehydrogenase, C-terminal||GroES (chaperonin 10)-like||NAD(P)-binding domain||Polyketide synthase, enoylreductase
OS05G0319200	osa-miR818a	-	Pyridoxal phosphate-dependent transferase, major region, subdomain 2||Aminotransferases, class-I, pyridoxal-phosphate-binding site||Pyridoxal phosphate-dependent transferase, major region, subdomain 1||Pyridoxal phosphate-dependent transferase||Aminotransferase, class I/classII
OS05G0320100	osa-miR2121a	-	F-box domain
OS05G0321900	osa-miR1439,osa-miR1436	-	DNA-binding WRKY
OS05G0322900	osa-miR815a	-	DNA-binding WRKY
OS05G0329400	osa-miR3979-5p	-	Bifunctional inhibitor/plant lipid transfer protein/seed storage helical domain
OS05G0333500	osa-miR166k-5p	-	DnaJ domain||Chaperone DnaJ, C-terminal||DnaJ domain, conserved site||HSP40/DnaJ peptide-binding||Heat shock protein DnaJ, cysteine-rich domain||Chaperone DnaJ
OS05G0334000	osa-miR166k-5p	-	DnaJ domain||DnaJ domain, conserved site||Chaperone DnaJ, C-terminal||HSP40/DnaJ peptide-binding||Heat shock protein DnaJ, cysteine-rich domain||Chaperone DnaJ
OS05G0334400	osa-miR1863b,osa-miR1436,osa-miR166k-5p	-	Chaperone DnaJ||Heat shock protein DnaJ, cysteine-rich domain||Saposin-like type B, 1||DnaJ domain||HSP40/DnaJ peptide-binding||Saposin B||Chaperone DnaJ, C-terminal||DnaJ domain, conserved site
OS05G0338900	osa-miR1881,osa-miR812a,osa-miR1439	-	Major facilitator superfamily domain||Proton-dependent oligopeptide transporter family
[truncated: 1,997 more rows]
