# Supplementary material for: Modification of Gene Expression, DNA Methylation and Small RNAs Expression in Rice Plants under In Vitro Culture
Source: MDPI journal article supplement (doi:10.3390/agronomy12071675), 2022-07-14
Supplement: s1 [file s1 › Table_S6.xlsx]

## Sheet: mirna_up gene_down
ID	Fold-Change(NON vs CK)	miRNA	seq	NONreadcount	W_Treadcount		Description
Os.53228.1.S1_at	-1.59	osa-miR164e	UGGAGAAGCAGGGCACGUGAG	216	26	3.05445	NAC domain
Os.4707.1.S1_at	-1.61	osa-miR814a	CACUUCAUAGUACAACGAAUCU	9	2	2.16993	Citrate transporter-like domain
OsAffx.28364.1.S1_x_at	-2.11	osa-miR814a	CACUUCAUAGUACAACGAAUCU	9	2	2.16993	Glucose/Sorbosone dehydrogenase||Six-bladed beta-propeller, TolB-like||Soluble quinoprotein glucose/sorbosone dehydrogenase
OsAffx.28364.1.S1_at	-2.03	osa-miR814a	CACUUCAUAGUACAACGAAUCU	9	2	2.16993	Glucose/Sorbosone dehydrogenase||Six-bladed beta-propeller, TolB-like||Soluble quinoprotein glucose/sorbosone dehydrogenase
Os.18356.2.S1_at	-1.51	osa-miR814a	CACUUCAUAGUACAACGAAUCU	9	2	2.16993	Purine permease, plant
Os.55682.1.S1_at	-1.68	osa-miR1429-3p	GUUGCACGGGUUUGUAUGUUG	31	7	2.14684	no results from NuoHe
Os.49627.2.S1_x_at	-1.62	osa-miR528-5p	UGGAAGGGGCAUGCAGAGGAG	8696	2155	2.01266	Multicopper oxidase, type 1||Multicopper oxidase, type 2||Multicopper oxidase, copper-binding site||L-ascorbate oxidase, plants||Multicopper oxidase, type 3
Os.51814.1.S1_at	-1.8	osa-miR5821	UGGACGGAGCGAUGGUGGGCG	4	1	2	NAD(P)-binding domain||NAD-dependent epimerase/dehydratase
Os.27624.1.S1_at	-1.54	osa-miR5337a	AAAUUACUUGUCGUUCUAGCU	150	44	1.76939	no results from NuoHe
Os.8642.4.S1_x_at	-1.78	osa-miR5337a	AAAUUACUUGUCGUUCUAGCU	150	44	1.76939	Protein kinase, ATP binding site||PAS domain||Serine/threonine- / dual specificity protein kinase, catalytic domain||Serine/threonine-protein kinase, active site||Protein kinase-like domain||Protein kinase domain||PAS-associated, C-terminal||PAC motif
Os.8642.1.S1_a_at	-1.74	osa-miR5337a	AAAUUACUUGUCGUUCUAGCU	150	44	1.76939	Protein kinase, ATP binding site||PAS domain||Serine/threonine- / dual specificity protein kinase, catalytic domain||Serine/threonine-protein kinase, active site||Protein kinase-like domain||Protein kinase domain||PAS-associated, C-terminal||PAC motif
Os.51049.1.S1_at	-1.63	osa-miR397a	UCAUUGAGUGCAGCGUUGAUG	511	221	1.20928	Multicopper oxidase, type 2||-||Multicopper oxidase, type 1||Multicopper oxidase, type 3||Multicopper oxidase, copper-binding site
Os.25570.1.S1_at	-1.51	osa-miR156l-5p	CGACAGAAGAGAGUGAGCAUA	179	86	1.05755	Concanavalin A-like lectin/glucanase, subgroup||Serine/threonine- / dual specificity protein kinase, catalytic domain||Serine/threonine-protein kinase, active site||Protein kinase-like domain||Protein kinase, ATP binding site||Protein kinase domain||Seri
Os.51049.1.S1_at	-1.63	osa-miR397b	UUAUUGAGUGCAGCGUUGAUG	789	394	1.00183	Multicopper oxidase, type 2||-||Multicopper oxidase, type 1||Multicopper oxidase, type 3||Multicopper oxidase, copper-binding site
Os.11947.1.S1_a_at	-1.5	osa-miR5079a	UUUGGAUCUGUUAUUUUGGUAU	4	2	1	Protein kinase domain||UbiB domain||Protein kinase-like domain

## Sheet: mirna_down gene_down
ID	Fold-Change(NON vs CK)	miRNA	seq	NONreadcount	W_Treadcount		Description
Os.3426.1.S1_at	-1.5	osa-miR169f.1	UAGCCAAGGAUGACUUGCCUA	3	6	-1	CCAAT-binding transcription factor, subunit B||CCAAT-binding factor, conserved site
Os.11961.1.S1_at	-1.88	osa-miR5490	UUGGAUUUUUAUUUAGGACGG	1	2	-1	no results from NuoHe
Os.49627.2.S1_x_at	-1.62	osa-miR1848	CCUCGCCGGCGCGCGCGUGCA	1	2	-1	Multicopper oxidase, type 1||Multicopper oxidase, type 2||Multicopper oxidase, copper-binding site||L-ascorbate oxidase, plants||Multicopper oxidase, type 3
Os.21286.1.S1_at	-7.66	osa-miR1849	UAUCGUAUCCUAGGUUGGUUU	5	10	-1	Pseudouridine synthase/archaeosine transglycosylase||S-adenosyl-L-methionine-dependent methyltransferase-like||PUA-like domain||RNA (C5-cytosine) methyltransferase||Bacterial Fmu (Sun)/eukaryotic nucleolar NOL1/Nop2p, conserved site||Bacterial Fmu (Sun)/e
Os.27811.1.S1_at	-1.66	osa-miR817	UCCAACUUGAGGCCCGAUUGA	1	2	-1	Ankyrin repeat-containing domain||PGG domain||Caskin/Ankyrin repeat-containing protein||Ankyrin repeat
Os.39617.1.S1_at	-1.74	osa-miR1848	CCUCGCCGGCGCGCGCGUGCA	1	2	-1	ABC-2 type transporter||AAA+ ATPase domain||ABC transporter-like||ABC transporter, conserved site||P-loop containing nucleoside triphosphate hydrolase
Os.3426.1.S1_at	-1.5	osa-miR169h	UAGCCAAGGAUGACUUGCCUG	65	133	-1.03291	CCAAT-binding transcription factor, subunit B||CCAAT-binding factor, conserved site
Os.7929.4.S1_x_at	-1.78	osa-miR435	UUAUCCGGUAUUGGAGUUGA	19	41	-1.10962	no results from NuoHe
Os.7929.5.S1_at	-2.37	osa-miR435	UUAUCCGGUAUUGGAGUUGA	19	41	-1.10962	no results from NuoHe
Os.7929.2.S1_a_at	-1.72	osa-miR435	UUAUCCGGUAUUGGAGUUGA	19	41	-1.10962	no results from NuoHe
Os.2371.1.S1_at	-1.64	osa-miR1850.1	UGGAAAGUUGGGAGAUUGGGG	4646	10900	-1.23027	Haem peroxidase, animal||Haem peroxidase
Os.15738.1.S1_at	-1.57	osa-miR1850.1	UGGAAAGUUGGGAGAUUGGGG	4646	10900	-1.23027	Phosphoesterase domain||Purple acid phosphatase-like, N-terminal||Purple acid phosphatase, N-terminal||Iron/zinc purple acid phosphatase-like C-terminal domain||Metallo-dependent phosphatase-like
Os.3426.1.S1_at	-1.5	osa-miR169a	CAGCCAAGGAUGACUUGCCGA	295	716	-1.27924	CCAAT-binding transcription factor, subunit B||CCAAT-binding factor, conserved site
Os.10335.1.S1_at	-1.68	osa-miR437	AAAGUUAGAGAAGUUUGACUU	8	21	-1.39232	Protein of unknown function DUF247, plant
Os.20063.2.S1_at	-8.6	osa-miR437	AAAGUUAGAGAAGUUUGACUU	8	21	-1.39232	no results from NuoHe
Os.15801.1.S1_x_at	-1.83	osa-miR437	AAAGUUAGAGAAGUUUGACUU	8	21	-1.39232	Nucleoside phosphatase GDA1/CD39
Os.12282.1.S1_a_at	-1.8	osa-miR437	AAAGUUAGAGAAGUUUGACUU	8	21	-1.39232	Terpenoid cyclases/protein prenyltransferase alpha-alpha toroid||Squalene cyclase||Terpene synthase, conserved site
Os.3426.1.S1_at	-1.5	osa-miR169b	CAGCCAAGGAUGACUUGCCGG	925	2488	-1.42746	CCAAT-binding transcription factor, subunit B||CCAAT-binding factor, conserved site
OsAffx.21616.1.S1_s_at	-2.5	novel_3	cccgccaccggcgccgcuucc	19	52	-1.45251	DNA-binding domain||AP2/ERF domain
Os.12501.1.S1_at	-2.58	novel_3	cccgccaccggcgccgcuucc	19	52	-1.45251	GH3 auxin-responsive promoter
Os.17619.1.S1_at	-2.15	novel_3	cccgccaccggcgccgcuucc	19	52	-1.45251	Xyloglucan fucosyltransferase
Os.52493.1.A1_at	-1.54	novel_3	cccgccaccggcgccgcuucc	19	52	-1.45251	no results from NuoHe
Os.52493.1.A1_s_at	-1.57	novel_3	cccgccaccggcgccgcuucc	19	52	-1.45251	no results from NuoHe
Os.12363.1.S1_at	-1.7	novel_3	cccgccaccggcgccgcuucc	19	52	-1.45251	NAD(P)-binding domain||Glucose/ribitol dehydrogenase||Short-chain dehydrogenase/reductase SDR||Light-dependent protochlorophyllide reductase
Os.50281.1.S1_at	-1.53	novel_3	cccgccaccggcgccgcuucc	19	52	-1.45251	Formin, FH2 domain
Os.6832.1.S1_at	-1.7	osa-miR5831	UAGUCAAACUUAGAAUAGUUGGAC	1	3	-1.58496	Mannose-binding lectin
Os.27035.1.S1_s_at	-1.51	osa-miR5799	AAGACGAAUAAUCAAACGUUGGAC	1	3	-1.58496	Peptidyl-prolyl cis-trans isomerase, FKBP-type||Peptidyl-prolyl cis-trans isomerase, FKBP-type, domain||Tetratricopeptide-like helical
Os.36162.1.S1_at	-1.55	osa-miR395o	AUGAAGUGUUUGGAGGAACUC	1	3	-1.58496	Amino acid transporter, transmembrane
OsAffx.24336.1.S1_at	-2.28	osa-miR5831	UAGUCAAACUUAGAAUAGUUGGAC	1	3	-1.58496	Pyridoxal phosphate-dependent transferase, major region, subdomain 2||Pyridoxal phosphate-dependent transferase, major region, subdomain 1||Tyrosine/nicotianamine aminotransferase||Pyridoxal phosphate-dependent transferase||Aminotransferase, class I/class
OsAffx.24336.1.S1_x_at	-2.23	osa-miR5831	UAGUCAAACUUAGAAUAGUUGGAC	1	3	-1.58496	Pyridoxal phosphate-dependent transferase, major region, subdomain 2||Pyridoxal phosphate-dependent transferase, major region, subdomain 1||Tyrosine/nicotianamine aminotransferase||Pyridoxal phosphate-dependent transferase||Aminotransferase, class I/class
Os.3426.1.S1_at	-1.5	osa-miR1440b	UUUAGGAGAGUGGUAUUUGAG	3	9	-1.58496	CCAAT-binding transcription factor, subunit B||CCAAT-binding factor, conserved site
Os.52282.1.S1_at	-2.18	osa-miR1440b	UUUAGGAGAGUGGUAUUUGAG	3	9	-1.58496	Protein kinase, ATP binding site||Bulb-type lectin domain||S-receptor-like serine/threonine-protein kinase||Concanavalin A-like lectin/glucanase, subgroup||S-locus glycoprotein||Serine/threonine- / dual specificity protein kinase, catalytic domain||Prote
Os.46287.1.S1_a_at	-1.56	osa-miR1846d-3p	UAUCCGGCGCCGCAGGGAGG	1	3	-1.58496	Serine-threonine/tyrosine-protein kinase catalytic domain||Protein kinase domain||Serine/threonine- / dual specificity protein kinase, catalytic domain||Serine/threonine-protein kinase, active site||Protein kinase-like domain||Concanavalin A-like lectin/
Os.9778.1.S2_at	-1.7	osa-miR1440a	UGCUCAAAUACCACUCUCCU	3	9	-1.58496	Armadillo-like helical||Armadillo-type fold
Os.53001.1.S1_at	-1.52	osa-miR1440b	UUUAGGAGAGUGGUAUUUGAG	3	9	-1.58496	Adenylate kinase, active site lid domain||Adenylate kinase subfamily||Adenylate kinase||P-loop containing nucleoside triphosphate hydrolase||Domain of unknown function DUF1995
Os.8642.1.S1_a_at	-1.74	osa-miR5799	AAGACGAAUAAUCAAACGUUGGAC	1	3	-1.58496	Protein kinase, ATP binding site||PAS domain||Serine/threonine- / dual specificity protein kinase, catalytic domain||Serine/threonine-protein kinase, active site||Protein kinase-like domain||Protein kinase domain||PAS-associated, C-terminal||PAC motif
Os.8642.4.S1_x_at	-1.78	osa-miR5799	AAGACGAAUAAUCAAACGUUGGAC	1	3	-1.58496	Protein kinase, ATP binding site||PAS domain||Serine/threonine- / dual specificity protein kinase, catalytic domain||Serine/threonine-protein kinase, active site||Protein kinase-like domain||Protein kinase domain||PAS-associated, C-terminal||PAC motif
Os.12282.1.S1_a_at	-1.8	osa-miR1440b	UUUAGGAGAGUGGUAUUUGAG	3	9	-1.58496	Terpenoid cyclases/protein prenyltransferase alpha-alpha toroid||Squalene cyclase||Terpene synthase, conserved site
Os.12282.1.S1_a_at	-1.8	osa-miR5799	AAGACGAAUAAUCAAACGUUGGAC	1	3	-1.58496	Terpenoid cyclases/protein prenyltransferase alpha-alpha toroid||Squalene cyclase||Terpene synthase, conserved site
Os.27207.1.S1_at	-1.57	osa-miR5831	UAGUCAAACUUAGAAUAGUUGGAC	1	3	-1.58496	Chloride channel, core
Os.51658.1.S1_at	-3.94	osa-miR1427	UGCGGAACCGUGCGGUGGCGC	13	46	-1.82312	Protein of unknown function DUF295||F-box domain
OsAffx.18050.2.S1_at	-2.15	osa-miR827	UUAGAUGACCAUCAGCAAACA	22	79	-1.84435	Protein kinase domain||EGF-type aspartate/asparagine hydroxylation site||Serine/threonine- / dual specificity protein kinase, catalytic domain||Serine/threonine-protein kinase, active site||Protein kinase-like domain||Concanavalin A-like lectin/glucanase
Os.3426.1.S1_at	-1.5	osa-miR169r-5p	UAGCCAAGGAUGAUUUGCCUG	1	4	-2	CCAAT-binding transcription factor, subunit B||CCAAT-binding factor, conserved site
Os.16271.1.S1_s_at	-1.77	osa-miR812r	ACGUUAGACACGAAUUUCUACGGC	12	57	-2.24793	Bifunctional inhibitor/plant lipid transfer protein/seed storage helical domain||Plant lipid transfer protein/Par allergen
OsAffx.27248.1.S1_s_at	-1.56	osa-miR812r	ACGUUAGACACGAAUUUCUACGGC	12	57	-2.24793	Bifunctional inhibitor/plant lipid transfer protein/seed storage helical domain||Plant lipid transfer protein/Par allergen
Os.9847.1.S1_at	-1.58	osa-miR156k	UGACAGAAGAGAGAGAGCACA	83	431	-2.3765	Chloramphenicol acetyltransferase-like domain
Os.36162.1.S1_at	-1.55	osa-miR395c	GUGAAGUGUUUGGAGGAACUC	1	6	-2.58496	Amino acid transporter, transmembrane
Os.7929.4.S1_x_at	-1.78	osa-miR1319b	CCUUUAAUAUAUUAUAGGUGUCGG	1	7	-2.80735	no results from NuoHe
Os.7929.2.S1_a_at	-1.72	osa-miR1319b	CCUUUAAUAUAUUAUAGGUGUCGG	1	7	-2.80735	no results from NuoHe
Os.7929.5.S1_at	-2.37	osa-miR1319b	CCUUUAAUAUAUUAUAGGUGUCGG	1	7	-2.80735	no results from NuoHe
Os.21286.1.S1_at	-7.66	osa-miR3982-5p	GCGCUCCACGUAGGCAACAAU	1	7	-2.80735	Pseudouridine synthase/archaeosine transglycosylase||S-adenosyl-L-methionine-dependent methyltransferase-like||PUA-like domain||RNA (C5-cytosine) methyltransferase||Bacterial Fmu (Sun)/eukaryotic nucleolar NOL1/Nop2p, conserved site||Bacterial Fmu (Sun)/e
Os.47792.1.S1_at	-1.85	osa-miR159a.1	UUUGGAUUGAAGGGAGCUCUG	740	6647	-3.16711	Glycosyl hydrolase family 32, N-terminal||Glycoside hydrolase, family 32, active site||Concanavalin A-like lectin/glucanase, subgroup||Glycosyl hydrolase, five-bladed beta-propellor domain||Glycosyl hydrolase family 32, C-terminal||Glycoside hydrolase, fa
Os.25570.1.S1_at	-1.51	osa-miR159a.1	UUUGGAUUGAAGGGAGCUCUG	740	6647	-3.16711	Concanavalin A-like lectin/glucanase, subgroup||Serine/threonine- / dual specificity protein kinase, catalytic domain||Serine/threonine-protein kinase, active site||Protein kinase-like domain||Protein kinase, ATP binding site||Protein kinase domain||Seri
Os.49998.1.S1_at	-2.15	osa-miR444d.3	UUGUGGCUUUCUUGCAAGUUG	2	24	-3.58496	Phosphoenolpyruvate carboxylase, bacterial/plant-type||Pyruvate/Phosphoenolpyruvate kinase-like domain||Phosphoenolpyruvate carboxylase||Phosphoenolpyruvate carboxylase, active site
Os.33406.1.A1_x_at	-1.52	osa-miR444d.3	UUGUGGCUUUCUUGCAAGUUG	2	24	-3.58496	Phosphoenolpyruvate carboxylase, bacterial/plant-type||Pyruvate/Phosphoenolpyruvate kinase-like domain||Phosphoenolpyruvate carboxylase||Phosphoenolpyruvate carboxylase, active site
Os.11745.2.S1_at	-1.52	osa-miR444d.3	UUGUGGCUUUCUUGCAAGUUG	2	24	-3.58496	no results from NuoHe
Os.11745.1.S1_x_at	-1.72	osa-miR444d.3	UUGUGGCUUUCUUGCAAGUUG	2	24	-3.58496	no results from NuoHe

## Sheet: mirna_up gene_up
ID	Fold-Change(NON vs CK)	miRNA	seq	NONreadcount	W_Treadcount		Description
Os.53663.1.S1_at	1.56	osa-miR528-5p	UGGAAGGGGCAUGCAGAGGAG	8696	2155	2.01266	no results from NuoHe
Os.7496.1.S1_a_at	1.56	osa-miR5821	UGGACGGAGCGAUGGUGGGCG	4	1	2	Alcohol dehydrogenase superfamily, zinc-type||Alcohol dehydrogenase, zinc-type, conserved site||Alcohol dehydrogenase GroES-like||Alcohol dehydrogenase, C-terminal||GroES (chaperonin 10)-like||NAD(P)-binding domain||Polyketide synthase, enoylreductase
Os.53270.1.S1_at	1.51	osa-miR5337a	AAAUUACUUGUCGUUCUAGCU	150	44	1.76939	Protein-tyrosine phosphatase, SIW14-like||Protein-tyrosine phosphatase, dual specificity phosphatase, eukaryotic||Protein-tyrosine phosphatase-like

## Sheet: mirna_down gene_up
ID	Fold-Change(NON vs CK)	miRNA	seq	NONreadcount	W_Treadcount		Description
Os.4184.1.S1_at	2.13	osa-miR394	UUGGCAUUCUGUCCACCUCC	1	93	-6.53916	Zinc finger, Dof-type
OsAffx.29710.1.S1_x_at	1.96	osa-miR159a.1	UUUGGAUUGAAGGGAGCUCUG	740	6647	-3.16711	AAA+ ATPase domain||ABC-2 type transporter||P-loop containing nucleoside triphosphate hydrolase||ABC transporter-like
OsAffx.31993.1.S1_at	2.32	osa-miR5808	ACUAAAUCGUUUCUGAUCGUUGGA	4	17	-2.08746	Cytochrome P450, E-class, group I||Cytochrome P450||Cytochrome P450, conserved site
Os.15829.1.S1_at	1.6	osa-miR5831	UAGUCAAACUUAGAAUAGUUGGAC	1	3	-1.58496	Lipoxygenase||Lipoxygenase, C-terminal||Lipoxygenase, domain 3||PLAT/LH2 domain||Lipoxygenase, iron binding site||Lipoxygenase, plant||Lipoxygenase, conserved site
Os.6125.1.S1_at	2	osa-miR5799	AAGACGAAUAAUCAAACGUUGGAC	1	3	-1.58496	Thioredoxin-like fold||Thioredoxin, conserved site||C1-like
Os.7187.1.S1_at	1.53	osa-miR5799	AAGACGAAUAAUCAAACGUUGGAC	1	3	-1.58496	HAD-like domain||Vegetative storage protein/acid phosphatase||Acid phosphatase (Class B)
Os.8503.1.S1_at	2.61	osa-miR5831	UAGUCAAACUUAGAAUAGUUGGAC	1	3	-1.58496	no results from NuoHe
Os.6664.1.S1_at	2.08	novel_3	cccgccaccggcgccgcuucc	19	52	-1.45251	Bifunctional inhibitor/plant lipid transfer protein/seed storage helical domain
Os.6125.1.S1_at	2	osa-miR437	AAAGUUAGAGAAGUUUGACUU	8	21	-1.39232	Thioredoxin-like fold||Thioredoxin, conserved site||C1-like
Os.12400.4.S1_at	1.53	osa-miR437	AAAGUUAGAGAAGUUUGACUU	8	21	-1.39232	Transmembrane protein TauE like
Os.20063.1.S1_x_at	2.94	osa-miR437	AAAGUUAGAGAAGUUUGACUU	8	21	-1.39232	no results from NuoHe
Os.19899.1.S1_x_at	1.54	osa-miR319a-3p.2-3p	UUGGACUGAAGGGUGCUCCC	19	49	-1.36678	-
Os.8118.1.S1_at	3.25	novel_4	aagcggcgccgguggcggggg	15	35	-1.22239	Major intrinsic protein||Major intrinsic protein, conserved site||-
Os.14256.1.S1_a_at	2.03	novel_4	aagcggcgccgguggcggggg	15	35	-1.22239	Major intrinsic protein||Major intrinsic protein, conserved site||-
Os.46631.1.S1_x_at	1.57	osa-miR1320-5p	UGGAACGGAGGAAUUUUAUAG	18	41	-1.18763	Glycoside hydrolase, family 16||Xyloglucan endo-transglycosylase, C-terminal||Concanavalin A-like lectin/glucanase, subgroup
Os.32592.1.S1_at	1.62	osa-miR1848	CCUCGCCGGCGCGCGCGUGCA	1	2	-1	Rho GTPase activation protein||CRIB domain||Rho GTPase-activating protein domain
OsAffx.29710.1.S1_x_at	1.96	osa-miR1848	CCUCGCCGGCGCGCGCGUGCA	1	2	-1	AAA+ ATPase domain||ABC-2 type transporter||P-loop containing nucleoside triphosphate hydrolase||ABC transporter-like
Os.5943.1.S1_at	1.78	osa-miR2097-3p	UUCUCUUCUUCGUGUCGCAUUU	1	2	-1	NAC domain
