# Supplementary figures and images for: Modification of Gene Expression, DNA Methylation and Small RNAs Expression in Rice Plants under In Vitro Culture
Source: MDPI journal article supplement (doi:10.3390/agronomy12071675), 2022-07-14

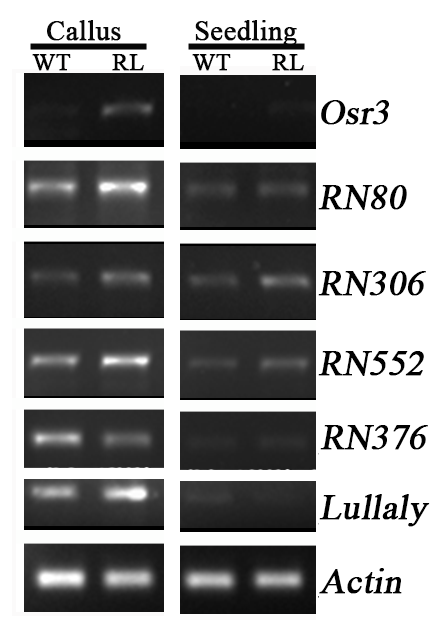

Supplement: s1 [file s1 › Figure_S1.tif]

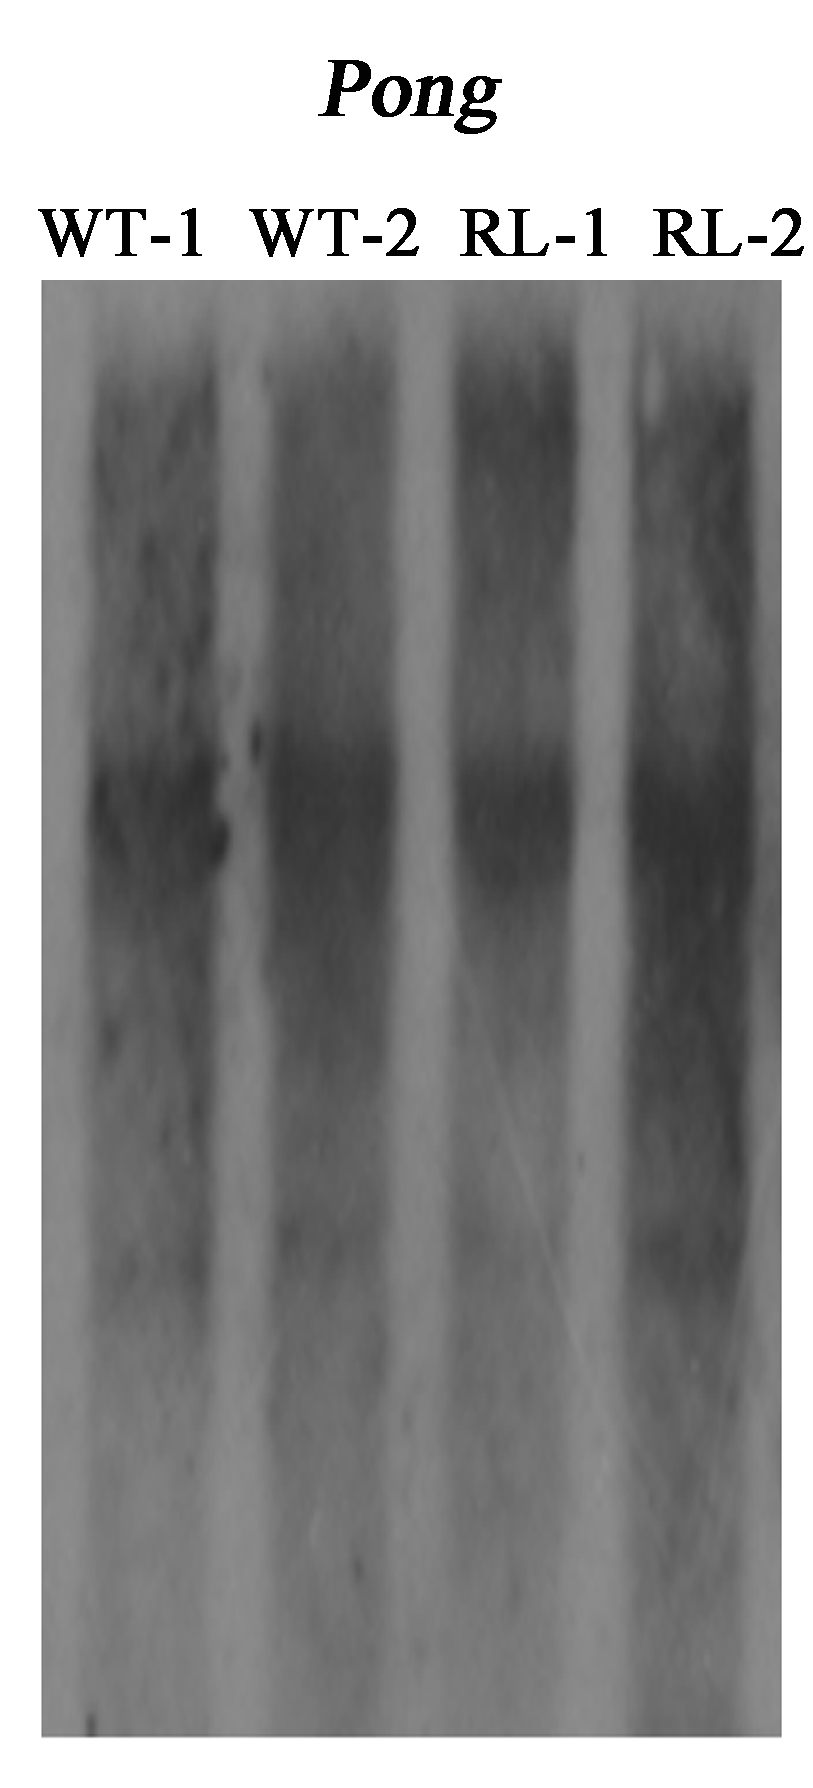

Supplement: s1 [file s1 › Figure_S2.tif]

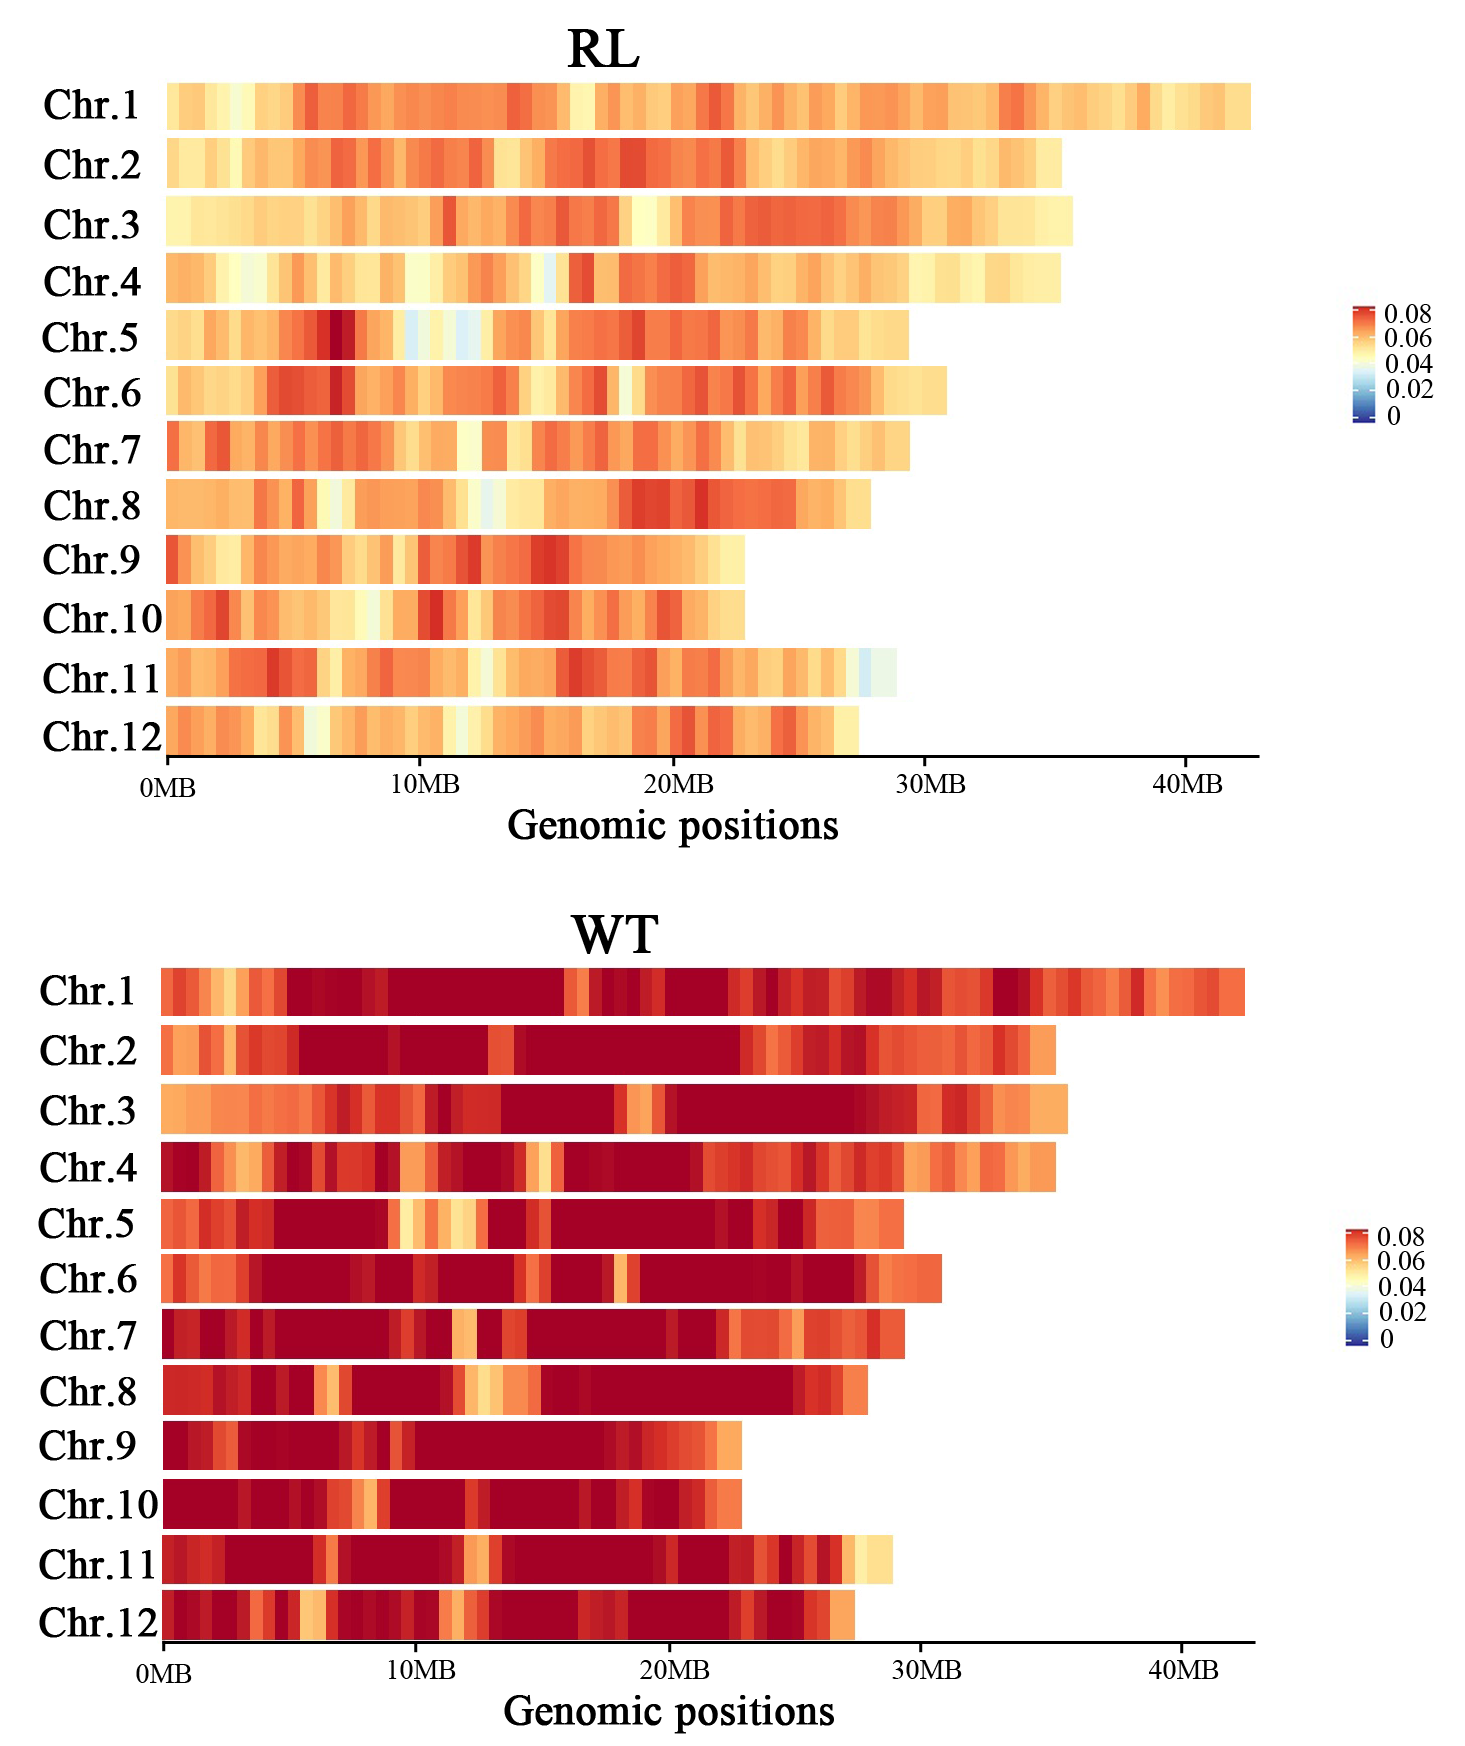

Supplement: s1 [file s1 › Figure_S3.tif]

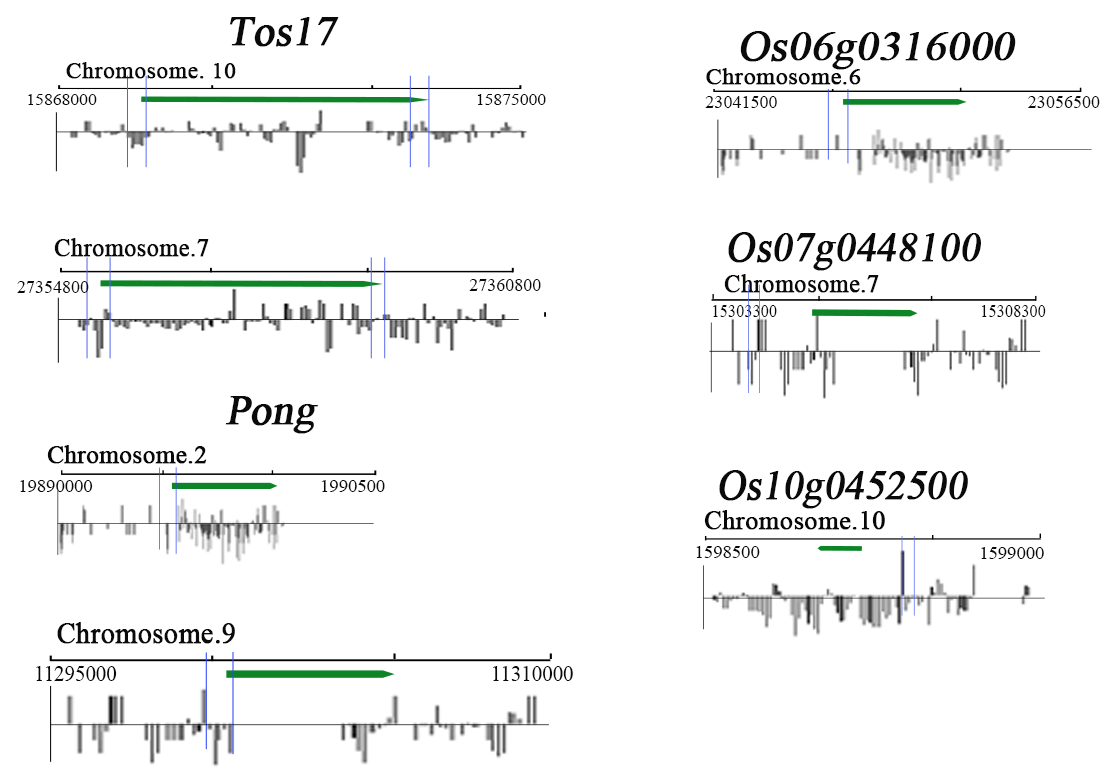

Supplement: s1 [file s1 › Figure_S4.tif]

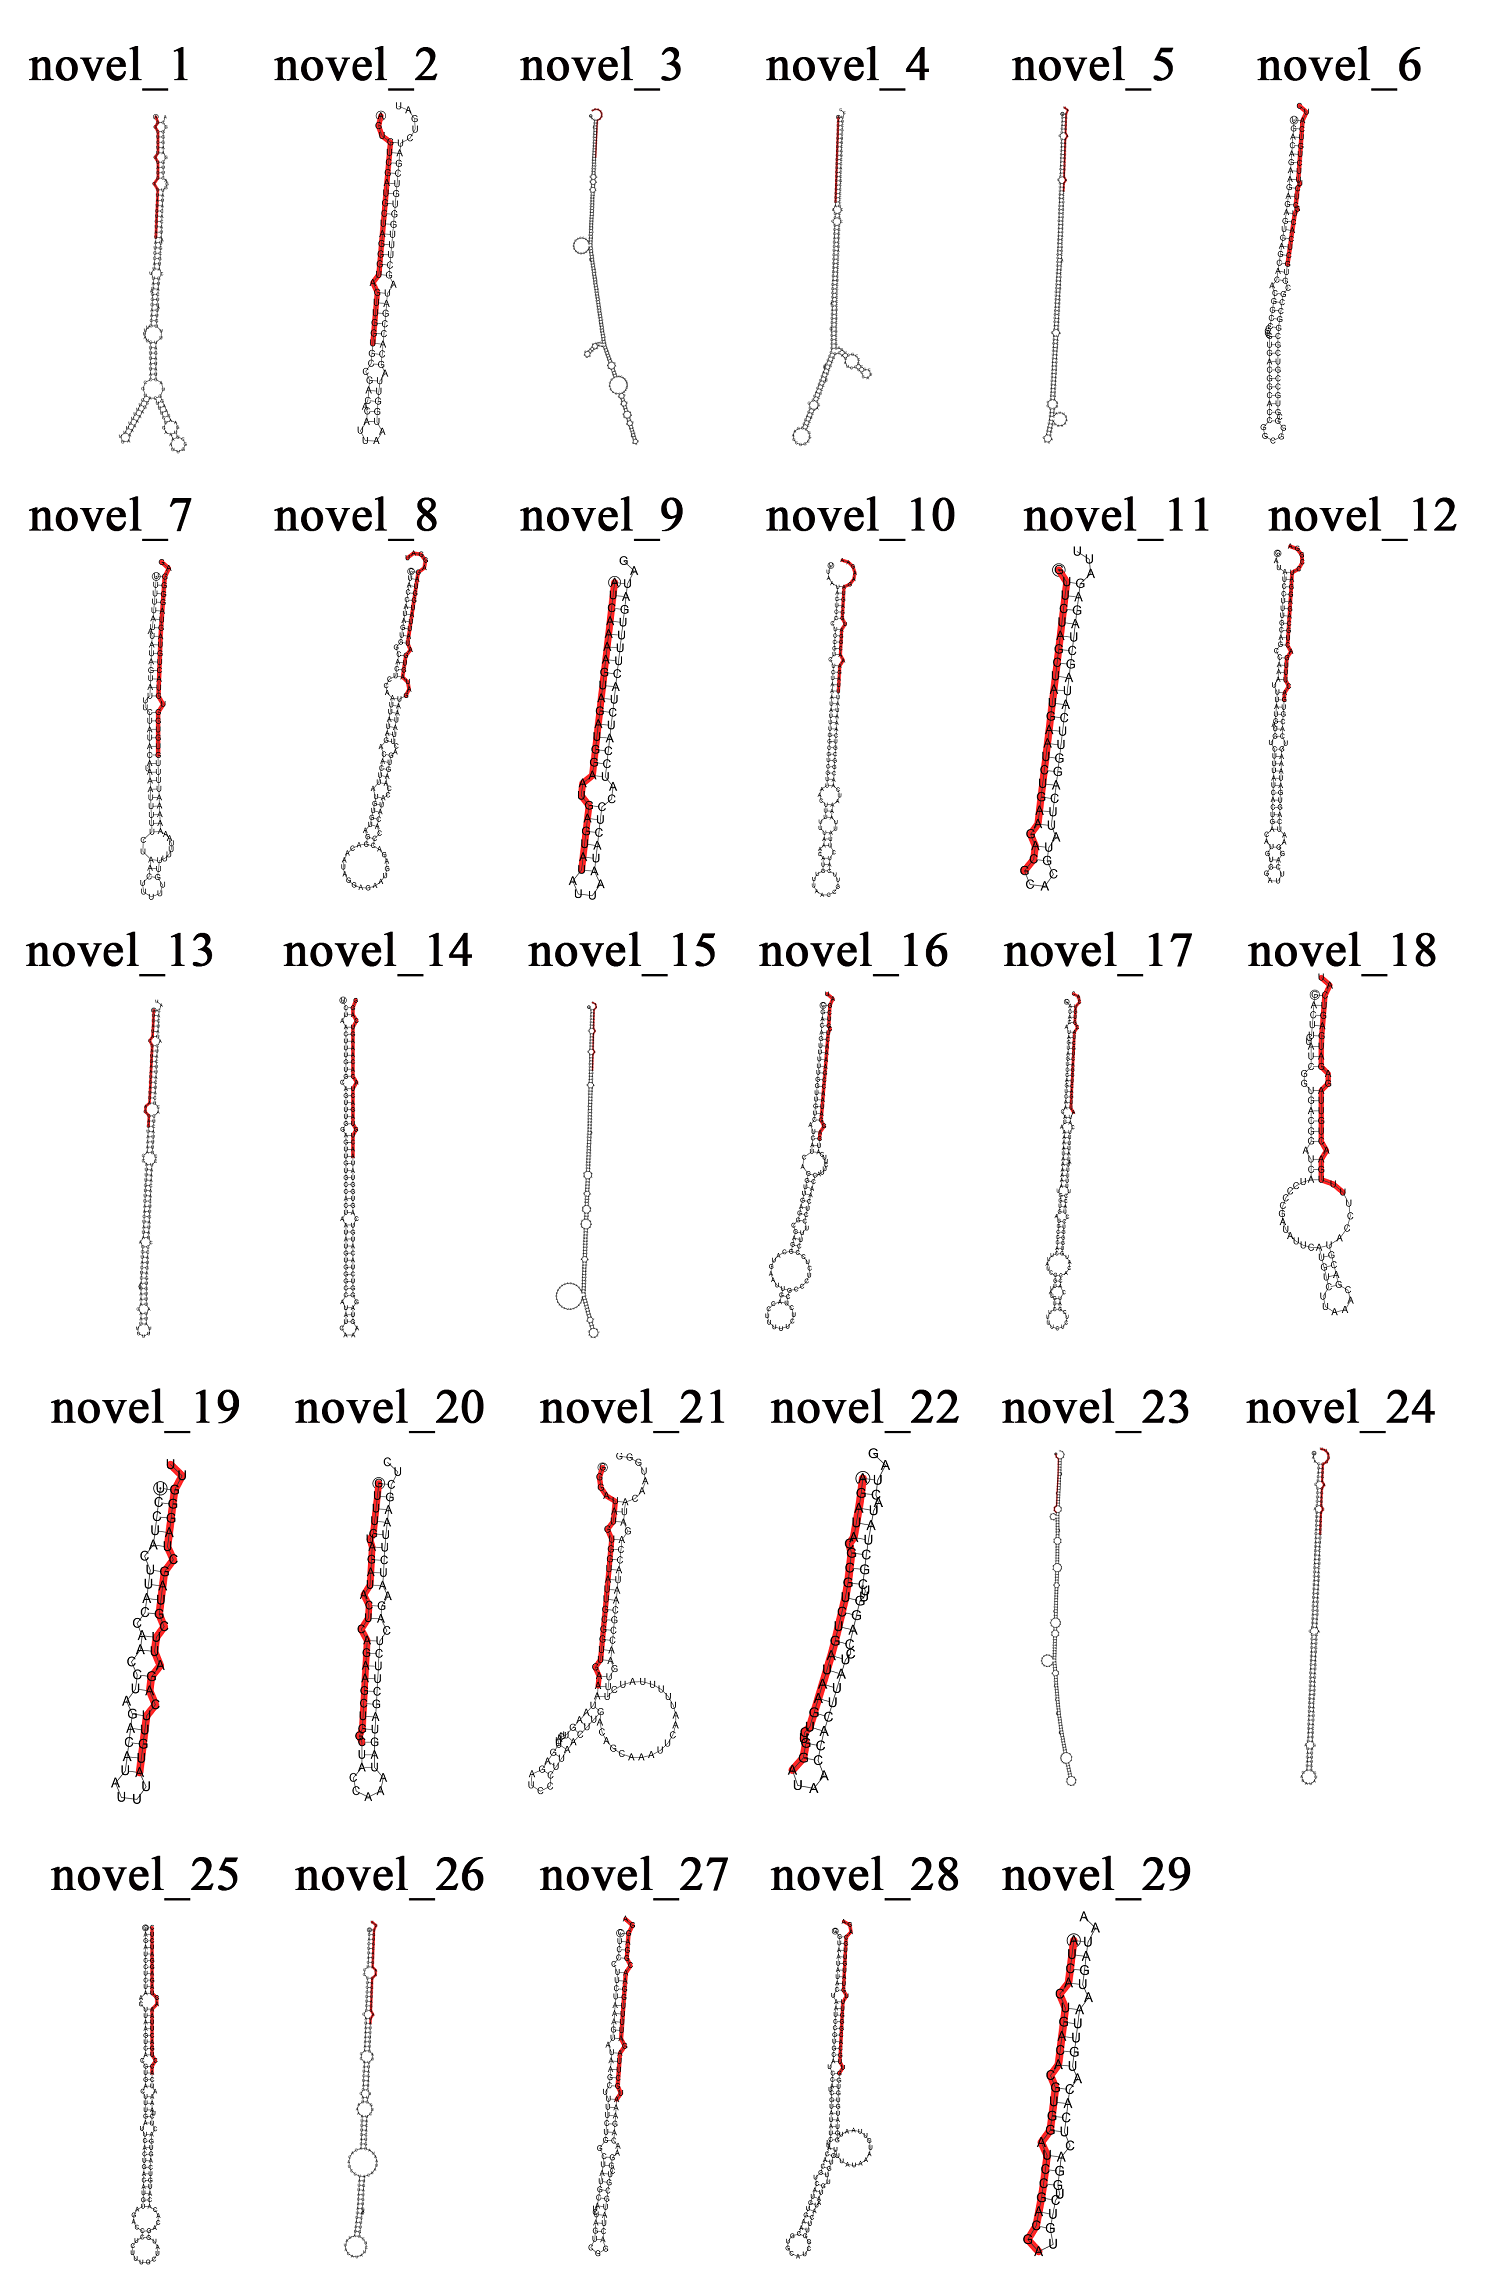

Supplement: s1 [file s1 › Figure_S5.tif]
